# Supplementary material for: Francisella tularensis Glyceraldehyde-3-Phosphate Dehydrogenase Is Relocalized during Intracellular Infection and Reveals Effect on Cytokine Gene Expression and Signaling
Source: Cells. 2023 Feb 13;12(4):607. doi: 10.3390/cells12040607 (PMC9954481; doi:10.3390/cells12040607)
Supplement: Supplementary file 1 [file cells-12-00607-s001.zip › Supplementary_Materials_1_proofs.xlsx]

## Sheet: Legend
	Ivona Pavkova et al.: Francisella tularensis Glyceraldehyde-3-Phosphate Dehydrogenase Is Relocalized during Intracellular Infection and Reveals Effect on Cytokine Gene Expression and Signaling
	Supplementary Table: Identification of candidate GapA interaction partners by SILAC–Pull-Down–MS/MS strategy.
		Proteins_Puld7: identified and quantified proteins
		Abundance Ratios (log2) (by Bio. Rep.): (Sample,bio rep 1) / (Control,bio rep 1)	: SILAC ratio for proteins for biological replicate 1, Sample (Heavy channel)/Control (Light channel)
		Abundance Ratios (log2) (by Bio. Rep.): (Sample,bio rep 2) / (Control,bio rep 2)
		Abundance Ratios (log2) (by Bio. Rep.): (Sample,bio rep 3) / (Control,bio rep 3)
		Abundance Ratios (log2) (by Bio. Rep.): (Sample,bio rep 4) / (Control,bio rep 4)
		Abundance Ratios (log2) (by Bio. Rep.): (Sample,bio rep 5) / (Control,bio rep 5)
		Contaminant
		Marked as
		MRT significant	: Global mean rank test significance at FDR level set to 0.05
		MRT significantDown
		MRT significantUp
		Average Abundance Ratios (log2)	: Average (N=5) of Abundance Ratios (log2)
		Abundances (Grouped): Control	: Intensity based protein abundance in Control
		Abundances (Grouped): Sample	: Intensity based protein abundance in Sample
		Abundances (Grouped): Control+Sample
		Exp. q-value: Combined
		Sum PEP Score
		Coverage [%]
		# Peptides
		# PSMs
		# Protein Unique Peptides
		# Unique Peptides
		# Razor Peptides
		Score Mascot: Mascot
		# Protein Groups
		MW [kDa]
		MRT q	: Global mean rank test q-value
		MRT mrDown
		MRT mrUp
		Accession	: Protein accession number (Uniprot)
		Description	: Protein description
		Protein Group IDs

## Sheet: Proteins_Puld7
Abundance Ratios (log2) (by Bio. Rep.): (Sample,bio rep 1) / (Control,bio rep 1)	Abundance Ratios (log2) (by Bio. Rep.): (Sample,bio rep 2) / (Control,bio rep 2)	Abundance Ratios (log2) (by Bio. Rep.): (Sample,bio rep 3) / (Control,bio rep 3)	Abundance Ratios (log2) (by Bio. Rep.): (Sample,bio rep 4) / (Control,bio rep 4)	Abundance Ratios (log2) (by Bio. Rep.): (Sample,bio rep 5) / (Control,bio rep 5)	Contaminant	Marked as	MRT significant	MRT significantDown	MRT significantUp	Average Abundance Ratios (log2)	Abundances (Grouped): Control	Abundances (Grouped): Sample	Abundances (Grouped): Control+Sample	Exp. q-value: Combined	Sum PEP Score	Coverage [%]	# Peptides	# PSMs	# Protein Unique Peptides	# Unique Peptides	# Razor Peptides	Score Mascot: Mascot	# Protein Groups	MW [kDa]	MRT q	MRT mrDown	MRT mrUp	Accession	Description	Protein Group IDs
-9.485	-10.25	-10.24	-10.01	-10.24	False	Fratu	TRUE	TRUE	FALSE	-10.045	18184600000	16161600	18200800000	0	511.67	82	25	5519	24	25	0	176632	1	35.4	2.98e-10	1.2	685.8	K0E8B7	Glyceraldehyde-3-phosphate dehydrogenase/erythrose-4-phosphate dehydrogenase OS=Francisella tularensis subsp. holarctica FSC200 GN=gapA PE=3 SV=1	248
0.085	-0.08	-0.18	0.29	-0.36	False		FALSE	FALSE	FALSE	-0.049	108122000	133636000	241757000	0	456.416	56	34	651	1	32	2	13666	1	70.8	0.981843	318.8	365.8	P63017	Heat shock cognate 71 kDa protein OS=Mus musculus GN=Hspa8 PE=1 SV=1	601
0.165	0.23	0.06	0.25	0.25	False		FALSE	FALSE	FALSE	0.191	165612000	225617000	391229000	0	419.442	68	24	790	0	11	16	14305	1	41.7	0.58568	428.2	255.2	P60710	Actin, cytoplasmic 1 OS=Mus musculus GN=Actb PE=1 SV=1	462
-0.525	0.78	-0.44	1.81	-0.11	False		FALSE	FALSE	FALSE	0.303	30144100	27581600	57725700	0	369.549	63	35	308	3	35	0	5235	1	53.7	0.750885	388.2	297.8	P20152	Vimentin OS=Mus musculus GN=Vim PE=1 SV=3	893
-0.015	0.13	-0.19	0	0.14	False		FALSE	FALSE	FALSE	0.013	30012800	42287200	72300000	0	315.174	49	28	281	19	25	4	6319	1	70.1	0.848725	359	325	Q61233	Plastin-2 OS=Mus musculus GN=Lcp1 PE=1 SV=4	315
-0.135	-0.15	1.06	-1.48	0.04	False		FALSE	FALSE	FALSE	-0.133	31282200	32797000	64079200	0	291.517	63	28	223	13	28	0	4506	1	57.8	0.995794	313.6	370	P52480	Pyruvate kinase PKM OS=Mus musculus GN=Pkm PE=1 SV=4	26
-0.155	0.06	-0.41	0.83	0.8	False		FALSE	FALSE	FALSE	0.225	8097810	9141620	17239400	0	266.672	23	47	138	39	47	0	1926	1	226.2	0.668027	411	273.8	Q8VDD5	Myosin-9 OS=Mus musculus GN=Myh9 PE=1 SV=4	711
0.095	0.48	0.55	0.41	0.28	False		FALSE	FALSE	FALSE	0.363	6080260	8873010	14953300	0	266.509	23	46	128	0	46	0	1932	1	281	0.394654	471.2	211.6	Q8BTM8	Filamin-A OS=Mus musculus GN=Flna PE=1 SV=5	806
-0.185	0.39	-0.05	0.04	0.29	False		FALSE	FALSE	FALSE	0.097	13572300	17111800	30684100	0	261.593	42	32	182	7	18	15	3463	1	83.2	0.724236	394.6	289.4	P11499	Heat shock protein HSP 90-beta OS=Mus musculus GN=Hsp90ab1 PE=1 SV=3	435
-0.365	0.27	-0.24	0.91	0.16	False		FALSE	FALSE	FALSE	0.147	15893000	14258300	30151400	0	261.268	55	34	158	25	33	1	3687	1	74.2	0.738509	390.2	292	P48678	Prelamin-A/C OS=Mus musculus GN=Lmna PE=1 SV=2	331
-0.295	-0.48	-0.49	-0.12	-0.71	False		FALSE	FALSE	FALSE	-0.419	21198100	17739500	38937600	0	241.595	41	26	239	24	24	0	4749	1	72.4	0.3721	212.8	472.6	P20029	78 kDa glucose-regulated protein OS=Mus musculus GN=Hspa5 PE=1 SV=3	10
0.035	0.05	1.41	-1.4	0.03	False		FALSE	FALSE	FALSE	0.025	17835800	23784200	41619900	0	215.543	72	24	161	0	22	2	3646	1	39.3	0.867048	355.8	328	P05064	Fructose-bisphosphate aldolase A OS=Mus musculus GN=Aldoa PE=1 SV=2	916
-4.745	-6.44	-6.66	-5.84	-6.31	False		TRUE	TRUE	FALSE	-5.999	130114000	1676900	131791000	0	203.661	65	28	373	0	22	8	6404	1	61.9	7.49e-08	4.8	682.2	Q3TIX6	Far upstream element (FUSE)-binding protein 3 OS=Mus musculus GN=Fubp3 PE=1 SV=1	177
-1.695	0.56	-0.28	2.57	0.00999999	False		FALSE	FALSE	FALSE	0.233	5486930	4467710	9954640	0	194.486	30	44	99	43	44	0	1270	1	603.9	0.783809	380.4	303.8	E9Q616	AHNAK nucleoprotein (desmoyokin) OS=Mus musculus GN=Ahnak PE=1 SV=1	439
-0.115	-0.05	-0.03	0.17	0.1	False		FALSE	FALSE	FALSE	0.015	1713190	1931080	3644280	0	188.505	36	15	493	0	2	0	9826	1	42	0.910128	342.8	339.8	P68033	Actin, alpha cardiac muscle 1 OS=Mus musculus GN=Actc1 PE=1 SV=1	791
0.105	1	1.04	-0.08	0.26	False		FALSE	FALSE	FALSE	0.465	3897120	6383790	10280900	0	178.795	68	24	89	23	24	0	1939	1	38.7	0.389421	479.4	204.6	P10107	Annexin A1 OS=Mus musculus GN=Anxa1 PE=1 SV=2	346
-0.125	0.04	-0.29	-0.11	0	False		FALSE	FALSE	FALSE	-0.097	12255600	11949100	24204700	0	167.303	31	21	126	21	21	0	2456	1	76.7	0.995794	311	372.8	P09405	Nucleolin OS=Mus musculus GN=Ncl PE=1 SV=2	359
-0.075	-0.07	1.13	-1.99	0.04	False		FALSE	FALSE	FALSE	-0.193	13607600	15145800	28753400	0	167.103	54	20	112	0	20	0	1794	1	47.1	0.972114	321.6	362.8	P17182	Alpha-enolase OS=Mus musculus GN=Eno1 PE=1 SV=3	59
0.435	0.07	0.28	0.12	0.31	False		FALSE	FALSE	FALSE	0.243	10997200	14526000	25523100	0	157.471	48	15	121	0	3	12	2680	1	28.7	0.487011	450.4	233.2	E9Q7Q3	Tropomyosin alpha-3 chain OS=Mus musculus GN=Tpm3 PE=1 SV=1	866
0.305	0.18	1.48	-1.53	0.22	False		FALSE	FALSE	FALSE	0.131	11007400	15175200	26182600	0	156	65	10	141	0	10	0	2470	1	18	0.610346	422.6	260.8	P17742	Peptidyl-prolyl cis-trans isomerase A OS=Mus musculus GN=Ppia PE=1 SV=2	522
-0.585	-0.3	-1.09	0.94	-0.34	False		FALSE	FALSE	FALSE	-0.275	33209100	25222400	58431400	0	155.6	42	15	156	2	15	0	2542	1	50.1	0.65328	256.6	427.6	P10126	Elongation factor 1-alpha 1 OS=Mus musculus GN=Eef1a1 PE=1 SV=3	235
-0.165	-0.07	0.48	-0.27	-0.09	False		FALSE	FALSE	FALSE	-0.023	7978770	9872860	17851600	0	155.042	36	26	94	25	25	1	1455	1	95.3	0.972114	321.6	361.8	P58252	Elongation factor 2 OS=Mus musculus GN=Eef2 PE=1 SV=2	101
0.105	-0.00999999	1.45	-1.74	0.02	False		FALSE	FALSE	FALSE	-0.035	10118100	14692900	24811100	0	153.731	56	18	120	6	18	0	1599	1	44.5	0.877757	352.4	332.2	P09411	Phosphoglycerate kinase 1 OS=Mus musculus GN=Pgk1 PE=1 SV=4	72
-1.495	-0.08	-0.4	0.67	-0.74	False		FALSE	FALSE	FALSE	-0.409	1199960	1630800	2830760	0	152.74	41	14	121	0	2	0	2496	1	29	0.60177	248	437	D3Z2H9	Uncharacterized protein OS=Mus musculus GN=Tpm3-rs7 PE=3 SV=1	536
0.015	0.8	0.77	-0.24	0.28	False		FALSE	FALSE	FALSE	0.325	1071110	1883980	2955080	0	151.94	26	19	90	5	7	0	1901	1	84.7	0.487011	450.2	234.2	P07901	Heat shock protein HSP 90-alpha OS=Mus musculus GN=Hsp90aa1 PE=1 SV=4	46
-0.015	-0.31	-0.72	0.63	-0.57	False		FALSE	FALSE	FALSE	-0.197	59277800	53264600	112542000	0	150.953	83	9	196	9	9	0	4328	1	11.6	0.743202	273	411.8	P99027	60S acidic ribosomal protein P2 OS=Mus musculus GN=Rplp2 PE=1 SV=3	609
0.525	-0.53	-0.17	0.55	-0.49	False		FALSE	FALSE	FALSE	-0.023	14191100	13867800	28058900	0	148.21	26	17	147	0	17	0	2259	1	87.9	0.931874	338.2	346.4	Q8VEK3	Heterogeneous nuclear ribonucleoprotein U OS=Mus musculus GN=Hnrnpu PE=1 SV=1	813
-5.675	-6.4	-6.88	-6.6	-6.12	False		TRUE	TRUE	FALSE	-6.335	110867000	690074	111557000	0	140.652	47	18	214	18	18	0	3486	1	53.6	5.12e-08	4.2	682.8	P47791	Glutathione reductase, mitochondrial OS=Mus musculus GN=Gsr PE=1 SV=3	573
0.725	1.13	0.8	2.5	0.73	False		TRUE	FALSE	TRUE	1.177	4875300	12546300	17421600	0	133.591	47	17	125	2	3	17	2110	1	49.6	0.012817	613.8	72.2	P99024	Tubulin beta-5 chain OS=Mus musculus GN=Tubb5 PE=1 SV=1	776
-3.305	-4.91	-6.01	-4.34	-4.52	False		TRUE	TRUE	FALSE	-4.617	23651500	1759470	25411000	0	133.159	63	24	114	20	24	0	1956	1	59.3	1.44e-06	9.4	677.4	E9Q1P8	Interferon regulatory factor 2-binding protein 2 OS=Mus musculus GN=Irf2bp2 PE=1 SV=1	108
-0.195	-0.3	-0.07	-0.68	-0.57	False		FALSE	FALSE	FALSE	-0.363	5598500	5012470	10611000	0	121.719	34	18	72	14	18	0	1222	1	57	0.49229	233	451.4	P09103	Protein disulfide-isomerase OS=Mus musculus GN=P4hb PE=1 SV=2	19
1.805	1.22	1.43	4.48	1.69	False		TRUE	FALSE	TRUE	2.125	145289	892536	1037830	0	119.309	43	16	109	1	2	0	1826	1	49.8	0.000721471	649.4	36.8	P68372	Tubulin beta-4B chain OS=Mus musculus GN=Tubb4b PE=1 SV=1	788
-0.355	0.37	0.17	1.01	0.09	False		FALSE	FALSE	FALSE	0.257	6183450	8542160	14725600	0	116.642	34	18	94	2	12	5	1592	1	70.6	0.659794	412.6	271.8	P29341	Polyadenylate-binding protein 1 OS=Mus musculus GN=Pabpc1 PE=1 SV=2	43
0.315	0.18	1.49	-1.76	0.24	False		FALSE	FALSE	FALSE	0.093	7123810	9176510	16300300	0	116.092	42	14	83	10	14	0	1980	1	35.7	0.610346	422.2	261.2	P48036	Annexin A5 OS=Mus musculus GN=Anxa5 PE=1 SV=1	78
-0.135	-0.11	0.21	-0.31	-0.47	False		FALSE	FALSE	FALSE	-0.163	7968190	7503480	15471700	0	115.262	34	15	84	12	15	0	1401	1	56.6	0.790634	279.4	405.2	P27773	Protein disulfide-isomerase A3 OS=Mus musculus GN=Pdia3 PE=1 SV=2	338
-0.555	-0.22	-1.82	-0.17	-0.28	False		FALSE	FALSE	FALSE	-0.609	4209250	2486950	6696200	0	115.14	22	16	69	6	14	0	1601	1	92.4	0.303206	201.6	482.8	P08113	Endoplasmin OS=Mus musculus GN=Hsp90b1 PE=1 SV=2	849
0.375	0.33	1.87	-1.24	0.36	False		FALSE	FALSE	FALSE	0.339	7553710	12075100	19628800	0	113.49	31	17	85	17	17	0	1152	1	67.6	0.394654	473	211.4	P40142	Transketolase OS=Mus musculus GN=Tkt PE=1 SV=1	516
-0.035	-0.1	-0.41	0.24	-0.35	False		FALSE	FALSE	FALSE	-0.131	7262370	6398970	13661300	0	112.334	34	17	74	17	17	0	1814	1	73.4	0.858123	290	393.2	P38647	Stress-70 protein, mitochondrial OS=Mus musculus GN=Hspa9 PE=1 SV=3	694
0.065	0.1	1.14	-1.08	0.15	False		FALSE	FALSE	FALSE	0.075	5444010	6939210	12383200	0	112.255	46	12	73	7	9	2	1533	1	27.8	0.75875	382.6	300	P63101	14-3-3 protein zeta/delta OS=Mus musculus GN=Ywhaz PE=1 SV=1	873
0.555	-0.58	-0.47	-0.01	-1.24	False		FALSE	FALSE	FALSE	-0.349	20649800	19137500	39787300	0	111.828	51	12	135	12	12	0	3241	1	23.7	0.793673	280	405.6	P24369	Peptidyl-prolyl cis-trans isomerase B OS=Mus musculus GN=Ppib PE=1 SV=2	70
-1.225	-1.6	-1.23	-1.01	-1.52	False		TRUE	TRUE	FALSE	-1.317	26200700	12451400	38652000	0	109.048	56	9	120	9	9	0	2615	1	11.4	0.019975	96	590.2	P62806	Histone H4 OS=Mus musculus GN=Hist1h4a PE=1 SV=2	552
0.535	0.22	-0.86	0.64	-0.27	False		FALSE	FALSE	FALSE	0.053	9241210	8713990	17955200	0	108.244	26	15	97	0	11	4	1981	1	69.2	0.750885	386.8	297.4	Q8BTS0	DEAD (Asp-Glu-Ala-Asp) box polypeptide 5 OS=Mus musculus GN=Ddx5 PE=1 SV=1	749
0.245	-0.00999999	1.02	-1.36	0.00999999	False		FALSE	FALSE	FALSE	-0.019	9898800	10867100	20765900	0	107.812	53	12	84	3	12	0	1575	1	32.2	0.847371	363.6	320	P17751	Triosephosphate isomerase OS=Mus musculus GN=Tpi1 PE=1 SV=4	204
0.225	0.17	0.71	-1.12	0.12	False		FALSE	FALSE	FALSE	0.021	3454760	3771130	7225890	0	107.305	30	18	69	11	18	0	1193	1	67.7	0.738509	389.6	293.8	P26041	Moesin OS=Mus musculus GN=Msn PE=1 SV=3	120
-1.085	-1.74	-2.63	-0.97	-1.61	False		TRUE	TRUE	FALSE	-1.607	23728900	6734030	30463000	0	105.987	23	14	108	13	13	1	2069	1	75.4	0.0115723	83	603.4	Q8VIJ6	Splicing factor, proline- and glutamine-rich OS=Mus musculus GN=Sfpq PE=1 SV=1	97
0.095	0.66	0.8	0.49	0.24	False		FALSE	FALSE	FALSE	0.457	7235930	11138800	18374700	0	104.536	46	11	70	1	11	0	1783	1	38.7	0.380711	486.2	198.2	Q99LB4	Capping protein (Actin filament), gelsolin-like OS=Mus musculus GN=Capg PE=1 SV=1	574
-0.415	0.24	0.17	1.05	0.13	False		FALSE	FALSE	FALSE	0.235	6155620	7638390	13794000	0	99.272	46	11	77	2	2	8	1905	1	26.8	0.671858	407	276.6	Q8C845	EF-hand domain-containing protein D2 OS=Mus musculus GN=Efhd2 PE=1 SV=1	470
-0.395	-0.17	-0.62	0.33	-0.1	False		FALSE	FALSE	FALSE	-0.191	4186120	3352600	7538720	0	98.406	29	15	54	0	15	0	952	1	82.2	0.743202	273.2	410.2	A0A0R4J104	Disabled homolog 2 OS=Mus musculus GN=Dab2 PE=1 SV=1	576
0.175	0.1	0.93	-0.45	-0.08	False		FALSE	FALSE	FALSE	0.135	6919070	9792080	16711100	0	96.974	44	12	60	2	10	2	976	1	29.2	0.750885	385.8	298.4	P62259	14-3-3 protein epsilon OS=Mus musculus GN=Ywhae PE=1 SV=1	875
-0.385	-0.05	0.49	-0.53	-0.04	False		FALSE	FALSE	FALSE	-0.103	11040600	11315000	22355600	0	96.429	75	16	108	1	16	0	1885	1	22.2	0.980558	308.4	377.4	P35700	Peroxiredoxin-1 OS=Mus musculus GN=Prdx1 PE=1 SV=1	107
0.135	0.04	1.77	-1.9	0.06	False		FALSE	FALSE	FALSE	0.021	3388160	3813800	7201960	0	96.275	61	16	49	9	16	0	758	1	35.6	0.823863	371.8	312.4	P08249	Malate dehydrogenase, mitochondrial OS=Mus musculus GN=Mdh2 PE=1 SV=3	666
0.585	0.25	1.13	-0.35	0.65	False		FALSE	FALSE	FALSE	0.453	2093130	2935020	5028150	0	95.593	33	13	44	10	13	0	771	1	62.2	0.304888	505.4	180.2	O08553	Dihydropyrimidinase-related protein 2 OS=Mus musculus GN=Dpysl2 PE=1 SV=2	122
0.415	0.41	1.5	-1.2	0.37	False		FALSE	FALSE	FALSE	0.299	4593330	9798810	14392100	0	95.219	33	12	59	0	12	0	1242	1	42.1	0.389421	478.4	206.6	A0A1B0GR11	Transaldolase OS=Mus musculus GN=Taldo1 PE=1 SV=1	169
0.135	0.16	1.32	-1.45	0.13	False		FALSE	FALSE	FALSE	0.059	6886070	9422660	16308700	0	94.178	74	10	92	2	10	0	1650	1	14.9	0.738509	391.4	292.6	P62962	Profilin-1 OS=Mus musculus GN=Pfn1 PE=1 SV=2	463
-0.055	0.16	-0.37	0.62	0.2	False		FALSE	FALSE	FALSE	0.111	7111230	8088080	15199300	0	92.802	37	14	61	0	14	0	1545	1	50.9	0.750885	386.8	298	P61979	Heterogeneous nuclear ribonucleoprotein K OS=Mus musculus GN=Hnrnpk PE=1 SV=1	554
0.555	0.91	1.48	0.22	0.77	False		FALSE	FALSE	FALSE	0.787	1880340	3912870	5793210	0	91.584	37	12	40	0	12	0	789	1	53.9	0.0761418	569.2	116.4	A0A1B0GSG5	Ribonuclease inhibitor OS=Mus musculus GN=Rnh1 PE=1 SV=1	218
-0.925	0.71	-0.21	1.94	-0.34	False		FALSE	FALSE	FALSE	0.235	1820610	3079370	4899980	0	90.74	31	14	44	11	14	0	805	1	60.9	0.823863	373.6	312.2	P63038	60 kDa heat shock protein, mitochondrial OS=Mus musculus GN=Hspd1 PE=1 SV=1	780
-0.135	-0.49	-0.16	-0.53	-0.24	False		FALSE	FALSE	FALSE	-0.311	4728300	4466260	9194570	0	88.932	39	12	53	0	11	0	669	1	39.6	0.606707	248.8	436.6	Q8BG05	Heterogeneous nuclear ribonucleoprotein A3 OS=Mus musculus GN=Hnrnpa3 PE=1 SV=1	696
0.075	0.69	0.83	0.14	0.19	False		FALSE	FALSE	FALSE	0.385	3140320	5046430	8186760	0	88.123	38	14	49	11	14	0	676	1	51.5	0.431637	463.8	218.2	P40124	Adenylyl cyclase-associated protein 1 OS=Mus musculus GN=Cap1 PE=1 SV=4	680
0.905	0.22	1.55	0.58	0.39	False		FALSE	FALSE	FALSE	0.729	591641	1133410	1725050	0	88.061	36	10	60	0	4	0	1249	1	28.5	0.142917	548.4	137.2	G5E8R1	Tropomyosin 1, alpha, isoform CRA_j OS=Mus musculus GN=Tpm1 PE=1 SV=1	190
0.125	0.5	1.25	-0.05	0.59	False		FALSE	FALSE	FALSE	0.483	2496600	4406570	6903160	0	87.636	49	10	59	5	10	0	1021	1	22.4	0.332767	495.8	188.4	Q9WVA4	Transgelin-2 OS=Mus musculus GN=Tagln2 PE=1 SV=4	185
0.605	0.82	0.61	2.09	0.77	False		TRUE	FALSE	TRUE	0.979	3683190	7891450	11574600	0	86.666	40	12	71	0	12	0	1141	1	50.1	0.0305718	597.6	88.6	P05213	Tubulin alpha-1B chain OS=Mus musculus GN=Tuba1b PE=1 SV=2	674
0.195	-0.00999999	0.12	-0.5	0.12	False		FALSE	FALSE	FALSE	-0.015	2139120	2485860	4624980	0	85.49	34	12	44	0	11	0	722	1	38.8	0.847371	361.2	323.4	Q5EBP8	Heterogeneous nuclear ribonucleoprotein A1 OS=Mus musculus GN=Hnrnpa1 PE=1 SV=1	693
0.295	0.27	-0.08	0.36	0.19	False		FALSE	FALSE	FALSE	0.207	6513440	8803600	15317000	0	85.041	24	15	65	4	13	2	1003	1	85.9	0.536148	437.2	244.8	P13020	Gelsolin OS=Mus musculus GN=Gsn PE=1 SV=3	730
0.145	0.2	1.11	-0.7	0.1	False		FALSE	FALSE	FALSE	0.171	4197810	9459720	13657500	0	82.696	58	8	63	1	8	0	1288	1	18.5	0.671858	408	276.6	P18760	Cofilin-1 OS=Mus musculus GN=Cfl1 PE=1 SV=3	751
0.305	0.27	-0.25	1.01	0.19	False		FALSE	FALSE	FALSE	0.305	9937170	14690600	24627800	0	82.311	58	8	91	6	8	0	1875	1	16.9	0.465287	460.6	224.6	Q60605	Myosin light polypeptide 6 OS=Mus musculus GN=Myl6 PE=1 SV=3	651
-0.425	-0.08	-0.45	1.58	-0.68	False		FALSE	FALSE	FALSE	-0.011	4621390	4766150	9387540	0	80.829	42	8	61	3	8	0	1104	1	16.3	0.889844	294.8	390.4	P62264	40S ribosomal protein S14 OS=Mus musculus GN=Rps14 PE=1 SV=3	631
0.125	0.00999999	0.24	-0.27	0.16	False		FALSE	FALSE	FALSE	0.053	4408790	5597900	10006700	0	79.922	33	12	54	8	11	1	693	1	37.4	0.80489	374	309	O88569	Heterogeneous nuclear ribonucleoproteins A2/B1 OS=Mus musculus GN=Hnrnpa2b1 PE=1 SV=2	56
0.895	0.00999999	-0.06	0.56	-0.34	False		FALSE	FALSE	FALSE	0.213	10868700	13930500	24799200	0	79.497	34	7	97	2	7	0	1911	1	18.9	0.690159	399.6	285.2	P63325	40S ribosomal protein S10 OS=Mus musculus GN=Rps10 PE=1 SV=1	215
0.135	-0.2	-0.36	0.62	-0.11	False		FALSE	FALSE	FALSE	0.017	7985930	8071670	16057600	0	79.204	54	7	84	1	7	0	1357	1	14.5	0.92425	340.2	344.2	Q6ZWZ6	40S ribosomal protein S12 OS=Mus musculus GN=Rps12 PE=1 SV=1	754
1.195	0.47	0.13	1.27	0.08	False		FALSE	FALSE	FALSE	0.629	5898760	10806200	16704900	0	78.303	53	14	87	4	14	0	1495	1	26.7	0.265106	512	173.2	P62908	40S ribosomal protein S3 OS=Mus musculus GN=Rps3 PE=1 SV=1	782
0.105	-0.04	1.52	-1.67	0.11	False		FALSE	FALSE	FALSE	0.005	7915680	10124500	18040200	0	76.923	40	4	57	4	4	0	1021	1	5.7	0.847371	363.8	320.8	P20065	Thymosin beta-4 OS=Mus musculus GN=Tmsb4x PE=1 SV=1	661
-0.185	-0.32	-1.23	0.32	-0.39	False		FALSE	FALSE	FALSE	-0.361	11029700	8297050	19326700	0	76.301	40	9	69	1	9	0	1607	1	34.2	0.541731	241	444.4	P14869	60S acidic ribosomal protein P0 OS=Mus musculus GN=Rplp0 PE=1 SV=3	560
0.265	0.26	1.04	-0.26	0.21	False		FALSE	FALSE	FALSE	0.303	1137980	1681170	2819150	0	74.638	29	8	63	4	4	0	951	1	28.3	0.487011	450	234	P61982	14-3-3 protein gamma OS=Mus musculus GN=Ywhag PE=1 SV=2	507
-0.115	1.43	1.3	-0.39	0.34	False		FALSE	FALSE	FALSE	0.513	3095240	3594960	6690200	0	74.409	29	12	41	12	12	0	621	1	50	0.431637	466.6	218	Q9D8N0	Elongation factor 1-gamma OS=Mus musculus GN=Eef1g PE=1 SV=3	152
0.195	0.6	1.26	-0.21	0.3	False		FALSE	FALSE	FALSE	0.429	2968790	5377730	8346510	0	70.004	36	10	44	0	10	0	635	1	32.8	0.384694	483.8	201.2	P14206	40S ribosomal protein SA OS=Mus musculus GN=Rpsa PE=1 SV=4	105
0.065	-0.23	-0.89	0.18	-0.09	False		FALSE	FALSE	FALSE	-0.193	3323600	3729910	7053510	0	69.196	33	9	53	3	7	2	841	1	45.7	0.857391	289.6	395.4	Q9Z2X1	Heterogeneous nuclear ribonucleoprotein F OS=Mus musculus GN=Hnrnpf PE=1 SV=3	881
0.265	0.19	1.49	-1.77	0.33	False		FALSE	FALSE	FALSE	0.101	5469140	7221130	12690300	0	68.244	44	6	53	0	2	5	733	1	30.2	0.58568	428.4	256	E9PZF0	Nucleoside diphosphate kinase OS=Mus musculus GN=Gm20390 PE=3 SV=1	545
0.145	0.13	0.83	-0.44	0.11	False		FALSE	FALSE	FALSE	0.155	3615690	4949010	8564700	0	67.927	40	11	59	7	7	2	732	1	28.2	0.690159	400.6	284.2	P68510	14-3-3 protein eta OS=Mus musculus GN=Ywhah PE=1 SV=2	121
0.505	0.67	1.76	-1.23	0.57	False		FALSE	FALSE	FALSE	0.455	2117960	5355600	7473560	0	67.747	31	8	32	8	8	0	524	1	42.7	0.265106	513	172.4	Q04447	Creatine kinase B-type OS=Mus musculus GN=Ckb PE=1 SV=1	686
-0.015	-0.00999999	0.00999999	0.1	0.04	False		FALSE	FALSE	FALSE	0.025	3185400	4010380	7195780	0	66.975	26	12	48	12	12	0	558	1	62.5	0.907764	347.8	338.6	Q60864	Stress-induced-phosphoprotein 1 OS=Mus musculus GN=Stip1 PE=1 SV=1	231
-0.355	0.5	-0.08	-0.04	0.06	False		FALSE	FALSE	FALSE	0.017	1558830	1580450	3139280	0	65.256	18	8	21	0	8	0	631	1	59.5	0.869111	357	329	P42932	T-complex protein 1 subunit theta OS=Mus musculus GN=Cct8 PE=1 SV=3	557
-0.005	-0.05	0.46	-0.99	0.21	False		FALSE	FALSE	FALSE	-0.075	1208850	1358410	2567250	0	64.678	17	12	30	11	12	0	391	1	89.3	0.910128	345.4	340	Q01853	Transitional endoplasmic reticulum ATPase OS=Mus musculus GN=Vcp PE=1 SV=4	117
0.285	0.23	1.65	-1.54	0.15	False		FALSE	FALSE	FALSE	0.155	3330520	4642910	7973440	0	64.27	37	8	53	1	8	0	827	1	28.8	0.615318	422.8	262	P17918	Proliferating cell nuclear antigen OS=Mus musculus GN=Pcna PE=1 SV=2	276
0.055	0.37	1.55	-1.47	0.45	False		FALSE	FALSE	FALSE	0.191	2140100	2927890	5067980	0	63.741	27	5	25	5	5	0	329	1	23.4	0.564494	434.2	250.6	Q99PT1	Rho GDP-dissociation inhibitor 1 OS=Mus musculus GN=Arhgdia PE=1 SV=3	255
0.315	0.51	1.73	-0.63	0.14	False		FALSE	FALSE	FALSE	0.413	260634	438293	698927	0	62.771	38	5	54	0	1	0	737	1	17.2	0.411458	471.6	214	P15532	Nucleoside diphosphate kinase A OS=Mus musculus GN=Nme1 PE=1 SV=1	550
0.275	0.18	1.45	-1.39	0.4	False		FALSE	FALSE	FALSE	0.183	1506260	2139170	3645430	0	62.572	31	11	28	11	11	0	540	1	47.4	0.530861	440.8	242.6	P05202	Aspartate aminotransferase, mitochondrial OS=Mus musculus GN=Got2 PE=1 SV=1	855
0.755	0.61	0.43	1.5	0.04	False		FALSE	FALSE	FALSE	0.667	6294750	10990900	17285600	0	62.402	29	5	59	5	5	0	965	1	13.4	0.193741	528.8	156.6	P60867	40S ribosomal protein S20 OS=Mus musculus GN=Rps20 PE=1 SV=1	202
0.275	0.47	1.93	0.44	0.35	False		FALSE	FALSE	FALSE	0.693	394158	712015	1106170	0	61.718	33	7	39	1	3	0	592	1	28.1	0.170408	536	148	Q9CQV8	14-3-3 protein beta/alpha OS=Mus musculus GN=Ywhab PE=1 SV=3	555
-1.955	-2.54	-2.97	-1.47	-2.65	False		TRUE	TRUE	FALSE	-2.317	9245390	1962350	11207700	0	61.325	25	14	65	4	14	0	917	1	69.4	0.0013862	48.6	638.4	Q8C2Q3	RNA-binding protein 14 OS=Mus musculus GN=Rbm14 PE=1 SV=1	47
-0.155	0.61	-0.13	0.17	0.34	False		FALSE	FALSE	FALSE	0.167	940095	1226600	2166700	0	61.039	28	14	21	0	13	1	359	1	58	0.646563	417.8	268.8	P80315	T-complex protein 1 subunit delta OS=Mus musculus GN=Cct4 PE=1 SV=3	406
0.245	0.48	0.77	-0.3	0.55	False		FALSE	FALSE	FALSE	0.349	803907	1354780	2158680	0	60.934	18	13	23	0	7	6	286	1	107	0.389421	481.4	204.4	A0A1L1SV25	Alpha-actinin-4 OS=Mus musculus GN=Actn4 PE=1 SV=1	250
0.295	0.67	0.57	0.74	0.57	False		FALSE	FALSE	FALSE	0.569	846978	1318740	2165710	0	60.378	18	10	65	0	7	0	1180	1	70.7	0.160491	541.8	143.4	Q99K51	Plastin-3 OS=Mus musculus GN=Pls3 PE=1 SV=3	841
-0.255	-0.4	0.37	-0.92	0.76	False		FALSE	FALSE	FALSE	-0.089	4734460	3582120	8316580	0	59.744	37	10	34	0	10	0	802	1	38.6	0.950642	332.2	352.4	A0A0A0MQF6	Glyceraldehyde-3-phosphate dehydrogenase OS=Mus musculus GN=Gapdh PE=1 SV=1	398
-1.265	0.39	-0.81	1.57	-0.93	False		FALSE	FALSE	FALSE	-0.209	1891320	1604410	3495730	0	59.686	20	12	42	9	11	0	770	1	66.7	0.895662	296.8	389.6	P14733	Lamin-B1 OS=Mus musculus GN=Lmnb1 PE=1 SV=3	565
-2.155	-3.1	-3.15	-1.7	-2.47	False		TRUE	TRUE	FALSE	-2.515	13466600	1743660	15210200	0	59.499	23	9	60	0	1	8	876	1	70.4	0.000717031	41	646	Q64213	Splicing factor 1 OS=Mus musculus GN=Sf1 PE=1 SV=6	443
0.215	0.29	-0.31	0.36	0.6	False		FALSE	FALSE	FALSE	0.231	660111	800574	1460690	0	58.731	19	6	43	0	4	0	738	1	51.2	0.487011	450.4	234.6	Q8C2Q7	Heterogeneous nuclear ribonucleoprotein H OS=Mus musculus GN=Hnrnph1 PE=1 SV=1	307
-0.615	2.3	0.28	2.87	0.58	False		FALSE	FALSE	FALSE	1.083	97900.5	228533	326433	0	58.322	15	6	28	0	1	0	810	1	61.4	0.313367	504.4	182.2	F6ZFU0	Elongation factor 1-delta (Fragment) OS=Mus musculus GN=Eef1d PE=1 SV=1	298
0.065	0	1.51	-1.35	0.03	False		FALSE	FALSE	FALSE	0.051	1399710	1688690	3088410	0	58.303	47	12	21	12	12	0	310	1	35.1	0.848725	357.8	324.8	P68040	Receptor of activated protein C kinase 1 OS=Mus musculus GN=Rack1 PE=1 SV=3	835
-0.305	1.13	0.23	0	0.31	False		FALSE	FALSE	FALSE	0.273	2172780	2694730	4867510	0	57.304	14	7	30	0	2	6	800	1	72.9	0.592539	426.2	257.6	A0A0R4J1E2	Elongation factor 1-delta OS=Mus musculus GN=Eef1d PE=1 SV=1	343
-0.475	-0.46	-1.71	0.26	-0.53	False		FALSE	FALSE	FALSE	-0.583	8500580	6928670	15429300	0	57.233	55	6	74	5	6	0	1224	1	17.8	0.303206	201.6	483.4	P35979	60S ribosomal protein L12 OS=Mus musculus GN=Rpl12 PE=1 SV=2	272
-1.085	-1.29	-2.48	-0.82	-1.61	False		TRUE	TRUE	FALSE	-1.457	6834600	2463590	9298180	0	56.881	27	10	49	8	8	1	819	1	54.5	0.0191635	94.4	592	Q99K48	Non-POU domain-containing octamer-binding protein OS=Mus musculus GN=Nono PE=1 SV=3	889
0.015	0.13	-0.26	0.5	0.12	False		FALSE	FALSE	FALSE	0.101	4013040	5147130	9160170	0	56.582	22	8	49	0	8	0	566	1	41.6	0.800669	378.6	307.6	Q99L47	Hsc70-interacting protein OS=Mus musculus GN=St13 PE=1 SV=1	929
0.455	0.81	0.91	-0.16	0.64	False		FALSE	FALSE	FALSE	0.531	1045900	2066490	3112390	0	56.25	6	14	21	0	14	0	291	1	272.3	0.193741	529	156.6	P19096	Fatty acid synthase OS=Mus musculus GN=Fasn PE=1 SV=2	324
0.465	0	0.09	-0.09	0.31	False		FALSE	FALSE	FALSE	0.155	1877600	2543590	4421190	0	55.558	37	10	46	10	10	0	832	1	28.5	0.591562	427	257.2	Q6IRU2	Tropomyosin alpha-4 chain OS=Mus musculus GN=Tpm4 PE=1 SV=3	808
0.235	0.36	-0.45	0.64	-0.84	False		FALSE	FALSE	FALSE	-0.011	3887280	3700780	7588060	0	55.305	24	7	43	0	7	0	702	1	44.5	0.847371	363.2	323	Q921F2	TAR DNA-binding protein 43 OS=Mus musculus GN=Tardbp PE=1 SV=1	678
-1.305	-1.41	-1.09	-0.77	-1.41	False		TRUE	TRUE	FALSE	-1.197	17329300	8603210	25932500	0	55.24	34	5	74	0	5	0	1095	1	14.9	0.033504	109.2	577	Q8CBB6	Histone H2B OS=Mus musculus GN=Hist1h2br PE=2 SV=1	582
0.075	0.36	1.73	-2.53	0.12	False		FALSE	FALSE	FALSE	-0.049	1916820	2871810	4788630	0	55.006	32	7	27	7	7	0	694	1	27	0.735032	395	291	Q9Z1Q5	Chloride intracellular channel protein 1 OS=Mus musculus GN=Clic1 PE=1 SV=3	409
0.645	0.29	0.49	0.52	0.08	False		FALSE	FALSE	FALSE	0.405	5066400	6633680	11700100	0	54.483	28	6	52	0	6	0	820	1	21.5	0.384694	483.2	202.6	Q3UKW2	Calmodulin OS=Mus musculus GN=Calm1 PE=1 SV=1	701
-0.185	0.52	0.46	0.37	0.03	False		FALSE	FALSE	FALSE	0.239	681086	1120700	1801790	0	54.174	25	11	24	0	11	0	600	1	60.6	0.663906	412.2	272.8	P80318	T-complex protein 1 subunit gamma OS=Mus musculus GN=Cct3 PE=1 SV=1	828
-4.995	-4.72	-4.37	-4.43	-4.26	False		TRUE	TRUE	FALSE	-4.555	733645	46111.9	779757	0	53.95	25	9	57	0	1	0	872	1	59.7	9.84e-07	8.4	678.6	E9Q4Q2	Splicing factor 1 OS=Mus musculus GN=Sf1 PE=1 SV=1	327
1.295	1.39	-0.05	1.28	0.23	False		FALSE	FALSE	FALSE	0.829	291469	385812	677281	0	53.862	14	7	35	0	3	0	822	1	72.5	0.160491	543.4	143	Q3U741	DEAD (Asp-Glu-Ala-Asp) box polypeptide 17, isoform CRA_a OS=Mus musculus GN=Ddx17 PE=1 SV=1	465
-0.185	0.53	-0.38	0.65	-0.35	False		FALSE	FALSE	FALSE	0.053	1336630	1659450	2996080	0	53.491	22	10	25	3	10	0	545	1	56.4	0.869111	355.6	329.8	Q9QYI3	DnaJ homolog subfamily C member 7 OS=Mus musculus GN=Dnajc7 PE=1 SV=2	537
0.045	-0.1	0.97	-1.62	-0.06	False		FALSE	FALSE	FALSE	-0.153	6908860	8317150	15226000	0	53.372	21	7	43	0	7	0	1103	1	39.7	0.981044	319.4	364.6	A0A1B0GSX0	L-lactate dehydrogenase OS=Mus musculus GN=Ldha PE=1 SV=1	720
-0.225	0.05	0.27	-0.23	-0.41	False		FALSE	FALSE	FALSE	-0.109	3848320	4512140	8360460	0	53.325	28	11	42	11	11	0	538	1	48	0.922693	300.2	384	P14211	Calreticulin OS=Mus musculus GN=Calr PE=1 SV=1	142
0.455	-0.47	-0.24	0.22	-0.77	False		FALSE	FALSE	FALSE	-0.161	5085540	3616210	8701750	0	53.228	42	7	37	0	4	3	394	1	35.7	0.995794	311.4	373	P62960	Nuclease-sensitive element-binding protein 1 OS=Mus musculus GN=Ybx1 PE=1 SV=3	606
-1.065	-0.37	-0.53	0.77	-0.27	False		FALSE	FALSE	FALSE	-0.293	2520890	1841080	4361970	0	52.962	17	9	24	9	9	0	485	1	76.7	0.665684	258.6	427.4	Q3U0V1	Far upstream element-binding protein 2 OS=Mus musculus GN=Khsrp PE=1 SV=2	96
0.265	0.26	0.82	-0.88	0.53	False		FALSE	FALSE	FALSE	0.199	2332280	3065290	5397570	0	52.33	24	5	41	0	5	0	566	1	27.5	0.487011	450.4	234.4	P16110	Galectin-3 OS=Mus musculus GN=Lgals3 PE=1 SV=3	773
-0.015	0.09	1.14	-1.19	0.14	False		FALSE	FALSE	FALSE	0.033	929423	1178350	2107770	0	51.772	18	7	20	3	7	0	266	1	59.2	0.830146	371.2	315.4	Q00612	Glucose-6-phosphate 1-dehydrogenase X OS=Mus musculus GN=G6pdx PE=1 SV=3	448
-2.405	-3.68	-3.54	-3.2	-3.44	False		TRUE	TRUE	FALSE	-3.253	8699490	861755	9561250	0	51.196	31	12	51	4	12	0	489	1	79.3	4.53e-05	22.2	664.2	Q9CW46	Ribonucleoprotein PTB-binding 1 OS=Mus musculus GN=Raver1 PE=1 SV=2	734
0.535	0.14	0.58	-0.13	0.53	False		FALSE	FALSE	FALSE	0.331	1227290	2411430	3638720	0	51.176	32	6	28	4	5	2	409	1	24.1	0.389421	477.6	207.2	P30681	High mobility group protein B2 OS=Mus musculus GN=Hmgb2 PE=1 SV=3	616
0.395	-0.06	0.22	0.76	-0.14	False		FALSE	FALSE	FALSE	0.235	3084640	3844570	6929210	0	51.102	35	7	41	1	7	0	359	1	24.8	0.646563	413.6	268.6	Q5XJF6	Ribosomal protein OS=Mus musculus GN=Rpl10a PE=1 SV=1	157
-0.115	-0.09	0.56	0.13	-0.21	False		FALSE	FALSE	FALSE	0.055	1787570	2116130	3903700	0	51.078	36	7	35	0	7	0	544	1	16.8	0.935521	336.4	347.8	P63242	Eukaryotic translation initiation factor 5A-1 OS=Mus musculus GN=Eif5a PE=1 SV=2	584
0.265	0.15	1.54	-0.65	0.22	False		FALSE	FALSE	FALSE	0.305	1011400	1451780	2463180	0	50.819	28	8	21	0	8	0	602	1	35.9	0.53446	440.2	244	P97429	Annexin A4 OS=Mus musculus GN=Anxa4 PE=1 SV=4	653
-0.335	-0.66	-0.25	-0.02	-0.21	False		FALSE	FALSE	FALSE	-0.295	2703050	2584900	5287950	0	50.473	3	4	26	0	4	0	816	1	220.4	0.588382	246.4	439.4	P70670	Nascent polypeptide-associated complex subunit alpha, muscle-specific form OS=Mus musculus GN=Naca PE=1 SV=2	5
-0.185	-0.25	-0.52	-0.03	0.05	False		FALSE	FALSE	FALSE	-0.187	1249640	1117240	2366880	0	50.059	21	10	25	3	9	0	354	1	59.6	0.808874	283	401.6	P80316	T-complex protein 1 subunit epsilon OS=Mus musculus GN=Cct5 PE=1 SV=1	539
0.115	0.27	0.87	-0.64	0.3	False		FALSE	FALSE	FALSE	0.183	598729	863831	1462560	0	49.157	25	7	42	0	3	0	647	1	34.3	0.58568	430.6	254.8	F6VW30	14-3-3 protein theta (Fragment) OS=Mus musculus GN=Ywhaq PE=1 SV=1	245
-0.175	0.31	1.29	0.27	0.11	False		FALSE	FALSE	FALSE	0.361	1206690	1694680	2901370	0	48.012	23	8	19	3	8	0	351	1	46.1	0.58505	430.2	253.8	P60843	Eukaryotic initiation factor 4A-I OS=Mus musculus GN=Eif4a1 PE=1 SV=1	379
0.135	0.15	1.93	-2.4	0.11	False		FALSE	FALSE	FALSE	-0.015	2348000	2863980	5211980	0	46.679	25	9	30	9	9	0	440	1	53.2	0.750885	387.8	298.2	Q9DCD0	6-phosphogluconate dehydrogenase, decarboxylating OS=Mus musculus GN=Pgd PE=1 SV=3	246
0.025	0.46	0.83	-0.91	0.43	False		FALSE	FALSE	FALSE	0.167	4614130	7677570	12291700	0	46.552	24	11	44	3	11	0	588	1	51	0.58505	431.6	253.6	O89053	Coronin-1A OS=Mus musculus GN=Coro1a PE=1 SV=5	491
-0.225	-0.56	-3.7	-0.03	-1.21	False		FALSE	FALSE	FALSE	-1.145	4307650	2344850	6652500	0	46.002	14	5	31	0	5	0	997	1	42.3	0.182798	168	518	Q9WV02	RNA-binding motif protein, X chromosome OS=Mus musculus GN=Rbmx PE=1 SV=1	510
0.255	0.57	1.9	-0.98	0.31	False		FALSE	FALSE	FALSE	0.411	674199	1040310	1714510	0	45.963	16	9	17	9	9	0	342	1	85.4	0.389421	477.6	208	Q99KI0	Aconitate hydratase, mitochondrial OS=Mus musculus GN=Aco2 PE=1 SV=1	710
0.385	-0.1	0.82	-0.75	0.32	False		FALSE	FALSE	FALSE	0.135	2644050	3423560	6067610	0	45.74	36	5	22	5	5	0	565	1	15.9	0.646563	415.8	268.8	P08228	Superoxide dismutase [Cu-Zn] OS=Mus musculus GN=Sod1 PE=1 SV=2	150
0.325	0.4	0.55	0.11	0.36	False		FALSE	FALSE	FALSE	0.349	1923240	2525890	4449120	0	44.712	28	9	30	6	9	0	325	1	47.3	0.380711	486	198.6	Q99JY9	Actin-related protein 3 OS=Mus musculus GN=Actr3 PE=1 SV=3	807
0.105	-0.21	-0.63	0.31	-0.55	False		FALSE	FALSE	FALSE	-0.195	1728570	1710820	3439390	0	44.425	9	10	34	10	10	0	446	1	135.5	0.805833	282.2	403.2	Q921M3	Splicing factor 3B subunit 3 OS=Mus musculus GN=Sf3b3 PE=1 SV=1	921
0.095	0.18	1.35	-0.84	0.13	False		FALSE	FALSE	FALSE	0.183	1643300	2270660	3913970	0	44.424	29	10	29	7	10	0	217	1	50.5	0.682697	404.4	280.2	Q61598	Rab GDP dissociation inhibitor beta OS=Mus musculus GN=Gdi2 PE=1 SV=1	624
0.325	-0.03	0.43	-0.13	0.17	False		FALSE	FALSE	FALSE	0.153	1725510	2576590	4302100	0	44.155	40	3	27	3	3	0	687	1	9.1	0.671858	408.2	276.8	Q9CQR2	40S ribosomal protein S21 OS=Mus musculus GN=Rps21 PE=1 SV=1	33
-3.305	-5.2	-5.18	-3.54	-4.43	False		TRUE	TRUE	FALSE	-4.331	694339	45950	740289	0	44.027	74	6	88	1	1	0	1342	1	10.4	4.31e-06	12.4	674.6	A2AJ71	Far upstream element (FUSE)-binding protein 3 (Fragment) OS=Mus musculus GN=Fubp3 PE=1 SV=1	473
-0.095	1.62	-0.67	0.83	0.26	False		FALSE	FALSE	FALSE	0.389	549462	857033	1406490	0	43.106	16	7	16	7	7	0	314	1	57.4	0.564494	435.2	249.8	P80314	T-complex protein 1 subunit beta OS=Mus musculus GN=Cct2 PE=1 SV=4	453
0.325	0.05	1.26	-1.35	0.24	False		FALSE	FALSE	FALSE	0.105	1289330	1783020	3072340	0	42.202	26	8	23	0	8	0	309	1	40.4	0.657688	415.4	271	Q99K85	Phosphoserine aminotransferase OS=Mus musculus GN=Psat1 PE=1 SV=1	638
0.155	0.2	1.8	-2.02	0.17	False		FALSE	FALSE	FALSE	0.061	1439120	2005060	3444170	0	42.061	21	6	19	3	3	3	358	1	31.1	0.686723	404.2	281.4	Q9EST5	Acidic leucine-rich nuclear phosphoprotein 32 family member B OS=Mus musculus GN=Anp32b PE=1 SV=1	11
-0.115	0.49	0.23	1.21	0.07	False		FALSE	FALSE	FALSE	0.377	1000520	1657520	2658040	0	41.948	38	8	18	0	8	0	334	1	27.6	0.530861	443.4	242.4	Q9DCW4	Electron transfer flavoprotein subunit beta OS=Mus musculus GN=Etfb PE=1 SV=3	909
-0.505	-0.02	-0.65	1.31	-0.43	False		FALSE	FALSE	FALSE	-0.059	1967530	1908850	3876390	0	41.914	23	6	25	4	4	2	535	1	37.5	0.889844	294.6	390.8	P60335	Poly(rC)-binding protein 1 OS=Mus musculus GN=Pcbp1 PE=1 SV=1	496
0.025	0.54	0.48	1.19	0.26	False		FALSE	FALSE	FALSE	0.499	740202	1614860	2355060	0	41.52	17	7	21	6	7	0	458	1	51.5	0.359165	491.6	194	P30416	Peptidyl-prolyl cis-trans isomerase FKBP4 OS=Mus musculus GN=Fkbp4 PE=1 SV=5	418
0.075	0.17	2.45	-2.31	0.23	False		FALSE	FALSE	FALSE	0.123	941732	1747360	2689090	0	40.446	37	6	21	3	6	0	295	1	19.7	0.690159	400.8	284.6	P08030	Adenine phosphoribosyltransferase OS=Mus musculus GN=Aprt PE=1 SV=2	919
-0.395	-1.12	-0.85	0.71	-0.77	False		FALSE	FALSE	FALSE	-0.485	1500100	1060770	2560880	0	40.41	37	6	26	6	6	0	335	1	24.2	0.403129	217.8	468.8	P62242	40S ribosomal protein S8 OS=Mus musculus GN=Rps8 PE=1 SV=2	230
0.135	0.12	0.48	-1.41	0.3	False		FALSE	FALSE	FALSE	-0.075	1652170	2151730	3803900	0	40.14	26	9	22	0	9	0	326	1	38.7	0.778961	383.6	303	P07356	Annexin A2 OS=Mus musculus GN=Anxa2 PE=1 SV=2	681
-0.165	0.6	1.06	-1.52	-0.1	False		FALSE	FALSE	FALSE	-0.025	1575980	2350470	3926440	0	40.003	32	5	23	4	5	0	259	1	28.8	0.848338	361	323.8	Q9DBJ1	Phosphoglycerate mutase 1 OS=Mus musculus GN=Pgam1 PE=1 SV=3	390
0.455	0.00999999	0.94	-0.75	0.41	False		FALSE	FALSE	FALSE	0.213	1648590	2613800	4262390	0	39.887	32	6	25	0	6	0	404	1	17.3	0.502177	447.8	237.8	P54227	Stathmin OS=Mus musculus GN=Stmn1 PE=1 SV=2	670
2.115	0.84	0.76	1.81	0.79	False		TRUE	FALSE	TRUE	1.263	1826030	5356850	7182880	0	39.617	23	5	39	0	5	0	850	1	22.9	0.0148836	612	75.2	Q91V55	40S ribosomal protein S5 OS=Mus musculus GN=Rps5 PE=1 SV=1	774
0.055	-0.28	0.31	-0.72	0.05	False		FALSE	FALSE	FALSE	-0.117	2066060	2335400	4401460	0	39.573	19	6	38	0	5	1	897	1	36.2	0.981843	318.4	366.2	Q20BD0	Heterogeneous nuclear ribonucleoprotein A/B OS=Mus musculus GN=Hnrnpab PE=1 SV=1	657
0.125	-0.75	-0.8	0.77	-0.83	False		FALSE	FALSE	FALSE	-0.297	3270760	2455480	5726250	0	39.566	50	5	38	5	5	0	685	1	8.2	0.737718	269.4	416.4	Q9JJI8	60S ribosomal protein L38 OS=Mus musculus GN=Rpl38 PE=1 SV=3	451
0.195	0.16	-1.52	-2.12	0.08	False		FALSE	FALSE	FALSE	-0.641	1712440	1731810	3444250	0	39.507	22	7	19	3	7	0	424	1	35.7	0.802018	281.4	405.6	P45376	Aldose reductase OS=Mus musculus GN=Akr1b1 PE=1 SV=3	741
-0.315	0.59	0.07	1.41	0.27	False		FALSE	FALSE	FALSE	0.405	465542	562173	1027720	0	39.415	9	6	42	0	5	0	658	1	74.4	0.487011	453.4	230.4	Q3UUU2	Far upstream element-binding protein 1 OS=Mus musculus GN=Fubp1 PE=1 SV=1	658
0.105	-0.25	0.59	-1.11	-0.09	False		FALSE	FALSE	FALSE	-0.151	4378460	4767970	9146430	0	39.065	26	3	39	3	3	0	786	1	14.9	0.997817	316.4	370.6	P16045	Galectin-1 OS=Mus musculus GN=Lgals1 PE=1 SV=3	482
-0.055	0.27	-1.1	0.42	0.09	False		FALSE	FALSE	FALSE	-0.075	703748	396817	1100560	0	38.829	16	9	33	0	4	0	436	1	69.6	0.893763	350.2	335.6	Q7TMK9	Heterogeneous nuclear ribonucleoprotein Q OS=Mus musculus GN=Syncrip PE=1 SV=2	588
-0.915	-1.17	-0.88	0.41	-1.14	False		FALSE	FALSE	FALSE	-0.739	8806220	5155940	13962200	0	38.489	21	6	33	1	2	4	764	1	21.3	0.20766	176.6	509	P15864	Histone H1.2 OS=Mus musculus GN=Hist1h1c PE=1 SV=2	846
0.585	0.68	0.19	0.85	-0.25	False		FALSE	FALSE	FALSE	0.411	2200220	3917440	6117660	0	38.478	50	6	29	6	6	0	425	1	13.2	0.389421	478.4	207.4	P62869	Elongin-B OS=Mus musculus GN=Elob PE=1 SV=1	94
-0.175	0.15	0	0.47	0.15	False		FALSE	FALSE	FALSE	0.119	1122580	1301570	2424150	0	38.386	17	7	27	0	7	0	275	1	61.1	0.778961	382	303	Q8C483	Putative uncharacterized protein OS=Mus musculus GN=Sars PE=1 SV=1	424
0.255	0.53	0.93	-1.01	0.37	False		FALSE	FALSE	FALSE	0.215	377793	799099	1176890	0	38.157	21	6	15	0	6	0	311	1	30	0.476007	460	227.2	Q61792	LIM and SH3 domain protein 1 OS=Mus musculus GN=Lasp1 PE=1 SV=1	154
-0.185	-0.2	-1.12	0.22	-0.65	False		FALSE	FALSE	FALSE	-0.387	2273630	1405640	3679270	0	37.72	31	4	24	3	4	0	193	1	26.9	0.49229	233.2	453.2	O08583	THO complex subunit 4 OS=Mus musculus GN=Alyref PE=1 SV=3	877
-0.065	0.75	1.44	0.03	0.31	False		FALSE	FALSE	FALSE	0.493	43123.7	79660.3	122784	0	37.633	9	7	15	0	1	0	181	1	103	0.389421	478.4	207.8	Q7TPR4	Alpha-actinin-1 OS=Mus musculus GN=Actn1 PE=1 SV=1	809
-0.465	-2.63	-2.52	-3.54	-1.41	False		TRUE	TRUE	FALSE	-2.113	116836	34429.2	151265	0	37.224	6	6	88	1	1	0	2329	1	65.6	0.00565443	69.2	618	P04104	Keratin, type II cytoskeletal 1 OS=Mus musculus GN=Krt1 PE=1 SV=4	345
-0.185	0.44	0.33	-0.25	0.39	False		FALSE	FALSE	FALSE	0.145	281105	485723	766828	0	36.938	13	5	14	0	5	0	314	1	55.8	0.668027	413.6	273.6	P24547	Inosine-5'-monophosphate dehydrogenase 2 OS=Mus musculus GN=Impdh2 PE=1 SV=2	904
0.535	0.45	2.02	-1.32	0.41	False		FALSE	FALSE	FALSE	0.419	758560	1275200	2033760	0	36.855	24	7	14	3	7	0	299	1	36.4	0.332767	497.4	188.4	O35639	Annexin A3 OS=Mus musculus GN=Anxa3 PE=1 SV=4	23
0.115	0.14	0.14	-0.1	0.27	False		FALSE	FALSE	FALSE	0.113	1443700	1513950	2957650	0	36.845	14	6	21	6	6	0	311	1	44.7	0.686723	402	281.4	P61161	Actin-related protein 2 OS=Mus musculus GN=Actr2 PE=1 SV=1	361
0.595	-0.04	-0.38	0.85	-0.35	False		FALSE	FALSE	FALSE	0.135	4527740	6395960	10923700	0	36.757	38	5	31	0	5	0	661	1	14.8	0.753883	387.2	299.2	P62245	40S ribosomal protein S15a OS=Mus musculus GN=Rps15a PE=1 SV=2	820
-0.625	1.38	0	1.64	0.54	False		FALSE	FALSE	FALSE	0.587	639769	1115030	1754800	0	36.714	11	8	18	1	8	0	278	1	116.7	0.389421	476.4	208.6	Q80X50	Ubiquitin-associated protein 2-like OS=Mus musculus GN=Ubap2l PE=1 SV=1	602
-0.215	0.09	-0.51	0.37	-0.04	False		FALSE	FALSE	FALSE	-0.061	2256740	2091120	4347860	0	36.228	17	10	26	0	5	5	370	1	70.8	0.972114	323.6	363	Q8VHM5	Heterogeneous nuclear ribonucleoprotein R OS=Mus musculus GN=Hnrnpr PE=1 SV=1	159
-0.945	-1.4	-1.9	-0.82	-0.91	False		TRUE	TRUE	FALSE	-1.195	3729640	2152960	5882610	0	35.367	18	8	27	5	8	0	373	1	78.1	0.0350657	110.8	575.4	Q60865	Caprin-1 OS=Mus musculus GN=Caprin1 PE=1 SV=2	861
-0.755	-1.28	-2.05	-4.33	-1.01	False		TRUE	TRUE	FALSE	-1.885	5942680	1112600	7055280	0	35.347	40	6	128	4	4	2	1062	1	11.6	0.00826788	76.8	609.8	P62897	Cytochrome c, somatic OS=Mus musculus GN=Cycs PE=1 SV=2	487
-0.295	0.99	-0.22	0.33	0.18	False		FALSE	FALSE	FALSE	0.197	753941	841214	1595150	0	35.155	20	9	14	6	9	0	181	1	60.4	0.686723	402.8	282	P11983	T-complex protein 1 subunit alpha OS=Mus musculus GN=Tcp1 PE=1 SV=3	556
0.185	-0.3	0.29	-0.44	-0.32	False		FALSE	FALSE	FALSE	-0.117	2844930	3241840	6086780	0	34.799	59	3	25	3	3	0	375	1	7.3	0.995794	312.4	373.4	O08997	Copper transport protein ATOX1 OS=Mus musculus GN=Atox1 PE=1 SV=1	339
0.245	0.02	-0.22	1.17	0.24	False		FALSE	FALSE	FALSE	0.291	2141410	2843310	4984720	0	34.589	24	4	32	0	4	0	891	1	19.8	0.561148	437	248.6	Q3THE2	Myosin regulatory light chain 12B OS=Mus musculus GN=Myl12b PE=1 SV=2	306
-0.365	0.51	-0.06	0.06	0.15	False		FALSE	FALSE	FALSE	0.059	1028290	1052830	2081120	0	34.17	20	9	15	6	9	0	229	1	58	0.823863	374.6	312	P80317	T-complex protein 1 subunit zeta OS=Mus musculus GN=Cct6a PE=1 SV=3	688
0.055	-0.05	0.25	0.6	0.48	False		FALSE	FALSE	FALSE	0.267	382819	513098	895917	0	33.807	7	9	12	8	9	0	171	1	170	0.58568	430.6	255.2	Q8CGC7	Bifunctional glutamate/proline--tRNA ligase OS=Mus musculus GN=Eprs PE=1 SV=4	600
0.025	-0.46	-0.96	0.76	-0.51	False		FALSE	FALSE	FALSE	-0.229	4829920	4038890	8868810	0	33.425	17	6	31	0	6	0	512	1	23.1	0.743202	272.6	413.6	D3Z722	40S ribosomal protein S19 OS=Mus musculus GN=Rps19 PE=1 SV=1	252
0.095	0.42	-0.23	0.81	-0.86	False		FALSE	FALSE	FALSE	0.047	475250	803259	1278510	0	33.15	7	6	14	0	6	0	167	1	149.1	0.830146	371.8	314.2	Q6Y7W8	GRB10-interacting GYF protein 2 OS=Mus musculus GN=Gigyf2 PE=1 SV=2	837
-0.805	-1.2	-0.91	0.53	-1.12	False		FALSE	FALSE	FALSE	-0.701	850653	476871	1327520	0	33.122	17	5	27	1	1	0	817	1	22	0.232921	182.6	503.6	P43274	Histone H1.4 OS=Mus musculus GN=Hist1h1e PE=1 SV=2	6
0.285	0.18	1.06	-0.6	0.46	False		FALSE	FALSE	FALSE	0.277	406623	556092	962715	0	32.806	16	7	15	4	7	0	208	1	68.3	0.465287	461.2	224.6	P50516	V-type proton ATPase catalytic subunit A OS=Mus musculus GN=Atp6v1a PE=1 SV=2	212
0.225	0.22	0.23	0.7	-0.79	False		FALSE	FALSE	FALSE	0.117	865622	1393950	2259570	0	32.536	20	4	18	2	4	0	626	1	34.8	0.748374	388.4	295.8	Q8R4R6	Nucleoporin NUP53 OS=Mus musculus GN=Nup35 PE=1 SV=2	682
0.385	0.4	1.43	-1.81	0.19	False		FALSE	FALSE	FALSE	0.119	693056	1424100	2117160	0	32.389	19	7	13	2	7	0	218	1	62.7	0.551534	438.8	246.8	P06745	Glucose-6-phosphate isomerase OS=Mus musculus GN=Gpi PE=1 SV=4	289
-0.065	0.32	-1.11	0.14	0.1	False		FALSE	FALSE	FALSE	-0.123	440527	528573	969101	0	32.324	24	5	20	4	4	0	297	1	30.5	0.929588	340	345.8	Q9CX86	Heterogeneous nuclear ribonucleoprotein A0 OS=Mus musculus GN=Hnrnpa0 PE=1 SV=1	594
-0.135	-0.28	-0.8	0.63	-0.6	False		FALSE	FALSE	FALSE	-0.237	10445800	8779940	19225800	0	32.306	52	2	36	1	2	0	317	1	11.5	0.688491	262	425.4	P47955	60S acidic ribosomal protein P1 OS=Mus musculus GN=Rplp1 PE=1 SV=1	884
-0.165	0.31	-0.54	0.41	-0.09	False		FALSE	FALSE	FALSE	-0.015	624259	713655	1337910	0	32.189	20	6	13	4	6	0	159	1	50.2	0.918071	344	341.8	P60122	RuvB-like 1 OS=Mus musculus GN=Ruvbl1 PE=1 SV=1	193
-0.715	0.08	0.34	1.93	-0.6	False		FALSE	FALSE	FALSE	0.207	506622	612438	1119060	0	32.092	9	5	16	0	5	0	230	1	77.6	0.907764	347	338.8	Q9D0E1	Heterogeneous nuclear ribonucleoprotein M OS=Mus musculus GN=Hnrnpm PE=1 SV=3	748
-0.065	-0.19	0.43	-1.99	-0.22	False		FALSE	FALSE	FALSE	-0.407	829047	780046	1609090	0	31.813	11	4	12	0	4	0	436	1	44.7	0.716748	266	419.4	F8WIV2	Serine (or cysteine) peptidase inhibitor, clade B, member 6a OS=Mus musculus GN=Serpinb6a PE=1 SV=1	714
0.275	-0.08	-0.03	-0.95	0.28	False		FALSE	FALSE	FALSE	-0.101	710715	889501	1600220	0	31.727	21	4	22	0	3	0	300	1	24.9	0.847371	361.6	323.4	P63158	High mobility group protein B1 OS=Mus musculus GN=Hmgb1 PE=1 SV=2	207
0.355	0.18	0.36	-0.08	0.38	False		FALSE	FALSE	FALSE	0.239	1456830	2239240	3696060	0	31.658	17	5	19	0	5	0	272	1	41.5	0.487011	455.4	230.4	Q91Z25	Actin-related protein 2/3 complex subunit 1B OS=Mus musculus GN=Arpc1b PE=1 SV=1	236
-1.285	-1.57	-1.17	-0.85	-1.42	False		TRUE	TRUE	FALSE	-1.259	15145400	6962440	22107900	0	31.525	30	3	44	0	1	2	656	1	14.1	0.0272524	103.4	583.2	C0HKE5	Histone H2A type 1-G OS=Mus musculus GN=Hist1h2ag PE=1 SV=1	82
0.075	-0.11	1.68	-1.98	-0.08	False		FALSE	FALSE	FALSE	-0.083	697297	793393	1490690	0	31.114	28	5	13	5	5	0	284	1	24.6	0.950642	333	352.6	P00493	Hypoxanthine-guanine phosphoribosyltransferase OS=Mus musculus GN=Hprt1 PE=1 SV=3	100
0.845	-0.11	0.14	0.55	-4.15	False		FALSE	FALSE	FALSE	-0.545	277476	384599	662075	0	30.923	14	4	20	1	1	0	349	1	38.8	0.875188	354.4	331.6	Q9JKB3	Y-box-binding protein 3 OS=Mus musculus GN=Ybx3 PE=1 SV=2	38
0.065	-0.56	-0.09	-1.21	-0.2	False		FALSE	FALSE	FALSE	-0.399	916989	698018	1615010	0	30.384	28	5	15	1	5	0	302	1	29.3	0.610888	250.2	434.8	A2AMW0	Capping protein (Actin filament) muscle Z-line, beta, isoform CRA_a OS=Mus musculus GN=Capzb PE=1 SV=1	512
0.365	0.16	0.43	-0.43	0.32	False		FALSE	FALSE	FALSE	0.169	758751	1056670	1815420	0	30.281	17	4	15	0	4	0	406	1	36.7	0.562014	438	249	P19973	Lymphocyte-specific protein 1 OS=Mus musculus GN=Lsp1 PE=1 SV=2	408
0.465	0.44	1.76	-1.29	0.7	False		FALSE	FALSE	FALSE	0.415	1128200	1884530	3012720	0	30.133	19	5	17	0	5	0	230	1	40.6	0.323086	502.2	184.8	Q920E5	Farnesyl pyrophosphate synthase OS=Mus musculus GN=Fdps PE=1 SV=1	564
0.055	0.52	1.58	-0.02	0.38	False		FALSE	FALSE	FALSE	0.503	984850	1461880	2446730	0	30.118	36	6	19	1	6	0	342	1	21.8	0.380711	487.4	198.6	Q61171	Peroxiredoxin-2 OS=Mus musculus GN=Prdx2 PE=1 SV=3	797
0.565	0.54	3.37	-2.75	0.32	False		FALSE	FALSE	FALSE	0.409	439858	1190090	1629950	0	30.016	25	3	12	1	3	0	243	1	20.8	0.384694	485.6	201.6	P70296	Phosphatidylethanolamine-binding protein 1 OS=Mus musculus GN=Pebp1 PE=1 SV=3	278
-0.495	-1.14	-0.65	0.78	-0.55	False		FALSE	FALSE	FALSE	-0.411	2023410	1913090	3936500	0	29.774	27	5	24	0	5	0	449	1	21.6	0.46504	229	456.2	P35980	60S ribosomal protein L18 OS=Mus musculus GN=Rpl18 PE=1 SV=3	882
-1.145	0.00999999	0.57	0.22	0.35	False		FALSE	FALSE	FALSE	0.000999999	696214	695773	1391990	0	29.701	13	7	13	1	7	0	272	1	59.6	0.830146	371	315.4	P80313	T-complex protein 1 subunit eta OS=Mus musculus GN=Cct7 PE=1 SV=1	777
-0.065	-0.11	0.89	-0.89	-0.05	False		FALSE	FALSE	FALSE	-0.045	629384	630272	1259660	0	29.409	8	5	16	0	4	0	429	1	94.1	0.972114	325.4	361.6	Q3U2G2	Heat shock 70 kDa protein 4 OS=Mus musculus GN=Hspa4 PE=1 SV=1	285
-0.505	-1.25	-0.87	0.6	-0.75	False		FALSE	FALSE	FALSE	-0.555	870678	583743	1454420	0	29.166	18	6	15	3	6	0	209	1	46.1	0.303206	201.4	484.8	P27659	60S ribosomal protein L3 OS=Mus musculus GN=Rpl3 PE=1 SV=3	655
-0.255	-0.02	0.27	-1.28	0.16	False		FALSE	FALSE	FALSE	-0.225	1211050	1370680	2581730	0	28.891	16	6	12	6	6	0	333	1	52.7	0.980558	308.6	377.2	Q9D1A2	Cytosolic non-specific dipeptidase OS=Mus musculus GN=Cndp2 PE=1 SV=1	903
0.175	-0.11	0.07	-0.11	0.26	False		FALSE	FALSE	FALSE	0.057	648618	791210	1439830	0	28.702	14	7	14	6	7	0	147	1	67.5	0.80489	378.6	308.8	P29351	Tyrosine-protein phosphatase non-receptor type 6 OS=Mus musculus GN=Ptpn6 PE=1 SV=2	45
0.025	-1.43	-0.48	0.42	0.96	False		FALSE	FALSE	FALSE	-0.101	42610.5	46623.9	89234.5	0	28.379	12	6	14	0	1	0	230	1	72.2	0.918071	345	342	Q6PHQ9	Polyadenylate-binding protein OS=Mus musculus GN=Pabpc4 PE=1 SV=1	781
0.645	-0.08	0.12	0.48	-0.19	False		FALSE	FALSE	FALSE	0.195	3080270	4376110	7456380	0	28.379	16	7	23	0	7	0	348	1	65	0.686723	404	282.4	Q3U9N4	Granulins OS=Mus musculus GN=Grn PE=1 SV=1	838
0.075	-0.1	1.12	-1.45	-0.07	False		FALSE	FALSE	FALSE	-0.085	2890240	2305450	5195690	0	28.28	23	3	30	3	3	0	556	1	12.5	0.953983	332	353.8	P34884	Macrophage migration inhibitory factor OS=Mus musculus GN=Mif PE=1 SV=2	257
0.185	-0.17	-0.42	0.13	-0.28	False		FALSE	FALSE	FALSE	-0.111	1490760	1398080	2888840	0	28.256	43	5	22	1	5	0	351	1	14.3	0.9902	309.8	376	P56812	Programmed cell death protein 5 OS=Mus musculus GN=Pdcd5 PE=1 SV=3	577
-1.335	0.24	-0.4	0.86	0.05	False		FALSE	FALSE	FALSE	-0.117	2484450	3514650	5999100	0	28.101	21	4	22	0	4	0	482	1	20.3	0.92425	342	344	E9PYL9	Uncharacterized protein OS=Mus musculus GN=Gm10036 PE=3 SV=1	698
-0.795	-0.58	-0.52	2.06	-0.22	False		FALSE	FALSE	FALSE	-0.011	969600	809266	1778870	0	27.953	24	6	13	6	6	0	163	1	29.9	0.802018	281.4	405	P97351	40S ribosomal protein S3a OS=Mus musculus GN=Rps3a PE=1 SV=3	469
-0.245	-0.42	0.12	-1.24	0.00999999	False		FALSE	FALSE	FALSE	-0.355	638948	379764	1018710	0	27.583	7	5	11	0	4	1	194	1	96.3	0.65328	256.8	428.4	Q61699	Heat shock protein 105 kDa OS=Mus musculus GN=Hsph1 PE=1 SV=2	140
0.265	-0.41	-0.53	0.62	0.44	False		FALSE	FALSE	FALSE	0.077	341521	662098	1003620	0	27.387	23	5	9	1	5	0	115	1	34.4	0.738509	391.8	294	P47962	60S ribosomal protein L5 OS=Mus musculus GN=Rpl5 PE=1 SV=3	178
0.295	0.15	-0.1	0.09	-0.31	False		FALSE	FALSE	FALSE	0.025	1100340	1340760	2441110	0	27.304	12	6	18	1	6	0	309	1	47.6	0.847371	364.8	320.6	Q60972	Histone-binding protein RBBP4 OS=Mus musculus GN=Rbbp4 PE=1 SV=5	779
0.145	-0.59	-0.93	-0.33	-0.33	False		FALSE	FALSE	FALSE	-0.407	1555360	1401120	2956480	0	27.163	28	5	21	5	5	0	377	1	23.5	0.541731	241.2	444.8	Q9D1J3	SAP domain-containing ribonucleoprotein OS=Mus musculus GN=Sarnp PE=1 SV=3	50
0.185	-0.64	0.04	0.7	-0.22	False		FALSE	FALSE	FALSE	0.013	1810430	2074840	3885270	0	27.154	14	3	19	0	3	0	584	1	26.9	0.918071	344	342.2	F8WHQ1	Tumor protein D52 OS=Mus musculus GN=Tpd52 PE=1 SV=1	182
-0.725	-1.22	-0.65	-0.43	-1.22	False		FALSE	FALSE	FALSE	-0.849	331806	234381	566186	0	27.121	30	3	37	0	1	0	474	1	14.1	0.116718	148.6	538	Q6GSS7	Histone H2A type 2-A OS=Mus musculus GN=Hist2h2aa1 PE=1 SV=3	922
0.245	0.5	2.06	-0.98	0.48	False		FALSE	FALSE	FALSE	0.461	399815	785459	1185270	0	27.03	10	5	9	5	5	0	121	1	64.2	0.380711	487.8	199	Q9CWJ9	Bifunctional purine biosynthesis protein PURH OS=Mus musculus GN=Atic PE=1 SV=2	567
0.095	0	0.85	-0.9	0.06	False		FALSE	FALSE	FALSE	0.021	1810360	2118590	3928950	0	26.997	42	4	19	4	4	0	560	1	11	0.848529	362.2	324.2	Q64433	10 kDa heat shock protein, mitochondrial OS=Mus musculus GN=Hspe1 PE=1 SV=2	592
-0.035	0.1	0.26	-0.25	0.03	False		FALSE	FALSE	FALSE	0.021	2694570	1863350	4557920	0	26.945	20	4	24	1	4	0	430	1	24.7	0.880315	352.4	332.8	O70251	Elongation factor 1-beta OS=Mus musculus GN=Eef1b PE=1 SV=5	636
0.455	0.25	3.05	-0.03	0.33	False		FALSE	FALSE	FALSE	0.811	358651	613631	972282	0	26.929	21	5	15	0	2	0	304	1	28.5	0.23888	521.2	166	O35381	Acidic leucine-rich nuclear phosphoprotein 32 family member A OS=Mus musculus GN=Anp32a PE=1 SV=1	795
-1.145	-1.51	-1.48	-0.57	-1.47	False		TRUE	TRUE	FALSE	-1.235	2058040	1198460	3256500	0	26.78	13	6	21	4	4	2	255	1	63.9	0.033504	109.4	577	Q8BYK6	YTH domain-containing family protein 3 OS=Mus musculus GN=Ythdf3 PE=1 SV=2	423
-10.025	-9.5	-9.2	-9.95	-8.39	False		TRUE	TRUE	FALSE	-9.413	20849100	42164.7	20891300	0	26.69	6	7	42	1	1	0	613	1	62.8	1.88e-09	2	685	Q3UV17	Keratin, type II cytoskeletal 2 oral OS=Mus musculus GN=Krt76 PE=1 SV=1	597
-0.325	0.02	1	-1.21	-0.34	False		FALSE	FALSE	FALSE	-0.171	1019850	1799230	2819080	0	26.584	19	7	10	2	7	0	171	1	36.1	0.889844	294.2	392.2	P45377	Aldose reductase-related protein 2 OS=Mus musculus GN=Akr1b8 PE=1 SV=2	756
-0.435	0.1	-0.65	1.13	-0.94	False		FALSE	FALSE	FALSE	-0.159	2213580	2248850	4462430	0	26.444	40	5	21	0	3	3	214	1	9.5	0.857391	289.2	397	Q6ZWU9	40S ribosomal protein S27 OS=Mus musculus GN=Rps27 PE=1 SV=3	391
-0.115	-0.03	0.35	-0.04	-0.08	False		FALSE	FALSE	FALSE	0.017	637881	758236	1396120	0	26.398	23	5	15	5	5	0	340	1	37.3	0.937763	338.2	348.4	P10605	Cathepsin B OS=Mus musculus GN=Ctsb PE=1 SV=2	42
0.205	0.08	0.95	-1.85	0.09	False		FALSE	FALSE	FALSE	-0.105	1441970	1154770	2596740	0	26.273	14	5	14	3	5	0	299	1	47.7	0.84141	367.6	317.8	P50247	Adenosylhomocysteinase OS=Mus musculus GN=Ahcy PE=1 SV=3	417
-0.875	-0.34	-1.37	0.44	-0.45	False		FALSE	FALSE	FALSE	-0.519	378413	296155	674568	0	26.006	15	4	18	1	2	0	342	1	38.2	0.377629	213.8	471.6	Q61990	Poly(rC)-binding protein 2 OS=Mus musculus GN=Pcbp2 PE=1 SV=1	54
0.275	0.64	0.22	0.34	0.48	False		FALSE	FALSE	FALSE	0.391	423513	597461	1020970	0	25.829	15	6	14	5	6	0	153	1	56.5	0.324583	500	186.2	P62814	V-type proton ATPase subunit B, brain isoform OS=Mus musculus GN=Atp6v1b2 PE=1 SV=1	199
-0.055	0.19	-0.05	1.03	0.14	False		FALSE	FALSE	FALSE	0.251	594379	671350	1265730	0	25.758	18	5	8	1	5	0	162	1	40.7	0.646563	419	268.4	Q9CZ44	NSFL1 cofactor p47 OS=Mus musculus GN=Nsfl1c PE=1 SV=1	673
0.265	0.73	0.96	-0.24	0.25	False		FALSE	FALSE	FALSE	0.393	437582	674029	1111610	0	25.705	5	6	11	0	6	0	176	1	191.9	0.389421	481.2	204	Q5SXR6	Clathrin heavy chain OS=Mus musculus GN=Cltc PE=1 SV=1	273
0.355	0.23	0.77	-0.86	0.4	False		FALSE	FALSE	FALSE	0.179	773263	850219	1623480	0	25.528	15	7	10	6	7	0	153	1	61.3	0.501402	448.8	237.4	P26443	Glutamate dehydrogenase 1, mitochondrial OS=Mus musculus GN=Glud1 PE=1 SV=1	67
0.245	0.11	0.21	-0.03	0.16	False		FALSE	FALSE	FALSE	0.139	1569590	1710410	3280000	0	25.392	39	4	13	1	4	0	129	1	16.3	0.675449	408.8	278.4	Q9CPW4	Actin-related protein 2/3 complex subunit 5 OS=Mus musculus GN=Arpc5 PE=1 SV=3	432
1.775	1.42	0.92	1.78	0.72	False		TRUE	FALSE	TRUE	1.323	632268	1968680	2600950	0	25.38	11	6	16	1	6	0	299	1	73.1	0.00790436	623.2	63.2	Q62167	ATP-dependent RNA helicase DDX3X OS=Mus musculus GN=Ddx3x PE=1 SV=3	532
-0.485	0.29	-0.34	0.72	0.09	False		FALSE	FALSE	FALSE	0.055	952092	1036640	1988730	0	25.289	15	5	14	0	5	0	231	1	51	0.847371	365.6	321.2	Q9Z0N1	Eukaryotic translation initiation factor 2 subunit 3, X-linked OS=Mus musculus GN=Eif2s3x PE=1 SV=2	570
0.105	-0.22	-0.77	0.59	-0.33	False		FALSE	FALSE	FALSE	-0.125	521533	509576	1031110	0	25.268	3	4	14	0	4	0	390	1	149.6	0.928569	301.6	385.8	E9QNN1	ATP-dependent RNA helicase A OS=Mus musculus GN=Dhx9 PE=1 SV=1	656
-0.415	-0.67	-1.66	-0.1	-0.48	False		FALSE	FALSE	FALSE	-0.665	826047	683778	1509830	0	25.251	16	6	12	6	6	0	138	1	56.3	0.228536	180.8	504	P56480	ATP synthase subunit beta, mitochondrial OS=Mus musculus GN=Atp5b PE=1 SV=2	340
-0.555	-1.23	-2.27	0.49	-0.78	False		FALSE	FALSE	FALSE	-0.869	1367010	764108	2131110	0	24.996	25	5	20	0	5	0	216	1	30.4	0.20748	176.2	510.8	A0A140T8L1	Uncharacterized protein OS=Mus musculus GN=Rpl7a-ps3 PE=4 SV=1	413
-1.355	-0.87	-0.75	-1.06	-0.39	False		FALSE	FALSE	FALSE	-0.885	227430	223746	451176	0	24.908	9	4	9	0	4	0	125	1	52.6	0.105465	144.4	541.8	P56959	RNA-binding protein FUS OS=Mus musculus GN=Fus PE=1 SV=1	166
0.295	2.96	0.59	-0.55	0.38	False		FALSE	FALSE	FALSE	0.735	461839	1500830	1962670	0	24.801	12	6	12	4	6	0	144	1	66.4	0.356008	493.8	192.8	O88342	WD repeat-containing protein 1 OS=Mus musculus GN=Wdr1 PE=1 SV=3	91
-0.115	-0.2	0.27	-0.66	0.00999999	False		FALSE	FALSE	FALSE	-0.139	573273	713769	1287040	0	24.66	9	3	29	0	2	0	712	1	38.3	0.944124	303.4	383.8	Q60668	Heterogeneous nuclear ribonucleoprotein D0 OS=Mus musculus GN=Hnrnpd PE=1 SV=2	36
0.075	0.64	1.29	-0.52	0.28	False		FALSE	FALSE	FALSE	0.353	347097	422005	769102	0	24.58	13	6	10	5	6	0	131	1	56.6	0.468169	461.8	225.6	Q3TW96	UDP-N-acetylhexosamine pyrophosphorylase-like protein 1 OS=Mus musculus GN=Uap1l1 PE=1 SV=1	75
-0.305	0.18	0.61	3.53	-0.41	False		FALSE	FALSE	FALSE	0.721	583497	816696	1400190	0	24.576	25	7	10	2	7	0	189	1	29.6	0.690159	402.2	285.2	P62702	40S ribosomal protein S4, X isoform OS=Mus musculus GN=Rps4x PE=1 SV=2	625
0.375	-0.07	0.45	0.67	0.1	False		FALSE	FALSE	FALSE	0.305	2954730	4351490	7306220	0	24.56	36	3	17	0	3	0	613	1	7.8	0.551534	438.6	247	P62858	40S ribosomal protein S28 OS=Mus musculus GN=Rps28 PE=1 SV=1	894
0.125	0.1	0.87	-0.38	0.29	False		FALSE	FALSE	FALSE	0.201	545659	831442	1377100	0	24.469	15	3	7	1	3	0	271	1	26.4	0.620334	422.6	263.4	Q9Z2U1	Proteasome subunit alpha type-5 OS=Mus musculus GN=Psma5 PE=1 SV=1	297
-0.105	0.03	-0.66	1.2	-0.24	False		FALSE	FALSE	FALSE	0.045	2539190	3371720	5910900	0	24.33	20	3	19	3	3	0	622	1	14.8	0.943105	335.8	349.4	P67984	60S ribosomal protein L22 OS=Mus musculus GN=Rpl22 PE=1 SV=2	271
0.225	0.34	0.92	-0.78	0.23	False		FALSE	FALSE	FALSE	0.187	1288220	1807480	3095700	0	24.221	17	5	17	0	5	0	140	1	44.9	0.564494	435.4	250.8	P18242	Cathepsin D OS=Mus musculus GN=Ctsd PE=1 SV=1	724
0.205	-0.33	-0.46	0.16	-0.28	False		FALSE	FALSE	FALSE	-0.141	1464600	1450930	2915530	0	23.85	32	3	18	3	3	0	234	1	13.9	0.944124	304	381.4	P62320	Small nuclear ribonucleoprotein Sm D3 OS=Mus musculus GN=Snrpd3 PE=1 SV=1	134
0.095	-0.1	-0.55	0.17	-0.01	False		FALSE	FALSE	FALSE	-0.079	979548	1086310	2065860	0	23.788	8	3	17	3	3	0	224	1	68.8	0.981843	320.8	366.4	Q8BGD9	Eukaryotic translation initiation factor 4B OS=Mus musculus GN=Eif4b PE=1 SV=1	249
-0.555	-1.08	-0.77	1	-0.69	False		FALSE	FALSE	FALSE	-0.419	1547520	1111190	2658720	0	23.71	17	4	16	4	4	0	387	1	28.7	0.464396	228.6	458	P62754	40S ribosomal protein S6 OS=Mus musculus GN=Rps6 PE=1 SV=1	284
0.115	0.14	0.4	-0.18	0.21	False		FALSE	FALSE	FALSE	0.137	1157040	1546320	2703360	0	23.672	23	4	21	2	4	0	362	1	19.7	0.690159	402.8	284.2	P59999	Actin-related protein 2/3 complex subunit 4 OS=Mus musculus GN=Arpc4 PE=1 SV=3	197
-0.285	-0.4	-0.04	1.33	-0.52	False		FALSE	FALSE	FALSE	0.017	1340790	1214080	2554870	0	23.61	28	5	16	0	5	0	230	1	17.7	0.972588	307	378.4	A0A140T8M7	Uncharacterized protein OS=Mus musculus GN=Rpl23a-ps3 PE=3 SV=1	531
-0.455	-1.01	-0.63	0.75	-0.79	False		FALSE	FALSE	FALSE	-0.427	1049370	718333	1767700	0	23.536	15	5	17	5	5	0	266	1	47.1	0.4368	224.6	461.6	Q9D8E6	60S ribosomal protein L4 OS=Mus musculus GN=Rpl4 PE=1 SV=3	164
0.395	0.05	0.84	-0.95	0.4	False		FALSE	FALSE	FALSE	0.147	502440	718782	1221220	0	23.088	17	4	12	0	4	0	256	1	28.3	0.564494	435.2	250.2	H7BX95	Serine/arginine-rich-splicing factor 1 OS=Mus musculus GN=Srsf1 PE=1 SV=1	486
-1.755	-0.65	-1.41	0.55	-0.1	False		FALSE	FALSE	FALSE	-0.673	387592	182667	570259	0	23.011	13	4	8	3	4	0	163	1	40.7	0.367746	211.6	474	O35226	26S proteasome non-ATPase regulatory subunit 4 OS=Mus musculus GN=Psmd4 PE=1 SV=1	133
0.045	-0.13	1.72	-2.18	0.02	False		FALSE	FALSE	FALSE	-0.105	968219	1173400	2141620	0	22.766	17	3	10	3	3	0	255	1	19.5	0.951257	333	353	P63028	Translationally-controlled tumor protein OS=Mus musculus GN=Tpt1 PE=1 SV=1	93
-1.575	-1.28	0.52	-2.11	-1.24	False		FALSE	FALSE	FALSE	-1.137	945108	912564	1857670	0	22.47	12	6	15	6	6	0	163	1	55.7	0.117479	149.4	537.6	Q9CZN7	Serine hydroxymethyltransferase OS=Mus musculus GN=Shmt2 PE=1 SV=1	620
0.645	-0.25	-0.06	0.24	-0.28	False		FALSE	FALSE	FALSE	0.059	552923	966817	1519740	0	22.332	39	4	17	4	4	0	142	1	12.4	0.847371	365.8	322.6	P83870	PHD finger-like domain-containing protein 5A OS=Mus musculus GN=Phf5a PE=1 SV=1	183
-0.045	0	-0.87	-0.4	-0.15	False		FALSE	FALSE	FALSE	-0.293	493792	539121	1032910	0	22.176	33	4	9	4	4	0	139	1	20	0.737718	269.4	415.6	Q6PGH2	Hematological and neurological expressed 1-like protein OS=Mus musculus GN=Hn1l PE=1 SV=1	706
-0.045	-0.12	0	-0.01	-0.15	False		FALSE	FALSE	FALSE	-0.065	1181570	1316100	2497660	0	22.08	29	5	16	0	4	1	297	1	32.9	0.995794	313.4	372.8	P47753	F-actin-capping protein subunit alpha-1 OS=Mus musculus GN=Capza1 PE=1 SV=4	173
0.145	-0.39	-0.56	0.11	-0.14	False		FALSE	FALSE	FALSE	-0.167	1605710	1724010	3329730	0	22.004	41	4	16	2	4	0	463	1	13.5	0.895662	297	389.6	P62317	Small nuclear ribonucleoprotein Sm D2 OS=Mus musculus GN=Snrpd2 PE=1 SV=1	222
0.375	0.5	1.05	0.22	0.27	False		FALSE	FALSE	FALSE	0.483	343715	816203	1159920	0	21.961	15	6	12	5	6	0	167	1	55.9	0.287757	509.6	176.6	Q8BK67	Protein RCC2 OS=Mus musculus GN=Rcc2 PE=1 SV=1	347
-0.735	-0.5	-1.26	0.87	-0.57	False		FALSE	FALSE	FALSE	-0.439	1509670	770286	2279950	0	21.914	6	3	16	3	3	0	189	1	55.2	0.430783	223.6	462	Q99KP6	Pre-mRNA-processing factor 19 OS=Mus musculus GN=Prpf19 PE=1 SV=1	74
-0.225	-0.5	-0.4	0.78	0.11	False		FALSE	FALSE	FALSE	-0.047	968855	655340	1624190	0	21.757	16	5	12	5	5	0	240	1	36.1	0.981843	320.6	366.2	Q6ZWX6	Eukaryotic translation initiation factor 2 subunit 1 OS=Mus musculus GN=Eif2s1 PE=1 SV=3	429
-0.055	-0.61	-0.03	-1.71	-0.52	False		FALSE	FALSE	FALSE	-0.585	2238480	1777180	4015660	0	21.679	8	2	21	0	2	0	417	1	33.4	0.367746	211.6	475.6	Q9EQU5	Protein SET OS=Mus musculus GN=Set PE=1 SV=1	740
0.395	-0.29	-0.5	0.57	-0.53	False		FALSE	FALSE	FALSE	-0.071	1482830	1526940	3009770	0	21.549	49	5	15	5	5	0	204	1	12.8	0.96342	328.2	357	P62889	60S ribosomal protein L30 OS=Mus musculus GN=Rpl30 PE=1 SV=2	566
0.055	0.08	-0.41	0.55	-0.22	False		FALSE	FALSE	FALSE	0.011	639112	675679	1314790	0	21.465	6	5	11	0	4	0	122	1	109.4	0.92657	342.4	344.8	A2AH85	116 kDa U5 small nuclear ribonucleoprotein component OS=Mus musculus GN=Eftud2 PE=1 SV=1	895
0.085	-0.38	0.51	-0.69	0.3	False		FALSE	FALSE	FALSE	-0.035	439075	297972	737047	0	21.267	6	6	8	0	6	0	135	1	120.7	0.869111	358.4	328.8	Q3V117	ATP-citrate synthase OS=Mus musculus GN=Acly PE=1 SV=1	770
0.065	0.23	1.57	-1.16	-0.09	False		FALSE	FALSE	FALSE	0.123	21578700	2008010	23586700	0	21.214	42	5	16	2	5	0	195	1	15.9	0.800669	380.4	307.2	Q9CQI6	Coactosin-like protein OS=Mus musculus GN=Cotl1 PE=1 SV=3	614
0.595	0.59	-0.56	3.16	0.61	False		FALSE	FALSE	FALSE	0.879	281530	546728	828259	0	21.208	24	4	9	0	4	0	241	1	17.7	0.180009	535	152	F6YVP7	Uncharacterized protein OS=Mus musculus GN=Gm10260 PE=3 SV=2	360
-2.365	-1.45	-1.78	-0.84	-1.74	False		TRUE	TRUE	FALSE	-1.635	391207	134097	525304	0	21.201	8	4	12	1	2	0	156	1	62.2	0.0115723	83.4	603.2	Q91YT7	YTH domain-containing family protein 2 OS=Mus musculus GN=Ythdf2 PE=1 SV=1	274
-1.795	-1.16	-1.9	-1.65	-0.65	False		TRUE	TRUE	FALSE	-1.431	531927	198218	730145	0	21.153	6	6	13	0	6	0	150	1	115.2	0.0154333	89.6	597.2	A0A0U1RPL0	Ataxin-2-like protein OS=Mus musculus GN=Atxn2l PE=1 SV=1	727
-0.675	0.04	-0.63	0.78	0.11	False		FALSE	FALSE	FALSE	-0.075	399205	316392	715597	0	21.121	9	4	6	3	4	0	103	1	59.4	0.972114	327	360.4	O70145	Neutrophil cytosol factor 2 OS=Mus musculus GN=Ncf2 PE=1 SV=1	332
-0.105	-0.4	-0.31	0.08	-0.69	False		FALSE	FALSE	FALSE	-0.285	1501370	714479	2215850	0	21.011	25	3	17	1	3	0	215	1	16.5	0.612301	251	435.4	Q8BMJ3	Eukaryotic translation initiation factor 1A, X-chromosomal OS=Mus musculus GN=Eif1ax PE=2 SV=3	404
0.135	-0.36	-0.79	0.49	1.73	False		FALSE	FALSE	FALSE	0.241	1058660	1012720	2071380	0	20.767	6	5	11	0	5	0	224	1	90.9	0.790795	382.2	305.4	O35286	Pre-mRNA-splicing factor ATP-dependent RNA helicase DHX15 OS=Mus musculus GN=Dhx15 PE=1 SV=2	232
0.655	0.45	2.07	-0.76	0.59	False		FALSE	FALSE	FALSE	0.601	563681	1062040	1625720	0	20.737	27	5	10	0	5	0	144	1	24.9	0.204165	526.2	159.8	O08709	Peroxiredoxin-6 OS=Mus musculus GN=Prdx6 PE=1 SV=3	571
0.405	0.41	0.12	0.38	0.35	False		FALSE	FALSE	FALSE	0.333	378649	530634	909283	0	20.598	14	3	15	1	1	0	179	1	28	0.380711	489.8	196.8	A6PWS5	Gelsolin (Fragment) OS=Mus musculus GN=Gsn PE=1 SV=1	430
0.495	0	-0.29	1.09	-0.46	False		FALSE	FALSE	FALSE	0.167	768723	944475	1713200	0	20.391	31	5	19	0	5	0	263	1	22.1	0.738509	393	293.4	P62082	40S ribosomal protein S7 OS=Mus musculus GN=Rps7 PE=2 SV=1	472
0.575	1.01	2.3	-0.76	0.93	False		FALSE	FALSE	FALSE	0.811	237937	635589	873526	0	20.204	13	6	7	0	6	0	105	1	55.9	0.147753	547.8	138.8	Q3U367	4-trimethylaminobutyraldehyde dehydrogenase OS=Mus musculus GN=Aldh9a1 PE=1 SV=1	200
1.775	0.14	1.58	4.01	0.28	False		FALSE	FALSE	FALSE	1.557	467794	1795780	2263570	0	20.08	24	3	15	0	3	0	395	1	13.7	0.0637029	577.6	110.2	P62852	40S ribosomal protein S25 OS=Mus musculus GN=Rps25 PE=1 SV=1	632
0.195	0.05	3.23	-1.79	0.61	False		FALSE	FALSE	FALSE	0.459	970162	1464670	2434840	0	20.03	23	4	13	1	4	0	76	1	22.8	0.561148	439.2	248.6	Q61599	Rho GDP-dissociation inhibitor 2 OS=Mus musculus GN=Arhgdib PE=1 SV=3	41
0.045	0.05	0.46	0.52	-0.02	False		FALSE	FALSE	FALSE	0.211	372153	693338	1065490	0	19.876	23	3	7	1	3	0	266	1	16.5	0.738509	394.8	293	O70591	Prefoldin subunit 2 OS=Mus musculus GN=Pfdn2 PE=1 SV=2	811
0.585	0.09	0.59	0.33	0.25	False		FALSE	FALSE	FALSE	0.369	815419	1314060	2129480	0	19.666	19	3	16	0	3	0	225	1	20	0.39169	477.2	209.8	Q99LX0	Protein DJ-1 OS=Mus musculus GN=Park7 PE=1 SV=1	395
-0.505	-1.4	-0.92	0.68	-0.97	False		FALSE	FALSE	FALSE	-0.623	1525180	875037	2400220	0	19.648	16	3	12	2	3	0	328	1	23.5	0.284189	196.6	489.8	Q9CR57	60S ribosomal protein L14 OS=Mus musculus GN=Rpl14 PE=1 SV=3	559
-0.625	-1.03	0.65	-3.31	-0.72	False		FALSE	FALSE	FALSE	-1.007	664048	462476	1126520	0	19.534	21	4	8	0	4	0	65	1	32.8	0.232921	182.6	503.6	H3BKH6	S-formylglutathione hydrolase OS=Mus musculus GN=Esd PE=1 SV=1	587
0.245	0.56	0.05	-2.04	0.43	False		FALSE	FALSE	FALSE	-0.151	349652	687227	1036880	0	19.411	18	3	8	3	3	0	112	1	28.7	0.675174	409.2	277.8	Q9QYB1	Chloride intracellular channel protein 4 OS=Mus musculus GN=Clic4 PE=1 SV=3	816
-0.915	0.33	-1.77	1.1	0.27	False		FALSE	FALSE	FALSE	-0.197	357797	221318	579115	0	19.363	12	5	5	4	5	0	112	1	58.4	0.869111	357.2	329.2	Q9CWK8	Sorting nexin-2 OS=Mus musculus GN=Snx2 PE=1 SV=2	499
0.045	-2.51	0.44	-0.39	-0.21	False		FALSE	FALSE	FALSE	-0.525	1520330	1784400	3304730	0	19.24	30	3	16	3	3	0	401	1	11.7	0.743202	272.6	414.4	P10639	Thioredoxin OS=Mus musculus GN=Txn PE=1 SV=3	744
-0.415	-0.3	-0.54	0.22	-0.16	False		FALSE	FALSE	FALSE	-0.239	511559	562109	1073670	0	19.157	22	7	9	2	5	2	53	1	41.2	0.684119	260.6	426.4	P63085	Mitogen-activated protein kinase 1 OS=Mus musculus GN=Mapk1 PE=1 SV=3	521
-0.005	0.00999999	0.77	-1.76	0.37	False		FALSE	FALSE	FALSE	-0.123	710104	874257	1584360	0	19.087	14	3	11	1	3	0	163	1	27.8	0.847371	365.4	322.4	Q9Z2U0	Proteasome subunit alpha type-7 OS=Mus musculus GN=Psma7 PE=1 SV=1	147
-0.685	-0.65	-1.58	-0.17	-0.4	False		FALSE	FALSE	FALSE	-0.697	611024	517995	1129020	0	18.876	30	3	18	3	3	0	238	1	22.1	0.196691	173.2	512.8	Q91XV3	Brain acid soluble protein 1 OS=Mus musculus GN=Basp1 PE=1 SV=3	798
0.215	-0.00999999	4.15	-2.42	0.36	False		FALSE	FALSE	FALSE	0.459	546301	877142	1423440	0	18.858	31	2	9	1	2	0	262	1	10.5	0.658739	416	271.4	Q91VW3	SH3 domain-binding glutamic acid-rich-like protein 3 OS=Mus musculus GN=Sh3bgrl3 PE=1 SV=1	426
-1.715	-0.67	-1.14	-0.53	-0.66	False		FALSE	FALSE	FALSE	-0.943	648082	334261	982343	0	18.814	6	3	5	3	3	0	140	1	71.3	0.0859471	137.4	548.2	Q8K2Q9	Shootin-1 OS=Mus musculus GN=Shtn1 PE=1 SV=1	253
-0.705	0.24	-0.74	0.55	-0.05	False		FALSE	FALSE	FALSE	-0.141	1006830	977546	1984380	0	18.691	13	2	13	2	2	0	227	1	22	0.995794	313.8	373.6	Q64152	Transcription factor BTF3 OS=Mus musculus GN=Btf3 PE=1 SV=3	551
0.155	-0.09	-0.22	0.92	-0.46	False		FALSE	FALSE	FALSE	0.061	771202	736681	1507880	0	18.659	12	3	18	0	3	0	299	1	17.2	0.88959	351	334.8	P61255	60S ribosomal protein L26 OS=Mus musculus GN=Rpl26 PE=1 SV=1	652
-0.195	0.06	1.76	-2.11	0	False		FALSE	FALSE	FALSE	-0.097	307765	297954	605718	0	18.552	13	3	9	2	3	0	187	1	33.5	0.959094	331.6	355	Q9CY64	Biliverdin reductase A OS=Mus musculus GN=Blvra PE=1 SV=1	414
0.395	0.2	1.53	-0.44	0.16	False		FALSE	FALSE	FALSE	0.369	426673	547255	973928	0	18.367	17	5	8	2	5	0	80	1	46.2	0.472514	460.2	226.4	P05201	Aspartate aminotransferase, cytoplasmic OS=Mus musculus GN=Got1 PE=1 SV=3	262
0.055	-0.2	-0.27	0.67	-0.28	False		FALSE	FALSE	FALSE	-0.005	592556	705873	1298430	0	18.331	10	4	14	0	4	0	263	1	47.7	0.972114	326	362.8	P32067	Lupus La protein homolog OS=Mus musculus GN=Ssb PE=1 SV=1	55
-0.375	-0.5	-1.07	-0.38	-0.72	False		FALSE	FALSE	FALSE	-0.609	476006	368105	844111	0	18.279	4	4	10	0	4	0	226	1	145.7	0.220952	179.2	508	G5E866	Splicing factor 3B subunit 1 OS=Mus musculus GN=Sf3b1 PE=1 SV=1	286
0.065	-0.2	-0.41	-0.25	0.34	False		FALSE	FALSE	FALSE	-0.091	752457	794669	1547130	0	18.218	7	3	14	1	3	0	280	1	39	0.950596	337.8	350.8	Q3TWW8	Serine/arginine-rich splicing factor 6 OS=Mus musculus GN=Srsf6 PE=1 SV=1	444
-1.715	0.6	-0.63	0.83	-0.39	False		FALSE	FALSE	FALSE	-0.261	634618	572081	1206700	0	18.21	2	3	8	0	3	0	144	1	197.2	0.995794	313.4	374.4	A0A1B0GSX7	Nuclear pore complex protein Nup98-Nup96 OS=Mus musculus GN=Nup98 PE=1 SV=1	704
-0.015	0.07	0.02	-0.16	-0.29	False		FALSE	FALSE	FALSE	-0.075	532547	619403	1151950	0	18.149	5	3	6	0	3	0	70	1	71.2	0.985437	319.2	367.6	Q8R2P8	Lysine--tRNA ligase OS=Mus musculus GN=Kars PE=1 SV=1	281
-1.025	0.34	-0.16	0.16	-0.48	False		FALSE	FALSE	FALSE	-0.233	284126	332920	617046	0	18.132	12	4	6	1	4	0	170	1	48.1	0.889844	293.6	392.8	Q922R8	Protein disulfide-isomerase A6 OS=Mus musculus GN=Pdia6 PE=1 SV=3	16
-0.135	0.51	0.87	-0.86	0.4	False		FALSE	FALSE	FALSE	0.157	273965	453226	727192	0	18.032	47	5	7	5	5	0	74	1	15.1	0.629358	423.8	265	Q05816	Fatty acid-binding protein, epidermal OS=Mus musculus GN=Fabp5 PE=1 SV=3	283
-0.255	-0.14	-0.46	1.26	-0.91	False		FALSE	FALSE	FALSE	-0.101	162763	184590	347353	0	18.026	38	3	17	0	1	0	178	1	9.5	0.84919	287.2	398.8	Q6ZWY3	40S ribosomal protein S27-like OS=Mus musculus GN=Rps27l PE=1 SV=3	80
0.275	0.57	0.84	5.52	0.97	False		FALSE	FALSE	FALSE	1.635	99433.2	471343	570776	0	17.952	21	3	4	3	3	0	121	1	16.4	0.0529416	583.8	103.2	P14131	40S ribosomal protein S16 OS=Mus musculus GN=Rps16 PE=1 SV=4	886
0.685	-0.1	1.29	-0.65	1.03	False		FALSE	FALSE	FALSE	0.451	525197	997799	1523000	0	17.95	13	3	7	3	3	0	124	1	25.4	0.419449	472	215.8	Q60692	Proteasome subunit beta type-6 OS=Mus musculus GN=Psmb6 PE=1 SV=3	692
-0.345	-0.6	1.08	1.94	0.16	False		FALSE	FALSE	FALSE	0.447	98643.5	185866	284509	0	17.519	13	3	4	3	3	0	107	1	38	0.69702	401.2	286.2	Q9DCH4	Eukaryotic translation initiation factor 3 subunit F OS=Mus musculus GN=Eif3f PE=1 SV=2	195
-0.575	-0.32	0	0.27	-0.52	False		FALSE	FALSE	FALSE	-0.229	414936	407828	822764	0	17.406	28	2	10	2	2	0	89	1	11.2	0.688491	261.4	426.2	P08207	Protein S100-A10 OS=Mus musculus GN=S100a10 PE=1 SV=2	489
0.035	0.41	2.5	-0.13	0.22	False		FALSE	FALSE	FALSE	0.607	233742	322256	555998	0	17.107	17	1	8	1	1	0	97	1	9	0.442186	466.4	220.4	P29595	NEDD8 OS=Mus musculus GN=Nedd8 PE=1 SV=2	579
-0.305	0.25	-0.22	0.31	-0.29	False		FALSE	FALSE	FALSE	-0.051	554933	516809	1071740	0	17.064	12	4	9	1	4	0	123	1	51.1	0.972114	326.2	360.6	Q9WTM5	RuvB-like 2 OS=Mus musculus GN=Ruvbl2 PE=1 SV=3	836
-1.045	-0.35	-0.97	-0.17	-0.89	False		FALSE	FALSE	FALSE	-0.685	1355110	1344370	2699480	0	17.049	12	4	13	4	4	0	241	1	36.5	0.188445	170.2	515.8	P14152	Malate dehydrogenase, cytoplasmic OS=Mus musculus GN=Mdh1 PE=1 SV=3	355
0.415	0	1.51	-0.49	1.28	False		FALSE	FALSE	FALSE	0.543	172229	365941	538170	0	16.962	21	4	7	4	4	0	94	1	23.8	0.389421	481.4	205.8	Q62422	Osteoclast-stimulating factor 1 OS=Mus musculus GN=Ostf1 PE=1 SV=2	899
1.685	0.79	1.59	-0.88	1.01	False		FALSE	FALSE	FALSE	0.839	177124	408553	585678	0	16.893	3	3	5	3	3	0	90	1	106.8	0.160491	541.8	144.4	Q8BGQ7	Alanine--tRNA ligase, cytoplasmic OS=Mus musculus GN=Aars PE=1 SV=1	313
0.125	-0.07	0.47	-0.96	-0.15	False		FALSE	FALSE	FALSE	-0.117	1000460	1437290	2437750	0	16.779	42	3	15	3	3	0	129	1	11	0.972114	325.2	361.4	Q62426	Cystatin-B OS=Mus musculus GN=Cstb PE=1 SV=1	420
0.385	0.43	0.07	0.88	-0.35	False		FALSE	FALSE	FALSE	0.283	950465	1469380	2419850	0	16.767	29	4	14	0	4	0	162	1	14.9	0.53446	443	243.8	A0A087WNT1	Elongin-C OS=Mus musculus GN=Eloc PE=1 SV=1	726
0.295	0.09	0.23	0.41	0.34	False		FALSE	FALSE	FALSE	0.273	319390	236797	556186	0	16.766	12	4	6	0	4	0	105	1	44.7	0.487011	457	231	Q9CY58	Plasminogen activator inhibitor 1 RNA-binding protein OS=Mus musculus GN=Serbp1 PE=1 SV=2	822
-0.905	-0.47	-0.48	3.27	-0.62	False		FALSE	FALSE	FALSE	0.159	207971	168319	376290	0	16.733	25	3	7	0	3	0	117	1	17.2	0.736296	268.6	417.8	P62301	40S ribosomal protein S13 OS=Mus musculus GN=Rps13 PE=1 SV=2	223
-2.675	0.66	1.58	-0.88	-0.3	False		FALSE	FALSE	FALSE	-0.323	772331	320197	1092530	0	16.637	33	3	10	0	3	0	51	1	15.2	0.967458	328.8	358.4	Q4VWZ5	Acyl-CoA-binding protein OS=Mus musculus GN=Dbi PE=1 SV=1	851
-0.475	-0.06	-0.55	-0.02	0.04	False		FALSE	FALSE	FALSE	-0.213	1272260	2003530	3275790	0	16.629	13	4	18	0	4	0	329	1	32.5	0.790634	279.2	407.8	Q61937	Nucleophosmin OS=Mus musculus GN=Npm1 PE=1 SV=1	27
-0.095	0.38	0.31	0.56	-0.01	False		FALSE	FALSE	FALSE	0.229	268103	326661	594764	0	16.603	20	3	4	0	3	0	100	1	23.2	0.671858	409.8	276.8	B1AQF4	Dual-specificity protein phosphatase 3 OS=Mus musculus GN=Dusp3 PE=1 SV=1	407
0.205	0.15	0	0.76	1.06	False		FALSE	FALSE	FALSE	0.435	246095	384875	630970	0	16.555	11	5	5	4	5	0	101	1	57.1	0.389421	478.4	208.8	Q922B2	Aspartate--tRNA ligase, cytoplasmic OS=Mus musculus GN=Dars PE=1 SV=2	24
-0.805	-1.31	-0.83	0.38	-1.28	False		FALSE	FALSE	FALSE	-0.769	1448090	864463	2312550	0	16.548	10	2	12	2	2	0	201	1	22.6	0.202683	175	512	P43276	Histone H1.5 OS=Mus musculus GN=Hist1h1b PE=1 SV=2	449
-0.425	-0.42	-1.19	-0.04	-0.22	False		FALSE	FALSE	FALSE	-0.459	620657	390331	1010990	0	16.527	3	4	5	1	4	0	133	1	183.1	0.390532	216	471.2	P13864	DNA (cytosine-5)-methyltransferase 1 OS=Mus musculus GN=Dnmt1 PE=1 SV=5	713
0.525	0.3	0.97	-3.19	0.38	False		FALSE	FALSE	FALSE	-0.203	661283	976658	1637940	0	16.219	8	2	11	0	2	0	294	1	15	0.530861	445	242.8	A0A087WQN2	Prothymosin alpha (Fragment) OS=Mus musculus GN=Ptma PE=1 SV=1	671
-0.955	-0.84	-0.35	1.37	-1.59	False		FALSE	FALSE	FALSE	-0.473	73023.9	68172.8	141197	0	16.213	14	3	14	1	1	0	549	1	21.8	0.490979	232.4	454.4	P43275	Histone H1.1 OS=Mus musculus GN=Hist1h1a PE=1 SV=2	304
-0.355	0.63	-0.52	0.36	-0.98	False		FALSE	FALSE	FALSE	-0.173	1009110	1018050	2027160	0	16.16	18	4	9	3	4	0	99	1	28.8	0.972588	307.2	380.4	P57759	Endoplasmic reticulum resident protein 29 OS=Mus musculus GN=Erp29 PE=1 SV=2	412
0.625	-0.35	1.03	0.7	1.06	False		FALSE	FALSE	FALSE	0.613	121815	206293	328108	0	16.137	17	3	6	0	3	0	88	1	33.3	0.302402	506.8	179.4	Q9CPV4	Glyoxalase domain-containing protein 4 OS=Mus musculus GN=Glod4 PE=1 SV=1	431
-0.415	-1.1	-0.66	-0.08	-0.72	False		FALSE	FALSE	FALSE	-0.595	771297	540107	1311400	0	16.122	18	4	11	1	4	0	252	1	31.4	0.239364	186.8	501	P14148	60S ribosomal protein L7 OS=Mus musculus GN=Rpl7 PE=1 SV=2	79
-0.145	-0.45	0.89	-0.98	0.24	False		FALSE	FALSE	FALSE	-0.089	334692	380629	715322	0	16.033	10	3	8	3	3	0	157	1	50	0.972114	327.8	359.4	P46664	Adenylosuccinate synthetase isozyme 2 OS=Mus musculus GN=Adss PE=1 SV=2	240
0.235	0.98	-0.36	1.96	0.46	False		FALSE	FALSE	FALSE	0.655	282888	710031	992919	0	15.93	2	4	5	0	4	0	115	1	310.7	0.249692	517.4	169.6	Q3TLH4	Protein PRRC2C OS=Mus musculus GN=Prrc2c PE=1 SV=3	689
0.335	0.23	1.39	-0.58	0.67	False		FALSE	FALSE	FALSE	0.409	1985880	2985060	4970930	0	15.727	18	3	31	0	3	0	197	1	11.7	0.384694	485.8	201.4	P07091	Protein S100-A4 OS=Mus musculus GN=S100a4 PE=1 SV=1	137
-0.935	-2.68	-2.35	-1.15	-1.84	False		TRUE	TRUE	FALSE	-1.791	1608820	815628	2424450	0	15.701	32	4	14	0	4	0	87	1	14.3	0.00826788	77.2	609.6	G3UW85	Enhancer of rudimentary homolog OS=Mus musculus GN=Erh PE=1 SV=1	454
-0.425	-1.01	-0.67	0.8	-0.44	False		FALSE	FALSE	FALSE	-0.349	1408310	1014650	2422970	0	15.5	9	3	18	0	3	0	223	1	33.6	0.541731	241	445.2	E9PUX4	60S ribosomal protein L6 OS=Mus musculus GN=Rpl6l PE=3 SV=1	149
-1.095	-1.15	-2.48	-0.68	-0.8	False		TRUE	TRUE	FALSE	-1.241	849163	404096	1253260	0	15.44	15	3	11	3	3	0	174	1	28.3	0.0397211	114	572.6	P57784	U2 small nuclear ribonucleoprotein A' OS=Mus musculus GN=Snrpa1 PE=1 SV=2	83
-0.165	2.01	3.17	2.53	0.54	False		FALSE	FALSE	FALSE	1.617	138311	721257	859569	0	15.354	5	3	7	0	3	0	52	1	84	0.0637029	578.2	108.8	B1AU75	Nuclear autoantigenic sperm protein OS=Mus musculus GN=Nasp PE=1 SV=1	402
0.835	0.17	0.07	0.8	-0.1	False		FALSE	FALSE	FALSE	0.355	386371	652258	1038630	0	15.339	13	1	15	0	1	0	89	1	11.4	0.487011	454	232.8	F6W687	Non-histone chromosomal protein HMG-17 (Fragment) OS=Mus musculus GN=Hmgn2 PE=1 SV=1	685
-0.415	0	-0.26	-0.08	0.00999999	False		FALSE	FALSE	FALSE	-0.149	483881	442029	925910	0	15.233	11	3	7	0	2	1	64	1	48.5	0.89283	295.4	393.2	E9PW66	Nucleosome assembly protein 1-like 1 OS=Mus musculus GN=Nap1l1 PE=1 SV=1	490
3.105	0.85	3.57	0.55	3.56	False		TRUE	FALSE	TRUE	2.327	16170.3	119754	135924	0	15.2	13	3	9	1	1	0	197	1	39.4	0.00757158	626.2	61.8	P05063	Fructose-bisphosphate aldolase C OS=Mus musculus GN=Aldoc PE=1 SV=4	763
0.375	0.31	0.55	0.19	0.36	False		FALSE	FALSE	FALSE	0.357	780577	1342390	2122960	0	15.2	25	4	10	1	4	0	186	1	20.5	0.380711	489.6	197.6	Q9JM76	Actin-related protein 2/3 complex subunit 3 OS=Mus musculus GN=Arpc3 PE=1 SV=3	99
0.365	0.47	0.77	-1.51	0.47	False		FALSE	FALSE	FALSE	0.113	250430	418385	668816	0	15.184	14	3	5	2	3	0	71	1	36.6	0.487011	456	231.8	Q9JII6	Alcohol dehydrogenase [NADP(+)] OS=Mus musculus GN=Akr1a1 PE=1 SV=3	34
-0.905	-0.72	-1.09	0.47	-0.92	False		FALSE	FALSE	FALSE	-0.633	842155	539488	1381640	0	15.18	18	5	9	5	5	0	94	1	34.4	0.241367	187.8	499.2	Q9Z204	Heterogeneous nuclear ribonucleoproteins C1/C2 OS=Mus musculus GN=Hnrnpc PE=1 SV=1	353
-0.825	-1.58	0.34	-0.57	-0.2	False		FALSE	FALSE	FALSE	-0.567	226369	93180.8	319550	0	15.032	14	5	5	4	4	1	74	1	51.8	0.430783	223.4	463.2	P97855	Ras GTPase-activating protein-binding protein 1 OS=Mus musculus GN=G3bp1 PE=1 SV=1	356
-0.205	-0.67	2.2	2.37	1.23	False		FALSE	FALSE	FALSE	0.985	63474.4	100245	163719	0	14.943	48	4	11	3	3	0	87	1	12.7	0.411458	472.6	214.2	F6ZAX1	Polyadenylate-binding protein 1 (Fragment) OS=Mus musculus GN=Pabpc1 PE=1 SV=1	679
0.295	0.39	1.52	-0.91	0.13	False		FALSE	FALSE	FALSE	0.285	354319	494976	849295	0	14.932	13	3	7	0	3	0	77	1	29.6	0.524152	447.6	240.4	P97822	Acidic leucine-rich nuclear phosphoprotein 32 family member E OS=Mus musculus GN=Anp32e PE=1 SV=2	282
-0.315	-0.98	0.62	-0.82	-0.37	False		FALSE	FALSE	FALSE	-0.373	517129	295231	812361	0	14.789	9	3	5	0	3	0	80	1	42.1	0.568917	244.2	442.6	E9PY39	Uncharacterized protein OS=Mus musculus GN=Gm20431 PE=3 SV=1	163
-1.245	-1.57	0.13	0.31	-1.57	False		FALSE	FALSE	FALSE	-0.789	164274	222906	387179	0	14.74	4	3	4	0	3	0	112	1	122	0.303206	201.6	486	Q9JL26	Formin-like protein 1 OS=Mus musculus GN=Fmnl1 PE=1 SV=1	769
-1.405	-1.17	-0.33	0.41	-1.12	False		FALSE	FALSE	FALSE	-0.723	262730	311435	574165	0	14.607	14	4	6	1	4	0	102	1	33.9	0.258863	192.2	495.4	P10711	Transcription elongation factor A protein 1 OS=Mus musculus GN=Tcea1 PE=1 SV=2	819
0.845	-0.19	-0.17	0.33	-0.83	False		FALSE	FALSE	FALSE	-0.00299999	611047	640318	1251360	0	14.516	10	2	8	0	2	0	266	1	30.4	0.920433	344.8	342.8	E0CYV0	Protein-L-isoaspartate O-methyltransferase OS=Mus musculus GN=Pcmt1 PE=1 SV=1	334
-1.695	-0.15	2.25	-3.71	-2.74	False		FALSE	FALSE	FALSE	-1.209	329808	127782	457590	0	14.483	15	3	5	0	3	0	50	1	29.5	0.329595	205.8	480.8	Q9R1P4	Proteasome subunit alpha type-1 OS=Mus musculus GN=Psma1 PE=1 SV=1	888
0.575	-0.06	-0.07	0.07	-0.06	False		FALSE	FALSE	FALSE	0.091	367075	502464	869540	0	14.367	14	4	5	1	4	0	79	1	37.5	0.778961	383.6	302.6	P62137	Serine/threonine-protein phosphatase PP1-alpha catalytic subunit OS=Mus musculus GN=Ppp1ca PE=1 SV=1	373
0.055	-0.63	-0.54	0.64	-0.49	False		FALSE	FALSE	FALSE	-0.193	1286890	1144520	2431410	0	14.285	12	3	15	0	3	0	192	1	22.6	0.790634	278.8	409	Q6ZWN5	40S ribosomal protein S9 OS=Mus musculus GN=Rps9 PE=1 SV=3	663
0.735	0.83	0.68	-0.92	0.22	False		FALSE	FALSE	FALSE	0.309	308220	643884	952104	0	14.254	32	3	7	2	3	0	116	1	16.7	0.39169	476.8	209.8	P08905	Lysozyme C-2 OS=Mus musculus GN=Lyz2 PE=1 SV=2	377
0.305	0.43	0.14	0.91	0	False		FALSE	FALSE	FALSE	0.357	454703	591408	1046110	0	14.23	15	3	8	0	3	0	91	1	26.2	0.438026	467.8	219.6	Q9CQF3	Cleavage and polyadenylation specificity factor subunit 5 OS=Mus musculus GN=Nudt21 PE=1 SV=1	630
-0.145	0.25	0.13	-0.1	0.44	False		FALSE	FALSE	FALSE	0.115	123267	135051	258318	0	14.094	5	2	4	0	1	0	121	1	43.9	0.690159	404.2	283.4	B7ZNL2	Nap1l4 protein OS=Mus musculus GN=Nap1l4 PE=1 SV=1	351
0.175	-0.07	-0.1	1.95	1.05	False		FALSE	FALSE	FALSE	0.601	226269	407164	633433	0	14.087	23	4	6	0	4	0	46	1	35.1	0.431637	469.6	218.2	Q3UZG4	Aminoacyl tRNA synthase complex-interacting multifunctional protein 1 OS=Mus musculus GN=Aimp1 PE=1 SV=1	737
-0.145	0.05	1.71	-2.66	0.36	False		FALSE	FALSE	FALSE	-0.137	493551	622041	1115590	0	13.994	10	2	10	2	2	0	97	1	11.1	0.830146	374	314.8	P50543	Protein S100-A11 OS=Mus musculus GN=S100a11 PE=1 SV=1	237
-1.055	-0.17	-2.19	-0.09	-1.28	False		FALSE	FALSE	FALSE	-0.957	470086	778415	1248500	0	13.986	19	2	6	1	2	0	170	1	14.2	0.165948	163.4	524.2	Q9D0T1	NHP2-like protein 1 OS=Mus musculus GN=Snu13 PE=1 SV=4	447
-0.595	0.23	-0.07	0.29	-0.1	False		FALSE	FALSE	FALSE	-0.049	333684	417259	750943	0	13.95	20	4	7	0	4	0	44	1	28.7	0.96342	331.4	356.8	P97371	Proteasome activator complex subunit 1 OS=Mus musculus GN=Psme1 PE=1 SV=2	180
-0.145	1.88	-0.71	0.7	-0.58	False		FALSE	FALSE	FALSE	0.229	203301	254239	457541	0	13.936	12	4	6	0	4	0	98	1	46.1	0.873401	356.6	330.8	Q8BG81	Polymerase delta-interacting protein 3 OS=Mus musculus GN=Poldip3 PE=1 SV=1	4
0.315	0.28	0.84	0.12	0.09	False		FALSE	FALSE	FALSE	0.329	1079090	1369170	2448260	0	13.914	25	2	12	2	2	0	150	1	12.9	0.487011	458	230	P62774	Myotrophin OS=Mus musculus GN=Mtpn PE=1 SV=2	217
0.125	-0.29	-0.48	0.71	-0.45	False		FALSE	FALSE	FALSE	-0.077	1563740	1676030	3239770	0	13.908	21	3	10	2	3	0	214	1	15.8	0.995794	313.8	374.4	P61358	60S ribosomal protein L27 OS=Mus musculus GN=Rpl27 PE=1 SV=2	538
0.675	0.05	-0.54	0.76	0.03	False		FALSE	FALSE	FALSE	0.195	687882	962737	1650620	0	13.896	9	3	17	0	3	0	149	1	21.9	0.657688	418.6	270.6	P51410	60S ribosomal protein L9 OS=Mus musculus GN=Rpl9 PE=2 SV=2	869
-0.095	0.03	-0.01	0.02	-0.06	False		FALSE	FALSE	FALSE	-0.023	118993	137522	256515	0	13.89	9	2	11	1	1	0	284	1	32.9	0.950642	334.8	351.8	P47754	F-actin-capping protein subunit alpha-2 OS=Mus musculus GN=Capza2 PE=1 SV=3	746
0.465	0.12	0.73	0.15	0.19	False		FALSE	FALSE	FALSE	0.331	213005	303293	516299	0	13.877	13	3	8	0	3	0	176	1	35.6	0.450148	464.6	221.6	P62715	Serine/threonine-protein phosphatase 2A catalytic subunit beta isoform OS=Mus musculus GN=Ppp2cb PE=1 SV=1	110
-0.095	-0.67	-1.56	-0.85	-0.85	False		FALSE	FALSE	FALSE	-0.805	925803	620065	1545870	0	13.784	27	4	9	0	4	0	102	1	20.4	0.176343	166.4	521.6	Q3TMX5	Arginine-rich, mutated in early stage tumors, isoform CRA_b OS=Mus musculus GN=Manf PE=1 SV=1	634
0.585	0.62	2.3	-1.25	0.76	False		FALSE	FALSE	FALSE	0.603	348041	655903	1003940	0	13.486	16	3	9	0	3	0	35	1	38.6	0.224426	524.2	163.4	F6WR04	Cathepsin S OS=Mus musculus GN=Ctss PE=1 SV=1	672
-1.715	0.9	0.36	0.85	0.05	False		FALSE	FALSE	FALSE	0.089	74529.5	165481	240011	0	13.427	25	3	5	1	3	0	75	1	18.8	0.686723	406	281.6	A0A0N4SVS6	Cellular nucleic acid-binding protein OS=Mus musculus GN=Cnbp PE=1 SV=1	422
-0.425	1.29	0.04	2.56	2.47	False		FALSE	FALSE	FALSE	1.187	239194	443973	683167	0	13.311	16	4	7	4	4	0	73	1	43.5	0.307417	506.4	181	Q99N69	Leupaxin OS=Mus musculus GN=Lpxn PE=1 SV=2	910
0.205	1.25	1.57	-1.34	0.43	False		FALSE	FALSE	FALSE	0.423	280930	546996	827926	0	13.187	10	4	7	0	4	0	59	1	55.7	0.384694	484.4	202.8	G3X8T3	Carboxypeptidase OS=Mus musculus GN=Ctsa PE=1 SV=1	242
-1.965	-1.09	-0.07	1.62	0.13	False		FALSE	FALSE	FALSE	-0.275	131564	256447	388011	0	13.18	3	3	4	3	3	0	70	1	134.1	0.944124	304	383	Q8BMJ2	Leucine--tRNA ligase, cytoplasmic OS=Mus musculus GN=Lars PE=1 SV=2	498
5.005	4.92	4.7	5.14	6.54	False		TRUE	FALSE	TRUE	5.261	157624	25892500	26050100	0	13.175	15	2	11	2	2	0	106	1	27.3	1.24e-09	685.4	1.6	Q9WUK2	Eukaryotic translation initiation factor 4H OS=Mus musculus GN=Eif4h PE=1 SV=3	821
-1.805	-1.93	-3.19	-1.25	-1.53	False		TRUE	TRUE	FALSE	-1.941	561712	198416	760128	0	13.133	13	2	8	1	2	0	199	1	17.8	0.00460375	63.8	623.4	Q8BP67	60S ribosomal protein L24 OS=Mus musculus GN=Rpl24 PE=1 SV=2	633
1.395	1.67	1.81	-1.07	0.49	False		FALSE	FALSE	FALSE	0.859	510861	809788	1320650	0	13.028	19	4	6	1	4	0	112	1	23.6	0.163712	540.6	145.6	P34022	Ran-specific GTPase-activating protein OS=Mus musculus GN=Ranbp1 PE=1 SV=2	591
-0.105	-0.42	-0.41	-1.91	-0.7	False		FALSE	FALSE	FALSE	-0.709	753788	513432	1267220	0	13.011	13	3	6	3	3	0	80	1	29.1	0.239364	186.6	500.8	P99026	Proteasome subunit beta type-4 OS=Mus musculus GN=Psmb4 PE=1 SV=1	718
-2.445	-4.11	-3.67	-3.18	-3.5	False		TRUE	TRUE	FALSE	-3.381	992011	101518	1093530	0	12.819	5	4	9	0	4	0	136	1	107.6	3.2e-05	20.4	666.4	G5E8I8	Calcium homeostasis endoplasmic reticulum protein OS=Mus musculus GN=Cherp PE=1 SV=2	135
-0.935	0.92	-0.1	-1.22	-0.71	False		FALSE	FALSE	FALSE	-0.409	157148	164447	321595	0	12.813	11	2	5	2	2	0	168	1	25.9	0.714598	265	422.4	P49722	Proteasome subunit alpha type-2 OS=Mus musculus GN=Psma2 PE=1 SV=3	9
-0.005	0.52	1.59	0.15	0.03	False		FALSE	FALSE	FALSE	0.457	120037	393516	513552	0	12.599	12	3	4	0	3	0	58	1	30.4	0.494938	451.4	236.4	O55023	Inositol monophosphatase 1 OS=Mus musculus GN=Impa1 PE=1 SV=1	386
0.155	-0.82	-0.46	0.89	-0.57	False		FALSE	FALSE	FALSE	-0.161	926560	810740	1737300	0	12.581	13	2	10	0	2	0	127	1	21.4	0.922693	300.4	386.4	Q6ZWZ7	60S ribosomal protein L17 OS=Mus musculus GN=Rpl17 PE=1 SV=1	310
-0.325	-1.73	-3.52	-1.43	-1.79	False		TRUE	TRUE	FALSE	-1.759	387297	139019	526315	0	12.304	8	3	8	3	3	0	86	1	51.9	0.0163067	91	595.4	C0HKD9	Microfibrillar-associated protein 1B OS=Mus musculus GN=Mfap1b PE=1 SV=1	483
-0.125	0.37	0.62	-1.3	-0.06	False		FALSE	FALSE	FALSE	-0.099	372304	506175	878479	0	12.237	16	3	6	0	3	0	86	1	21.2	0.910128	347.8	339.6	Q8VCG1	Deoxyuridine triphosphatase OS=Mus musculus GN=Dut PE=1 SV=1	76
-4.295	-5.95	-3.26	-4.11	-2.87	False		TRUE	TRUE	FALSE	-4.097	265538	23936.1	289474	0	12.199	15	2	20	0	1	0	294	1	13.5	9.28e-06	14.8	672	P0C0S6	Histone H2A.Z OS=Mus musculus GN=H2afz PE=1 SV=2	131
-0.325	-0.31	-0.7	1	0.22	False		FALSE	FALSE	FALSE	-0.023	317868	328285	646153	0	12.198	8	4	5	0	4	0	34	1	66.9	0.963235	331.2	356.2	G5E924	Heterogeneous nuclear ribonucleoprotein L (Fragment) OS=Mus musculus GN=Hnrnpl PE=1 SV=1	834
1.745	-1.95	1.07	4.55	1.06	False		FALSE	FALSE	FALSE	1.295	241994	370774	612768	0	12.147	15	2	9	2	2	0	146	1	15.8	0.239351	520.4	166.6	P62267	40S ribosomal protein S23 OS=Mus musculus GN=Rps23 PE=1 SV=3	519
-0.165	0.19	-0.28	-0.07	0.31	False		FALSE	FALSE	FALSE	-0.003	206790	250538	457328	0	12.146	6	3	4	3	3	0	64	1	75.6	0.847371	367.2	321.2	Q9D0I9	Arginine--tRNA ligase, cytoplasmic OS=Mus musculus GN=Rars PE=1 SV=2	581
-0.055	-0.03	0.8	-0.04	0.22	False		FALSE	FALSE	FALSE	0.179	182163	220638	402801	0	12.133	7	3	4	1	3	0	51	1	49	0.750885	391.8	297.4	Q9Z1N5	Spliceosome RNA helicase Ddx39b OS=Mus musculus GN=Ddx39b PE=1 SV=1	15
0.715	0.12	0.29	1.02	1.53	False		FALSE	FALSE	FALSE	0.735	127702	199548	327250	0	12.104	2	4	4	2	4	0	92	1	269.7	0.170576	537	149.8	P26039	Talin-1 OS=Mus musculus GN=Tln1 PE=1 SV=2	878
-0.635	-1.2	-0.15	-0.24	-1.96	False		FALSE	FALSE	FALSE	-0.837	144749	100518	245267	0	12.038	6	2	3	2	2	0	51	1	56.1	0.196839	173.6	513	Q8BG07	Phospholipase D4 OS=Mus musculus GN=Pld4 PE=1 SV=1	637
-0.875	1.91	-2.77	0.88	1.64	False		FALSE	FALSE	FALSE	0.157	172467	216137	388604	0	12.011	11	2	3	0	2	0	59	1	25.1	0.675449	408.8	278.6	Q9DBZ5	Eukaryotic translation initiation factor 3 subunit K OS=Mus musculus GN=Eif3k PE=1 SV=1	654
-1.145	0.37	0.34	-0.71	0.43	False		FALSE	FALSE	FALSE	-0.143	317317	595228	912545	0	12.002	8	2	8	0	2	0	181	1	20.8	0.848529	364	324.4	P23198	Chromobox protein homolog 3 OS=Mus musculus GN=Cbx3 PE=1 SV=2	474
0.225	-0.19	1.91	-1.45	0.08	False		FALSE	FALSE	FALSE	0.115	596280	1800720	2397000	0	11.938	21	4	6	4	4	0	24	1	26.4	0.830146	372.8	314.6	O09061	Proteasome subunit beta type-1 OS=Mus musculus GN=Psmb1 PE=1 SV=1	529
0.135	0.35	1.18	-0.56	-0.14	False		FALSE	FALSE	FALSE	0.193	502516	850142	1352660	0	11.925	23	3	7	0	3	0	66	1	18.7	0.686723	405.2	282.6	Q9R0Q7	Prostaglandin E synthase 3 OS=Mus musculus GN=Ptges3 PE=1 SV=1	928
0.225	-0.03	-0.09	-0.11	0	False		FALSE	FALSE	FALSE	-0.001	128613	134881	263494	0	11.871	15	1	4	1	1	0	121	1	10.5	0.896258	351.4	336.2	P62075	Mitochondrial import inner membrane translocase subunit Tim13 OS=Mus musculus GN=Timm13 PE=1 SV=1	170
-1.795	0.08	0.58	-3.21	-1.04	False		FALSE	FALSE	FALSE	-1.077	179309	109001	288309	0	11.846	8	3	3	3	3	0	59	1	64.5	0.329088	205.4	481.6	Q07797	Galectin-3-binding protein OS=Mus musculus GN=Lgals3bp PE=1 SV=1	376
0.205	-0.22	0.09	-0.17	0.21	False		FALSE	FALSE	FALSE	0.023	138112	126129	264242	0	11.711	3	1	3	1	1	0	123	1	56.9	0.847371	367	322	O70310	Glycylpeptide N-tetradecanoyltransferase 1 OS=Mus musculus GN=Nmt1 PE=1 SV=1	615
-0.085	0.38	0	1.06	-0.05	False		FALSE	FALSE	FALSE	0.261	274101	551169	825269	0	11.628	17	3	5	1	3	0	45	1	26.5	0.657688	417	271	Q9WTP6	Adenylate kinase 2, mitochondrial OS=Mus musculus GN=Ak2 PE=1 SV=5	864
-2.805	-2.04	-1.3	0.99	-0.26	False		FALSE	FALSE	FALSE	-1.083	593374	381222	974596	0	11.595	12	2	6	0	2	0	67	1	17.6	0.286037	197.2	489	P47915	60S ribosomal protein L29 OS=Mus musculus GN=Rpl29 PE=2 SV=2	265
0.015	-1	-0.7	0.77	-0.94	False		FALSE	FALSE	FALSE	-0.371	1313330	1166760	2480090	0	11.386	7	2	12	2	2	0	212	1	28	0.623744	253.4	434.2	P62918	60S ribosomal protein L8 OS=Mus musculus GN=Rpl8 PE=1 SV=2	229
-0.785	-1.87	-1.95	-2.08	-1.41	False		TRUE	TRUE	FALSE	-1.619	474406	286026	760432	0	11.386	7	3	10	1	3	0	126	1	50.5	0.00826788	76.6	610.4	Q8K2F8	Protein LSM14 homolog A OS=Mus musculus GN=Lsm14a PE=1 SV=1	599
0.015	-0.52	0.69	-1.91	-0.15	False		FALSE	FALSE	FALSE	-0.375	295586	392993	688579	0	11.385	18	3	5	3	3	0	83	1	22.9	0.743202	272.2	415.4	Q9R1P3	Proteasome subunit beta type-2 OS=Mus musculus GN=Psmb2 PE=1 SV=1	743
-0.255	0.88	-0.24	0.98	0.29	False		FALSE	FALSE	FALSE	0.331	218961	1081820	1300780	0	11.36	4	3	3	2	3	0	86	1	105.7	0.530861	445	242.4	Q3TXS7	26S proteasome non-ATPase regulatory subunit 1 OS=Mus musculus GN=Psmd1 PE=1 SV=1	732
-1.575	-0.57	-1.33	-0.39	-1.49	False		FALSE	FALSE	FALSE	-1.071	1692310	1325830	3018140	0	11.36	7	4	6	0	4	0	91	1	61.3	0.0688101	129.4	557.4	J3QPG5	Prosaposin OS=Mus musculus GN=Psap PE=1 SV=1	502
3.565	3.44	4.19	3.38	4.68	False		TRUE	FALSE	TRUE	3.851	493413	6521980	7015390	0	11.342	25	3	21	3	3	0	234	1	10	2.24e-07	681.8	5.2	P14069	Protein S100-A6 OS=Mus musculus GN=S100a6 PE=1 SV=3	707
-1.465	-1.78	-2.09	0.64	-2.74	False		FALSE	FALSE	FALSE	-1.487	293074	87339.1	380413	0	11.256	4	3	4	0	3	0	73	1	84.2	0.0963319	141.4	546.2	F8VQ95	Transforming acidic coiled-coil-containing protein 1 OS=Mus musculus GN=Tacc1 PE=1 SV=1	369
0.125	1.34	2.54	0.44	0.59	False		FALSE	FALSE	FALSE	1.007	98724.7	217296	316021	0	11.185	4	3	3	3	3	0	105	1	94.8	0.108769	560.8	127.2	Q9ER72	Cysteine--tRNA ligase, cytoplasmic OS=Mus musculus GN=Cars PE=1 SV=2	702
-0.325	-1.13	-0.83	0.97	-0.59	False		FALSE	FALSE	FALSE	-0.381	773688	613250	1386940	0	11.175	15	3	8	1	3	0	206	1	24.3	0.527603	237.8	449.4	P47963	60S ribosomal protein L13 OS=Mus musculus GN=Rpl13 PE=1 SV=3	705
-0.245	-1.66	-2.11	0.16	-0.49	False		FALSE	FALSE	FALSE	-0.869	299026	153495	452522	0	11.14	3	2	7	2	2	0	83	1	90.8	0.23397	184	503.6	Q9Z315	U4/U6.U5 tri-snRNP-associated protein 1 OS=Mus musculus GN=Sart1 PE=1 SV=1	51
-2.575	-0.86	2.16	1.26	-0.15	False		FALSE	FALSE	FALSE	-0.033	70047.3	54649.1	124696	0	11.007	6	1	2	0	1	0	100	1	28.4	0.935521	339.6	347.6	O88456	Calpain small subunit 1 OS=Mus musculus GN=Capns1 PE=1 SV=1	333
-2.445	1.49	-1.48	0.34	-0.76	False		FALSE	FALSE	FALSE	-0.571	126720	81102.1	207822	0	10.943	8	2	4	0	2	0	46	1	56	0.716748	266.2	421.2	Q9JMA1	Ubiquitin carboxyl-terminal hydrolase 14 OS=Mus musculus GN=Usp14 PE=1 SV=3	598
-0.585	-0.34	-0.98	-0.12	-0.64	False		FALSE	FALSE	FALSE	-0.533	979139	698121	1677260	0	10.94	6	4	8	4	4	0	146	1	97.1	0.257122	191.6	495.2	P70168	Importin subunit beta-1 OS=Mus musculus GN=Kpnb1 PE=1 SV=2	735
0.075	-0.72	-0.84	-3.2	-0.31	False		FALSE	FALSE	FALSE	-0.999	684932	663835	1348770	0	10.924	7	2	6	2	2	0	110	1	34	0.239364	186.6	501.4	Q9WUU7	Cathepsin Z OS=Mus musculus GN=Ctsz PE=1 SV=1	389
1.395	1.34	0.68	1.79	1.81	False		TRUE	FALSE	TRUE	1.403	72733	195169	267902	0	10.843	6	2	2	0	2	0	107	1	41.5	0.0097754	620.6	66.8	A0A1L1STE6	Isocitrate dehydrogenase [NAD] subunit, mitochondrial OS=Mus musculus GN=Idh3a PE=1 SV=1	330
-1.545	-2.66	-3.61	-3.36	-0.94	False		TRUE	TRUE	FALSE	-2.423	606587	117922	724509	0	10.796	9	3	9	1	3	0	202	1	54.2	0.0013862	48.6	638.6	Q2TPA8	Hydroxysteroid dehydrogenase-like protein 2 OS=Mus musculus GN=Hsdl2 PE=1 SV=1	397
0.485	-1.21	-0.39	0.47	0.25	False		FALSE	FALSE	FALSE	-0.079	79472.1	66977.1	146449	0	10.714	4	2	3	2	2	0	77	1	80.7	0.829592	373.2	313.6	Q9QUR6	Prolyl endopeptidase OS=Mus musculus GN=Prep PE=1 SV=1	765
0.295	-0.41	0.28	-0.01	0.49	False		FALSE	FALSE	FALSE	0.129	149402	176622	326024	0	10.709	6	2	5	0	2	0	97	1	42.7	0.671858	412.2	275.6	Q9JK81	UPF0160 protein MYG1, mitochondrial OS=Mus musculus GN=Myg1 PE=1 SV=1	912
-0.785	0.14	0.25	0	-0.37	False		FALSE	FALSE	FALSE	-0.153	129321	157190	286511	0	10.687	11	3	6	1	3	0	96	1	34.8	0.925633	301	387	Q9CS42	Ribose-phosphate pyrophosphokinase 2 OS=Mus musculus GN=Prps2 PE=1 SV=4	503
-0.515	-0.4	-1.45	-0.59	-0.25	False		FALSE	FALSE	FALSE	-0.641	232235	304034	536269	0	10.63	16	2	6	2	2	0	204	1	12.8	0.241367	187.6	499.8	P48428	Tubulin-specific chaperone A OS=Mus musculus GN=Tbca PE=1 SV=3	840
0.135	-0.08	0.41	-4.9	-0.17	False		FALSE	FALSE	FALSE	-0.921	465095	504713	969808	0	10.599	27	2	6	2	2	0	89	1	12.8	0.857391	289.6	398.6	Q9JJU8	SH3 domain-binding glutamic acid-rich-like protein OS=Mus musculus GN=Sh3bgrl PE=1 SV=1	267
-0.025	0.1	1.83	-2.48	-0.19	False		FALSE	FALSE	FALSE	-0.153	335971	385146	721117	0	10.507	15	3	7	3	3	0	69	1	32.2	0.950596	336	351	Q8CDN6	Thioredoxin-like protein 1 OS=Mus musculus GN=Txnl1 PE=1 SV=3	762
-1.965	-2.57	1.06	-4.18	-0.34	False		FALSE	FALSE	FALSE	-1.599	108573	43173.5	151747	0	10.504	21	2	4	0	2	0	39	1	17.9	0.196691	173	514.8	P68037	Ubiquitin-conjugating enzyme E2 L3 OS=Mus musculus GN=Ube2l3 PE=1 SV=1	871
-0.005	0.92	1.99	1.32	0.17	False		FALSE	FALSE	FALSE	0.879	134866	315002	449868	0	10.494	9	2	3	0	2	0	83	1	29.5	0.188807	533	154.6	Q66JS6	Eukaryotic translation initiation factor 3 subunit J-B OS=Mus musculus GN=Eif3j2 PE=1 SV=1	800
0.325	-0.25	0.37	-0.6	0.11	False		FALSE	FALSE	FALSE	-0.00900001	374961	469506	844467	0	10.478	13	3	4	3	3	0	41	1	38.4	0.847371	367.2	322.4	Q9Z1Z2	Serine-threonine kinase receptor-associated protein OS=Mus musculus GN=Strap PE=1 SV=2	77
0.365	-0.07	0.39	-0.27	0.16	False		FALSE	FALSE	FALSE	0.115	197882	266332	464214	0	10.415	7	3	5	3	3	0	73	1	65.3	0.724236	399.4	289.6	Q76MZ3	Serine/threonine-protein phosphatase 2A 65 kDa regulatory subunit A alpha isoform OS=Mus musculus GN=Ppp2r1a PE=1 SV=3	675
-1.405	-2.48	-2.59	0.62	-0.75	False		FALSE	FALSE	FALSE	-1.321	957460	532586	1490050	0	10.342	8	2	13	0	2	0	321	1	24.1	0.129712	153.4	534	E9QAZ2	Ribosomal protein L15 OS=Mus musculus GN=Gm10020 PE=3 SV=1	60
-0.605	-0.57	-1.31	-0.84	-0.08	False		FALSE	FALSE	FALSE	-0.681	113496	69749.6	183245	0	10.299	5	3	3	3	3	0	64	1	96	0.23397	184.2	503.2	Q9WU78	Programmed cell death 6-interacting protein OS=Mus musculus GN=Pdcd6ip PE=1 SV=3	517
0.375	-0.34	-0.04	-0.01	-0.42	False		FALSE	FALSE	FALSE	-0.087	1036330	995916	2032250	0	10.279	11	2	5	2	2	0	80	1	24.9	0.972114	325.6	362.6	Q9D8B3	Charged multivesicular body protein 4b OS=Mus musculus GN=Chmp4b PE=1 SV=2	128
0.165	-0.46	-0.12	-0.17	-0.2	False		FALSE	FALSE	FALSE	-0.157	815812	749877	1565690	0	10.273	15	3	8	0	3	0	80	1	25	0.919078	299.4	388.6	P63073	Eukaryotic translation initiation factor 4E OS=Mus musculus GN=Eif4e PE=1 SV=1	181
-2.985	-1.41	-2.03	0	-2.09	False		TRUE	TRUE	FALSE	-1.703	323225	85423.5	408649	0	10.213	6	3	4	0	3	0	76	1	41.7	0.0325998	108	579.6	A0A0A6YVV8	Muscleblind-like protein 1 OS=Mus musculus GN=Mbnl1 PE=1 SV=1	569
-2.295	0.25	-0.46	-0.7	-0.07	False		FALSE	FALSE	FALSE	-0.655	129634	135502	265135	0	10.167	22	3	4	0	3	0	32	1	29.7	0.618741	252.6	435.8	Q4VAA2	Protein CDV3 OS=Mus musculus GN=Cdv3 PE=1 SV=2	48
0.375	-0.18	-1.16	0.81	1.01	False		FALSE	FALSE	FALSE	0.171	155314	137648	292962	0	10.098	1	3	7	0	3	0	59	1	533.9	0.646563	420	268	Q9QXS1	Plectin OS=Mus musculus GN=Plec PE=1 SV=3	870
2.165	0.22	-0.45	-0.55	0.86	False		FALSE	FALSE	FALSE	0.449	69697.9	90280.7	159979	0	10.064	5	3	4	3	3	0	54	1	117.7	0.530861	444.8	243	Q02053	Ubiquitin-like modifier-activating enzyme 1 OS=Mus musculus GN=Uba1 PE=1 SV=1	830
0.625	0.26	0.56	0.62	0.65	False		FALSE	FALSE	FALSE	0.543	176898	302226	479124	0	10.033	5	2	4	2	2	0	112	1	50.1	0.186168	534.2	153.6	Q8K1I7	WAS/WASL-interacting protein family member 1 OS=Mus musculus GN=Wipf1 PE=1 SV=1	911
0.225	0.00999999	0.99	-1.12	-0.18	False		FALSE	FALSE	FALSE	-0.015	176794	221367	398161	0	10.032	7	3	4	3	3	0	64	1	54.3	0.869111	358.4	330	P97807	Fumarate hydratase, mitochondrial OS=Mus musculus GN=Fh PE=1 SV=3	341
0.165	0.13	-0.93	1.04	1.19	False		FALSE	FALSE	FALSE	0.319	98900.2	124299	223199	0	9.938	3	2	3	2	2	0	43	1	106.8	0.536148	442.8	244.8	Q8BHN3	Neutral alpha-glucosidase AB OS=Mus musculus GN=Ganab PE=1 SV=1	927
0.005	0.31	-0.22	0.36	0.41	False		FALSE	FALSE	FALSE	0.173	277347	400088	677435	0	9.901	11	3	5	0	3	0	78	1	34.1	0.61932	424.6	263	P11440	Cyclin-dependent kinase 1 OS=Mus musculus GN=Cdk1 PE=1 SV=3	259
0.215	-0.1	0.96	-1.23	0.00999999	False		FALSE	FALSE	FALSE	-0.029	306250	351764	658014	0	9.887	5	1	6	0	1	0	217	1	27.4	0.881188	355.2	333.2	Q9QUM9	Proteasome subunit alpha type-6 OS=Mus musculus GN=Psma6 PE=1 SV=1	450
-1.085	-0.79	-0.4	0.19	-0.79	False		FALSE	FALSE	FALSE	-0.575	128119	105272	233391	0	9.869	41	4	5	4	4	0	35	1	10.2	0.286493	197.6	490.8	Q8BGS2	BolA-like protein 2 OS=Mus musculus GN=Bola2 PE=1 SV=1	155
-0.435	-0.21	-0.11	3.09	-0.54	False		FALSE	FALSE	FALSE	0.359	621190	852917	1474110	0	9.855	27	3	6	1	3	0	85	1	14.9	0.995794	313.8	373.4	P62830	60S ribosomal protein L23 OS=Mus musculus GN=Rpl23 PE=1 SV=1	312
-0.905	0.17	0.19	-1.6	-0.14	False		FALSE	FALSE	FALSE	-0.457	105687	129780	235467	0	9.821	9	3	4	3	3	0	63	1	49.9	0.716748	265.6	423	Q07076	Annexin A7 OS=Mus musculus GN=Anxa7 PE=1 SV=2	119
-0.105	0.97	1.12	1.03	0.15	False		FALSE	FALSE	FALSE	0.633	170004	309645	479649	0	9.788	4	3	4	0	3	0	98	1	95.8	0.324583	501.6	186.4	P56399	Ubiquitin carboxyl-terminal hydrolase 5 OS=Mus musculus GN=Usp5 PE=1 SV=1	12
1.195	0.96	0.88	2.4	2.22	False		TRUE	FALSE	TRUE	1.531	122331	286160	408491	0	9.779	6	3	4	0	3	0	106	1	59.3	0.00657715	627.8	59.2	Q922I7	MCG13402, isoform CRA_c OS=Mus musculus GN=Ptbp1 PE=1 SV=1	607
0.635	0	0.5	0.68	-0.76	False		FALSE	FALSE	FALSE	0.211	449452	9473170	9922620	0	9.778	38	3	9	0	3	0	71	1	16.1	0.671858	411	276.8	Q9D104	Putative uncharacterized protein OS=Mus musculus GN=Srp19 PE=1 SV=1	419
-0.025	2.24	2.23	2.36	0.22	False		FALSE	FALSE	FALSE	1.405	180423	375782	556205	0	9.775	6	2	3	2	2	0	90	1	40.9	0.115303	559	129.4	Q8C570	mRNA export factor OS=Mus musculus GN=Rae1 PE=1 SV=1	261
0.155	-0.1	-0.08	0	0.26	False		FALSE	FALSE	FALSE	0.047	203182	234877	438059	0	9.718	4	1	2	1	1	0	47	1	40.2	0.826731	377.2	313	Q8R409	Protein HEXIM1 OS=Mus musculus GN=Hexim1 PE=1 SV=1	277
-0.635	0.62	0.23	1.53	-0.11	False		FALSE	FALSE	FALSE	0.327	186981	496987	683968	0	9.653	18	3	6	3	3	0	87	1	21.7	0.671858	411.6	276.6	Q9DB15	39S ribosomal protein L12, mitochondrial OS=Mus musculus GN=Mrpl12 PE=1 SV=2	768
-0.295	-0.52	-0.61	-0.68	-0.12	False		FALSE	FALSE	FALSE	-0.445	650398	500933	1151330	0	9.632	10	3	9	0	3	0	100	1	26.5	0.414758	219.8	467.2	Q9CXW3	Calcyclin-binding protein OS=Mus musculus GN=Cacybp PE=1 SV=1	623
0.395	-0.34	-0.31	0.3	-0.34	False		FALSE	FALSE	FALSE	-0.059	570664	534268	1104930	0	9.617	12	1	10	0	1	0	73	1	10.8	0.953983	334.4	354	P62305	Small nuclear ribonucleoprotein E OS=Mus musculus GN=Snrpe PE=1 SV=1	239
0.625	0.89	2.46	-1.59	0.98	False		FALSE	FALSE	FALSE	0.673	109869	296245	406114	0	9.595	8	1	3	1	1	0	111	1	15	0.193741	529.6	157.6	Q62048	Astrocytic phosphoprotein PEA-15 OS=Mus musculus GN=Pea15 PE=1 SV=1	382
0.425	0.27	2.61	-1.42	0.46	False		FALSE	FALSE	FALSE	0.469	580912	962052	1542960	0	9.573	11	1	8	1	1	0	282	1	11.4	0.384694	485.2	202.2	Q9D0J8	Parathymosin OS=Mus musculus GN=Ptms PE=1 SV=3	853
-0.095	-0.08	0.21	1.22	0.25	False		FALSE	FALSE	FALSE	0.301	41003.6	67453	108457	0	9.562	8	3	5	0	1	0	23	1	42.4	0.663906	416.6	272.6	D3Z3G6	Mitogen-activated protein kinase OS=Mus musculus GN=Mapk3 PE=1 SV=1	384
0.315	2.18	0.45	1.65	0.5	False		FALSE	FALSE	FALSE	1.019	832165	737627	1569790	0	9.546	7	3	6	2	3	0	91	1	54.2	0.0692717	575	112.8	P49710	Hematopoietic lineage cell-specific protein OS=Mus musculus GN=Hcls1 PE=1 SV=2	30
-0.305	-1.09	-0.51	1.42	-0.58	False		FALSE	FALSE	FALSE	-0.213	355860	260406	616266	0	9.539	7	1	6	1	1	0	201	1	16.6	0.693671	262.8	425	P14115	60S ribosomal protein L27a OS=Mus musculus GN=Rpl27a PE=1 SV=5	295
-1.795	0.97	0.58	1.63	-0.21	False		FALSE	FALSE	FALSE	0.235	56323.3	77104.4	133428	0	9.537	3	1	3	1	1	0	63	1	79.8	0.675174	410.4	278	O08529	Calpain-2 catalytic subunit OS=Mus musculus GN=Capn2 PE=1 SV=4	738
0.395	0.45	4.55	2.83	0.95	False		TRUE	FALSE	TRUE	1.835	76798.1	281124	357922	0	9.528	3	2	4	2	2	0	79	1	100.1	0.0106627	618.6	68.8	Q8VDM4	26S proteasome non-ATPase regulatory subunit 2 OS=Mus musculus GN=Psmd2 PE=1 SV=1	747
-1.695	-1.14	-1.25	0.22	-1.17	False		FALSE	FALSE	FALSE	-1.007	210209	109512	319721	0	9.528	12	3	4	3	3	0	56	1	35.6	0.117479	149.6	538.6	Q9Z1D1	Eukaryotic translation initiation factor 3 subunit G OS=Mus musculus GN=Eif3g PE=1 SV=2	129
0.265	0.21	1.62	-1.37	0.46	False		FALSE	FALSE	FALSE	0.237	79949.6	95857.2	175807	0	9.527	7	1	2	1	1	0	31	1	26.2	0.487011	453.6	234.4	Q62348	Translin OS=Mus musculus GN=Tsn PE=1 SV=1	659
-1.815	-0.43	0.54	-0.07	-1.63	False		FALSE	FALSE	FALSE	-0.681	106094	97175.2	203269	0	9.526	3	2	2	2	2	0	85	1	102	0.388281	215.4	471.4	P97310	DNA replication licensing factor MCM2 OS=Mus musculus GN=Mcm2 PE=1 SV=3	291
0.245	-0.03	2.81	-1.54	-0.22	False		FALSE	FALSE	FALSE	0.253	369317	840167	1209480	0	9.477	7	3	3	2	3	0	92	1	51.7	0.847371	369	321	Q9CZU6	Citrate synthase, mitochondrial OS=Mus musculus GN=Cs PE=1 SV=1	874
-0.275	-1.71	-1.97	-0.89	-1.56	False		TRUE	TRUE	FALSE	-1.281	1155280	429296	1584570	0	9.41	14	1	5	1	1	0	117	1	13.6	0.047174	118.4	568.6	Q9CQA6	Coiled-coil-helix-coiled-coil-helix domain-containing protein 1 OS=Mus musculus GN=Chchd1 PE=1 SV=1	366
0.965	0.15	0.28	0.61	-0.07	False		FALSE	FALSE	FALSE	0.387	443677	693846	1137520	0	9.37	14	1	10	1	1	0	181	1	8.5	0.487011	456.8	231.6	Q9D115	Zinc finger protein 706 OS=Mus musculus GN=Znf706 PE=1 SV=1	192
0.405	1.83	-1.14	0.93	0.02	False		FALSE	FALSE	FALSE	0.409	171677	341108	512786	0	9.352	5	2	2	0	2	0	54	1	63.4	0.487011	453.6	233.6	H3BJW3	Cleavage and polyadenylation-specificity factor subunit 6 OS=Mus musculus GN=Cpsf6 PE=1 SV=1	924
0.945	0.69	0.68	1.09	0.41	False		FALSE	FALSE	FALSE	0.763	312192	589576	901769	0	9.289	35	2	6	0	2	0	32	1	12.7	0.0637029	579	108.6	P48024	Eukaryotic translation initiation factor 1 OS=Mus musculus GN=Eif1 PE=1 SV=2	213
0.435	1.78	-0.14	3.55	-0.26	False		FALSE	FALSE	FALSE	1.073	259979	356955	616934	0	9.182	9	2	6	2	2	0	110	1	28.4	0.356008	493.2	193.2	Q8BTW3	Exosome complex component MTR3 OS=Mus musculus GN=Exosc6 PE=1 SV=1	500
-0.105	-0.14	-0.09	0.92	-0.38	False		FALSE	FALSE	FALSE	0.041	117917	135312	253230	0	9.139	4	1	6	1	1	0	52	1	60.2	0.965446	329.6	357.8	Q3UEB3	Poly(U)-binding-splicing factor PUF60 OS=Mus musculus GN=Puf60 PE=1 SV=2	676
-0.005	0.42	0.86	0.43	0.51	False		FALSE	FALSE	FALSE	0.443	164255	183705	347960	0	9.136	3	3	3	3	3	0	42	1	144.2	0.384125	487.8	199.8	Q8BU30	Isoleucine--tRNA ligase, cytoplasmic OS=Mus musculus GN=Iars PE=1 SV=2	832
0.245	0.79	2.37	-1.09	0.24	False		FALSE	FALSE	FALSE	0.511	142884	202415	345299	0	9.135	14	3	3	0	3	0	41	1	25.7	0.391962	479.2	210.2	A0A0R4J093	UMP-CMP kinase OS=Mus musculus GN=Cmpk1 PE=1 SV=1	799
-1.225	-0.81	-0.74	-2	-1.2	False		TRUE	TRUE	FALSE	-1.195	202928	67250.8	270179	0	9.133	6	3	3	0	2	1	57	1	56.5	0.0317167	107	580.4	P47738	Aldehyde dehydrogenase, mitochondrial OS=Mus musculus GN=Aldh2 PE=1 SV=1	210
-0.195	-0.97	-0.87	-0.41	-0.52	False		FALSE	FALSE	FALSE	-0.593	1418570	1215280	2633850	0	9.132	7	1	8	0	1	0	39	1	15.3	0.251498	190.4	497.6	P02301	Histone H3.3C OS=Mus musculus GN=H3f3c PE=3 SV=3	145
0.155	0.94	0.00999999	0.99	-0.17	False		FALSE	FALSE	FALSE	0.385	142010	170486	312496	0	9.122	3	1	3	1	1	0	128	1	35.5	0.490398	452.2	235.6	Q9D1M0	Protein SEC13 homolog OS=Mus musculus GN=Sec13 PE=1 SV=3	189
0.265	0.34	1.62	-0.93	0.25	False		FALSE	FALSE	FALSE	0.309	535001	824805	1359810	0	9.053	11	1	6	0	1	0	89	1	13.8	0.487011	456.2	233	P70349	Histidine triad nucleotide-binding protein 1 OS=Mus musculus GN=Hint1 PE=1 SV=3	25
-2.885	-2.8	-2.18	-3.04	-1.72	False		TRUE	TRUE	FALSE	-2.525	222649	50003	272652	0	9.019	4	2	2	0	2	0	73	1	72.3	0.000504149	37.8	649.2	A0A0R4J0Z1	Protein disulfide-isomerase A4 OS=Mus musculus GN=Pdia4 PE=1 SV=1	238
0.835	0.4	0.8	1.49	0.14	False		FALSE	FALSE	FALSE	0.733	487008	1187010	1674020	0	8.982	18	2	7	0	2	0	61	1	12.2	0.160491	544.2	144	A0A140T8K6	60S ribosomal protein L36 OS=Mus musculus GN=Rpl36-ps3 PE=3 SV=1	622
-0.475	-1.14	-0.75	1.43	-0.66	False		FALSE	FALSE	FALSE	-0.319	445171	293734	738906	0	8.928	19	2	10	1	2	0	97	1	14.5	0.53831	239.2	448.8	Q6ZWV7	60S ribosomal protein L35 OS=Mus musculus GN=Rpl35 PE=1 SV=1	896
0.275	-0.67	-0.55	-1.5	-0.1	False		FALSE	FALSE	FALSE	-0.509	316938	274994	591932	0	8.87	5	2	4	1	2	0	70	1	47.4	0.61159	250.6	437.8	Q9Z2N8	Actin-like protein 6A OS=Mus musculus GN=Actl6a PE=1 SV=2	174
-1.125	-2.02	-0.29	-2.23	-2.14	False		TRUE	TRUE	FALSE	-1.561	342136	186646	528782	0	8.827	8	2	3	0	2	0	70	1	35.5	0.0244819	100.4	586.6	P28352	DNA-(apurinic or apyrimidinic site) lyase OS=Mus musculus GN=Apex1 PE=1 SV=2	643
0.085	-0.9	-0.81	1.46	1.66	False		FALSE	FALSE	FALSE	0.299	243872	235133	479005	0	8.799	25	2	5	0	2	0	27	1	14.2	0.750885	388.6	298.6	J3QP80	MCG15559 OS=Mus musculus GN=Gm5814 PE=4 SV=1	665
-0.235	0.73	-0.65	1.1	0.33	False		FALSE	FALSE	FALSE	0.255	434662	445414	880076	0	8.781	5	3	8	3	3	0	81	1	88.8	0.58568	432.4	255.8	Q62318	Transcription intermediary factor 1-beta OS=Mus musculus GN=Trim28 PE=1 SV=3	14
0.445	0.58	1.45	1.7	0.04	False		FALSE	FALSE	FALSE	0.843	67728.1	154321	222050	0	8.723	5	1	2	0	1	0	83	1	25	0.142917	550	137	E9Q2S9	Coiled-coil domain-containing protein 43 OS=Mus musculus GN=Ccdc43 PE=1 SV=1	357
-0.685	-0.04	-0.01	-1.75	-0.16	False		FALSE	FALSE	FALSE	-0.529	233500	210392	443892	0	8.711	10	2	5	2	2	0	31	1	30	0.494884	233.8	453.4	Q61166	Microtubule-associated protein RP/EB family member 1 OS=Mus musculus GN=Mapre1 PE=1 SV=3	316
1.235	1.73	3.07	2.9	1.66	False		TRUE	FALSE	TRUE	2.119	141333	333125	474458	0	8.664	21	3	3	0	3	0	52	1	18.4	9.21e-05	665.6	21.6	P62281	40S ribosomal protein S11 OS=Mus musculus GN=Rps11 PE=1 SV=3	374
0.405	0.38	1.67	1.77	0.53	False		TRUE	FALSE	TRUE	0.951	144519	247706	392226	0	8.648	4	2	3	2	2	0	60	1	64.2	0.0451846	588.6	99.2	Q61024	Asparagine synthetase [glutamine-hydrolyzing] OS=Mus musculus GN=Asns PE=1 SV=3	913
-2.865	-1.92	0.04	-0.74	-0.57	False		FALSE	FALSE	FALSE	-1.211	125576	46909.6	172485	0	8.617	8	2	4	0	2	0	43	1	32.5	0.143792	157.8	530	G3XA48	Isopentenyl-diphosphate Delta-isomerase 1 OS=Mus musculus GN=Idi1 PE=1 SV=1	719
-3.815	-5.37	-3.34	-2.75	-3.43	False		TRUE	TRUE	FALSE	-3.741	402524	35620	438144	0	8.591	10	3	6	3	3	0	90	1	49.1	1.91e-05	17.8	669.4	Q8CI61	BAG family molecular chaperone regulator 4 OS=Mus musculus GN=Bag4 PE=1 SV=2	572
-0.335	0.55	-1.4	1.26	0.07	False		FALSE	FALSE	FALSE	0.029	184452	228038	412491	0	8.56	5	1	5	1	1	0	118	1	21.2	0.830146	371.6	315.4	P60766	Cell division control protein 42 homolog OS=Mus musculus GN=Cdc42 PE=1 SV=2	445
-1.505	-1.34	-2.6	-1.26	-2.85	False		TRUE	TRUE	FALSE	-1.911	550489	279324	829813	0	8.551	2	2	7	0	2	0	126	1	108.1	0.00542181	68.2	618.6	Q569Z6	Thyroid hormone receptor-associated protein 3 OS=Mus musculus GN=Thrap3 PE=1 SV=1	52
0.055	0.82	0.24	1	0.00999999	False		FALSE	FALSE	FALSE	0.425	156547	190274	346821	0	8.518	7	2	5	0	2	0	66	1	38.1	0.476007	462	227.6	Q9QYJ3	DnaJ homolog subfamily B member 1 OS=Mus musculus GN=Dnajb1 PE=1 SV=3	527
-0.605	-0.22	-1.26	0.35	-0.54	False		FALSE	FALSE	FALSE	-0.455	192433	199963	392395	0	8.494	3	2	2	2	2	0	78	1	91.5	0.412433	219.2	469	P25206	DNA replication licensing factor MCM3 OS=Mus musculus GN=Mcm3 PE=1 SV=2	57
0.275	0.41	1.07	-1.87	0.31	False		FALSE	FALSE	FALSE	0.039	75423.8	116275	191699	0	8.483	12	1	3	0	1	0	33	1	16.8	0.564494	438.4	250.2	Q8BG13	Putative uncharacterized protein OS=Mus musculus GN=Rbm3 PE=1 SV=1	92
0.295	0.15	-0.16	0.58	-0.24	False		FALSE	FALSE	FALSE	0.125	206004	239171	445175	0	8.448	1	1	4	0	1	0	75	1	84.2	0.749488	393.4	296.2	B2RPU8	MCG130675 OS=Mus musculus GN=Zbed5 PE=2 SV=1	344
-1.005	-2.11	-1.76	-1.35	-1.22	False		TRUE	TRUE	FALSE	-1.489	507329	380878	888207	0	8.436	15	2	6	0	2	0	176	1	17	0.0142784	87.4	599.8	E0CX20	Protein BUD31 homolog OS=Mus musculus GN=Bud31 PE=1 SV=1	850
-2.005	-0.5	-1.37	1.76	-0.55	False		FALSE	FALSE	FALSE	-0.533	51848.6	44502.9	96351.5	0	8.373	23	2	3	0	2	0	98	1	10.9	0.423594	221.8	466	P61957	Small ubiquitin-related modifier 2 OS=Mus musculus GN=Sumo2 PE=1 SV=1	750
-0.245	0.24	0.89	-0.28	0.00999999	False		FALSE	FALSE	FALSE	0.123	354094	427518	781613	0	8.321	12	2	3	1	2	0	28	1	31	0.84141	372	317	Q8R5L1	Complement component 1 Q subcomponent-binding protein, mitochondrial OS=Mus musculus GN=C1qbp PE=1 SV=1	843
0.075	-0.39	-0.77	0.57	-0.44	False		FALSE	FALSE	FALSE	-0.191	1009580	930821	1940400	0	8.287	13	2	11	1	2	0	142	1	13.3	0.805833	282.4	405.8	Q9D1R9	60S ribosomal protein L34 OS=Mus musculus GN=Rpl34 PE=1 SV=2	68
0.065	-0.13	2.41	-1.14	0.18	False		FALSE	FALSE	FALSE	0.277	62395.3	85359.3	147755	0	8.281	8	2	2	1	2	0	70	1	30.2	0.786769	382.6	304.4	P28063	Proteasome subunit beta type-8 OS=Mus musculus GN=Psmb8 PE=1 SV=2	467
-0.135	-0.52	-1.75	-0.64	-0.29	False		FALSE	FALSE	FALSE	-0.667	280457	197930	478387	0	8.279	8	2	3	1	2	0	35	1	44.6	0.286962	198	490.6	Q61081	Hsp90 co-chaperone Cdc37 OS=Mus musculus GN=Cdc37 PE=1 SV=1	495
-0.285	-0.57	-0.25	1.48	-0.5	False		FALSE	FALSE	FALSE	-0.025	597952	515979	1113930	0	8.271	6	2	5	0	2	0	105	1	32.1	0.870282	291.4	396.2	D3YWJ3	40S ribosomal protein S2 OS=Mus musculus GN=Rps2 PE=1 SV=1	647
-1.015	-1.25	0.28	-2.78	-2.71	False		FALSE	FALSE	FALSE	-1.495	77113.1	31285.3	108398	0	8.261	2	1	2	1	1	0	82	1	67	0.08112	135	553	Q9JMH6	Thioredoxin reductase 1, cytoplasmic OS=Mus musculus GN=Txnrd1 PE=1 SV=3	802
-0.245	-0.08	-0.15	-0.84	-0.19	False		FALSE	FALSE	FALSE	-0.301	196806	220140	416946	0	8.211	10	3	3	0	3	0	42	1	46.4	0.688491	261.8	428.2	Q91W90	Thioredoxin domain-containing protein 5 OS=Mus musculus GN=Txndc5 PE=1 SV=2	427
0.395	0.56	2.12	-1.8	0.27	False		FALSE	FALSE	FALSE	0.309	121948	229640	351588	0	8.208	6	1	4	1	1	0	94	1	24.6	0.41544	472.8	215	P09671	Superoxide dismutase [Mn], mitochondrial OS=Mus musculus GN=Sod2 PE=1 SV=3	69
-0.815	-0.36	0.02	1.26	-0.47	False		FALSE	FALSE	FALSE	-0.073	53475.1	48432.9	101908	0	8.182	6	2	2	2	2	0	68	1	91.3	0.889844	294.4	393.2	Q8JZQ9	Eukaryotic translation initiation factor 3 subunit B OS=Mus musculus GN=Eif3b PE=1 SV=1	184
1.615	1.11	2.25	1.47	3.11	False		TRUE	FALSE	TRUE	1.911	138767	442290	581057	0	8.142	12	2	3	0	2	0	59	1	20.2	0.000721471	650.6	36.2	F8WI88	PEST proteolytic signal-containing nuclear protein OS=Mus musculus GN=Pcnp PE=1 SV=1	290
-0.035	-0.47	-0.6	0.29	-0.27	False		FALSE	FALSE	FALSE	-0.217	430715	461131	891846	0	8.066	6	2	7	0	2	0	147	1	24.6	0.743202	272.4	415.4	P63163	Small nuclear ribonucleoprotein-associated protein N OS=Mus musculus GN=Snrpn PE=1 SV=1	823
-1.505	-2.22	-2.56	-2.22	-1.87	False		TRUE	TRUE	FALSE	-2.075	269830	86137.4	355967	0	8.016	11	2	3	1	2	0	104	1	21.7	0.0017239	51.2	636	Q9D0R8	Protein LSM12 homolog OS=Mus musculus GN=Lsm12 PE=1 SV=1	461
0.415	0.72	0.06	-0.15	0.41	False		FALSE	FALSE	FALSE	0.291	108808	191159	299967	0	8.015	5	2	7	2	2	0	76	1	57.5	0.389421	481.6	206.2	Q8JZK9	Hydroxymethylglutaryl-CoA synthase, cytoplasmic OS=Mus musculus GN=Hmgcs1 PE=1 SV=1	139
0.525	0.12	0.7	-1.75	0.54	False		FALSE	FALSE	FALSE	0.027	147605	182586	330191	0	7.969	8	2	2	0	2	0	56	1	42.5	0.565407	436.6	251.2	O08804	NK13 OS=Mus musculus GN=Serpinb6b PE=1 SV=2	729
-1.555	-2.92	-2.06	-1.33	-1.67	False		TRUE	TRUE	FALSE	-1.907	635912	149534	785446	0	7.954	17	3	7	3	3	0	47	1	21.1	0.00521355	66.8	620	Q9CQE5	Regulator of G-protein signaling 10 OS=Mus musculus GN=Rgs10 PE=1 SV=1	64
-0.385	0.26	-1.36	0.15	-0.89	False		FALSE	FALSE	FALSE	-0.445	71980.3	57090.2	129071	0	7.908	2	2	4	0	2	0	84	1	105.9	0.618006	252.2	436	Q8K019	Bcl-2-associated transcription factor 1 OS=Mus musculus GN=Bclaf1 PE=1 SV=2	280
0.045	-0.07	-0.16	0.41	0.85	False		FALSE	FALSE	FALSE	0.215	156696	150214	306910	0	7.897	3	3	3	0	3	0	68	1	141.3	0.686723	408	282.4	G3UY93	Valine--tRNA ligase (Fragment) OS=Mus musculus GN=Vars PE=1 SV=1	124
0.975	0.81	2.14	3.16	0.03	False		TRUE	FALSE	TRUE	1.423	133723	237296	371019	0	7.796	7	2	2	2	2	0	64	1	37.8	0.0438385	590.2	97.8	P18155	Bifunctional methylenetetrahydrofolate dehydrogenase/cyclohydrolase, mitochondrial OS=Mus musculus GN=Mthfd2 PE=1 SV=1	113
0.715	0.61	0.3	1.02	1.17	False		FALSE	FALSE	FALSE	0.763	99882	210198	310080	0	7.706	6	3	3	0	3	0	57	1	61.3	0.0745564	572.4	115.2	Q8BIQ5	Cleavage stimulation factor subunit 2 OS=Mus musculus GN=Cstf2 PE=1 SV=2	350
0.085	-0.13	0.03	0.03	0.13	False		FALSE	FALSE	FALSE	0.029	853833	944509	1798340	0	7.622	7	2	7	0	2	0	59	1	29.8	0.869111	358.4	329.8	Q6NZB0	DnaJ homolog subfamily C member 8 OS=Mus musculus GN=Dnajc8 PE=1 SV=2	165
-0.725	-1.08	0.34	-1.46	-1.31	False		FALSE	FALSE	FALSE	-0.847	167181	107614	274795	0	7.613	5	3	4	3	3	0	53	1	81.8	0.195318	172.2	515.6	Q9CZD3	Glycine--tRNA ligase OS=Mus musculus GN=Gars PE=1 SV=1	371
0.835	-1.02	-0.71	0.36	-0.19	False		FALSE	FALSE	FALSE	-0.145	154682	184668	339350	0	7.585	3	2	2	2	2	0	54	1	69	0.972114	326.6	362.4	Q6A028	Switch-associated protein 70 OS=Mus musculus GN=Swap70 PE=1 SV=2	926
-1.095	1.19	0.71	0.76	-2.16	False		FALSE	FALSE	FALSE	-0.119	100820	124986	225806	0	7.567	12	2	3	1	2	0	74	1	17.1	0.859239	361.2	326.8	P61089	Ubiquitin-conjugating enzyme E2 N OS=Mus musculus GN=Ube2n PE=1 SV=1	817
0.605	-0.19	-0.09	0.84	1.45	False		FALSE	FALSE	FALSE	0.523	616383	928290	1544670	0	7.552	20	2	4	2	2	0	93	1	13.3	0.392252	476.8	210.6	P62315	Small nuclear ribonucleoprotein Sm D1 OS=Mus musculus GN=Snrpd1 PE=1 SV=1	216
-0.335	0.04	-2.61	0.18	0.05	False		FALSE	FALSE	FALSE	-0.535	184225	188971	373196	0	7.547	7	2	3	0	2	0	57	1	31.8	0.755164	274.6	413.6	Q9R059	Four and a half LIM domains protein 3 OS=Mus musculus GN=Fhl3 PE=1 SV=2	322
0.275	-1.2	-2.85	-0.23	-3.26	False		FALSE	FALSE	FALSE	-1.453	625501	311633	937134	0	7.529	11	3	5	0	3	0	37	1	36.9	0.239364	186.2	502.4	Q9WVA3	Mitotic checkpoint protein BUB3 OS=Mus musculus GN=Bub3 PE=1 SV=2	818
-1.625	-3.07	-3.36	-4.42	-2.26	False		TRUE	TRUE	FALSE	-2.947	527735	80758.6	608494	0	7.493	5	2	7	0	2	0	182	1	56	0.000217283	31.2	655.4	P56477	Interferon regulatory factor 5 OS=Mus musculus GN=Irf5 PE=1 SV=1	664
0.005	0.53	0.54	0.74	0.27	False		FALSE	FALSE	FALSE	0.417	77444.4	115393	192838	0.001	7.472	10	1	2	0	1	0	55	1	17.3	0.389421	479.4	208.6	Q9WU28	Prefoldin subunit 5 OS=Mus musculus GN=Pfdn5 PE=1 SV=1	203
0.295	0.00999999	-0.38	0.74	0.09	False		FALSE	FALSE	FALSE	0.151	120932	148341	269273	0.001	7.455	5	1	7	1	1	0	51	1	45.1	0.690159	406.8	284.8	Q60737	Casein kinase II subunit alpha OS=Mus musculus GN=Csnk2a1 PE=1 SV=2	153
0.395	0.12	0.11	0.13	0	False		FALSE	FALSE	FALSE	0.151	421712	530987	952698	0.001	7.433	5	2	3	1	2	0	44	1	49.2	0.682697	409.4	280.2	Q810D6	Glutamate-rich WD repeat-containing protein 1 OS=Mus musculus GN=Grwd1 PE=1 SV=2	725
-0.415	-0.51	-0.55	1.7	-0.59	False		FALSE	FALSE	FALSE	-0.073	675613	637035	1312650	0.001	7.424	7	1	8	0	1	0	190	1	15	0.737718	270.2	418.2	A0A0A6YX26	60S ribosomal protein L31 OS=Mus musculus GN=Rpl31 PE=1 SV=1	708
-0.195	0.99	-0.93	-0.75	2.52	False		FALSE	FALSE	FALSE	0.327	38131.4	48742.7	86874.1	0.002	7.36	5	1	2	0	1	0	28	1	32	0.800669	381.2	307.4	J3QPW1	Phosphatidylinositol transfer protein alpha isoform OS=Mus musculus GN=Pitpna PE=1 SV=1	66
-0.345	-0.35	0.44	-2.44	-0.38	False		FALSE	FALSE	FALSE	-0.615	178339	169465	347805	0.002	7.358	2	1	2	1	1	0	47	1	48.3	0.430783	223.4	464.2	P29758	Ornithine aminotransferase, mitochondrial OS=Mus musculus GN=Oat PE=1 SV=1	804
0.065	-0.89	-0.44	1.6	-1.21	False		FALSE	FALSE	FALSE	-0.175	332682	294735	627417	0.002	7.352	16	2	4	2	2	0	65	1	14.5	0.857391	288.6	400	Q9D7S7	60S ribosomal protein L22-like 1 OS=Mus musculus GN=Rpl22l1 PE=1 SV=1	535
-0.525	1.3	-1.4	0.8	0.16	False		FALSE	FALSE	FALSE	0.067	474863	526487	1001350	0.002	7.343	2	2	6	0	2	0	85	1	76.2	0.811503	378.8	310.2	Q61584	Fragile X mental retardation syndrome-related protein 1 OS=Mus musculus GN=Fxr1 PE=1 SV=2	3
2.145	0.73	2.01	0.06	1.9	False		TRUE	FALSE	TRUE	1.369	90482	343826	434308	0.002	7.331	3	2	2	0	2	0	65	1	92.8	0.0438385	589.6	97.8	P97311	DNA replication licensing factor MCM6 OS=Mus musculus GN=Mcm6 PE=1 SV=1	697
0.225	0.22	0.78	0.91	0.33	False		FALSE	FALSE	FALSE	0.493	76708.5	127220	203929	0.002	7.22	10	1	2	0	1	0	50	1	14.1	0.315992	506.4	183	Q9DCG9	Multifunctional methyltransferase subunit TRM112-like protein OS=Mus musculus GN=Trmt112 PE=1 SV=1	191
0.605	-0.19	0.53	2.15	-0.55	False		FALSE	FALSE	FALSE	0.509	447380	476965	924344	0.002	7.183	8	1	3	0	1	0	69	1	14.4	0.598452	429.8	258.8	Q642K5	40S ribosomal protein S30 OS=Mus musculus GN=Fau PE=1 SV=1	514
0.215	-0.16	-0.34	0.22	0.05	False		FALSE	FALSE	FALSE	-0.003	386454	462843	849297	0.002	7.119	9	1	3	1	1	0	107	1	9.7	0.906168	352	338	P62307	Small nuclear ribonucleoprotein F OS=Mus musculus GN=Snrpf PE=1 SV=1	640
0.115	0.18	-0.03	-0.22	0.27	False		FALSE	FALSE	FALSE	0.063	576944	678189	1255130	0.002	7.044	9	3	4	1	3	0	36	1	34.3	0.738509	395.4	294.2	Q9CVB6	Actin-related protein 2/3 complex subunit 2 OS=Mus musculus GN=Arpc2 PE=1 SV=3	32
-2.575	-0.58	-2.26	0.25	-1.48	False		FALSE	FALSE	FALSE	-1.329	35160.7	18548.8	53709.5	0.002	7.023	3	1	2	1	1	0	75	1	38.3	0.0963319	141	546.8	O35685	Nuclear migration protein nudC OS=Mus musculus GN=Nudc PE=1 SV=1	293
-1.135	-1.24	-1.83	-0.42	-0.81	False		FALSE	FALSE	FALSE	-1.087	302063	141051	443114	0.002	6.962	1	1	6	1	1	0	44	1	98.1	0.0574552	124	563	Q3UJB0	Putative uncharacterized protein OS=Mus musculus GN=Sf3b2 PE=1 SV=1	845
0.165	0.22	-0.02	1.18	2.13	False		FALSE	FALSE	FALSE	0.735	112810	181780	294589	0.002	6.861	5	2	2	1	2	0	25	1	90	0.332767	499.2	188.8	O35601	FYN-binding protein OS=Mus musculus GN=Fyb PE=1 SV=2	144
0.335	-0.42	0.07	-0.06	0.25	False		FALSE	FALSE	FALSE	0.035	391352	364991	756343	0.002	6.784	2	3	4	3	3	0	44	1	126.8	0.803591	381.2	308.2	Q3U1J4	DNA damage-binding protein 1 OS=Mus musculus GN=Ddb1 PE=1 SV=2	610
-0.305	-0.35	-0.59	0.14	0.41	False		FALSE	FALSE	FALSE	-0.139	95665.3	115563	211229	0.002	6.76	5	2	2	1	2	0	44	1	54	0.997817	316.2	372.8	Q8BH43	Wiskott-Aldrich syndrome protein family member 2 OS=Mus musculus GN=Wasf2 PE=1 SV=1	318
-2.665	-1.53	-2.28	-1.1	-1.97	False		TRUE	TRUE	FALSE	-1.909	86138.1	21402.8	107541	0.002	6.696	4	2	3	2	2	0	50	1	75.6	0.00542181	67.8	619	Q5F2E7	Nuclear fragile X mental retardation-interacting protein 2 OS=Mus musculus GN=Nufip2 PE=1 SV=1	337
-0.115	0.41	1.49	-0.1	-0.06	False		FALSE	FALSE	FALSE	0.325	42641.7	96955.5	139597	0.002	6.695	4	2	3	0	2	0	101	1	72.4	0.671858	413.8	276.2	Q8VCT3	Aminopeptidase B OS=Mus musculus GN=Rnpep PE=1 SV=2	801
0.025	2.53	-1.75	0.68	-0.34	False		FALSE	FALSE	FALSE	0.229	86445.1	69566.1	156011	0.002	6.664	4	2	3	0	2	0	39	1	85.2	0.847371	367	321.8	P47713	Cytosolic phospholipase A2 OS=Mus musculus GN=Pla2g4a PE=1 SV=1	905
0.255	0	1.89	-0.27	0.03	False		FALSE	FALSE	FALSE	0.381	314172	568797	882969	0.002	6.519	6	3	3	2	3	0	25	1	57.4	0.646563	421.6	269	Q61035	Histidine--tRNA ligase, cytoplasmic OS=Mus musculus GN=Hars PE=1 SV=2	618
-0.395	-0.5	-1.41	0.07	0.06	False		FALSE	FALSE	FALSE	-0.435	616226	278287	894513	0.002	6.495	8	2	3	0	2	0	100	1	23.5	0.541731	241.2	448	P84099	60S ribosomal protein L19 OS=Mus musculus GN=Rpl19 PE=1 SV=1	364
2.905	2.32	1.6	2.24	2.73	False		TRUE	FALSE	TRUE	2.359	280659	623268	903927	0.002	6.461	16	2	10	2	2	0	138	1	7.1	0.000199591	660.8	26	Q8K003	Translation machinery-associated protein 7 OS=Mus musculus GN=Tma7 PE=3 SV=1	228
0.395	-0.36	-0.14	-0.14	0.49	False		FALSE	FALSE	FALSE	0.049	209864	245988	455852	0.002	6.44	9	2	4	2	2	0	41	1	20.8	0.743442	394.4	295	Q9CPU0	Lactoylglutathione lyase OS=Mus musculus GN=Glo1 PE=1 SV=3	98
-0.205	-0.39	-0.02	-0.67	1.83	False		FALSE	FALSE	FALSE	0.109	399731	378013	777744	0.002	6.415	12	2	3	0	2	0	63	1	24.4	0.950642	335.4	352.2	P62827	GTP-binding nuclear protein Ran OS=Mus musculus GN=Ran PE=1 SV=3	786
-3.175	-4.05	-0.92	-1.69	-2.59	False		TRUE	TRUE	FALSE	-2.485	121288	20695.7	141984	0.002	6.351	8	1	2	1	1	0	66	1	17.6	0.00262713	56.6	630.6	Q9D3D9	ATP synthase subunit delta, mitochondrial OS=Mus musculus GN=Atp5d PE=1 SV=1	543
-0.275	-0.23	0.98	0.63	-0.07	False		FALSE	FALSE	FALSE	0.207	122275	133251	255526	0.002	6.343	3	1	3	0	1	0	57	1	42.6	0.847371	366.4	322	Q91Z50	Flap endonuclease 1 OS=Mus musculus GN=Fen1 PE=1 SV=1	627
-0.425	3.08	1.07	1.47	-0.26	False		FALSE	FALSE	FALSE	0.987	258430	423269	681699	0.002	6.298	10	2	3	0	2	0	41	1	18.7	0.484283	459.6	229	O70492	Sorting nexin-3 OS=Mus musculus GN=Snx3 PE=1 SV=3	898
-0.255	-0.47	0.96	-1.47	0.00999999	False		FALSE	FALSE	FALSE	-0.245	202466	198553	401020	0.002	6.236	12	3	3	0	3	0	24	1	41.5	0.820983	284.4	406	P42208	Septin-2 OS=Mus musculus GN=Sept2 PE=1 SV=2	520
0.545	-0.26	-0.24	0.66	-0.3	False		FALSE	FALSE	FALSE	0.081	189719	307808	497527	0.002	6.226	13	1	5	1	1	0	204	1	10.2	0.84141	369	317.8	P49962	Signal recognition particle 9 kDa protein OS=Mus musculus GN=Srp9 PE=1 SV=2	61
-1.345	-2.47	-2.32	-2.41	-2.92	False	Fratu	TRUE	TRUE	FALSE	-2.293	254883	69904	324787	0.002	6.203	20	2	2	2	2	0	34	1	12	0.00125714	46.8	640	K0E7R0	Thioredoxin OS=Francisella tularensis subsp. holarctica FSC200 GN=trx1 PE=3 SV=1	766
0.365	0.18	0.58	-0.2	0.54	False		FALSE	FALSE	FALSE	0.293	137066	172976	310042	0.002	6.179	4	2	3	0	2	0	47	1	59.7	0.438026	470.6	219.4	A0A0R4J138	Arylsulfatase B OS=Mus musculus GN=Arsb PE=1 SV=1	115
-0.295	-0.04	0.22	0.89	-0.32	False		FALSE	FALSE	FALSE	0.091	249254	264017	513271	0.002	6.113	5	2	3	0	2	0	45	1	59.7	0.922783	345.6	343.4	Q03265	ATP synthase subunit alpha, mitochondrial OS=Mus musculus GN=Atp5a1 PE=1 SV=1	385
-1.265	-1.53	-3.32	-0.65	-0.2	False		FALSE	FALSE	FALSE	-1.393	790405	252122	1042530	0.002	6.098	17	2	4	0	2	0	28	1	14.2	0.08112	134.2	554.2	Q9CQF7	Prefoldin 1 OS=Mus musculus GN=Pfdn1 PE=1 SV=1	158
0.425	-0.51	-0.72	-0.26	-0.53	False		FALSE	FALSE	FALSE	-0.319	408685	349679	758363	0.002	6.086	5	1	6	0	1	0	139	1	20.5	0.743202	271.6	416	Q9D868	Peptidyl-prolyl cis-trans isomerase H OS=Mus musculus GN=Ppih PE=1 SV=1	764
0.285	0.1	1.11	-1.49	0.25	False		FALSE	FALSE	FALSE	0.051	474576	684903	1159480	0.002	6.073	4	1	3	1	1	0	82	1	25.5	0.672961	412.2	277.2	Q62093	Serine/arginine-rich splicing factor 2 OS=Mus musculus GN=Srsf2 PE=1 SV=4	908
-0.185	0.37	1.82	0.26	-0.1	False		FALSE	FALSE	FALSE	0.433	90120.6	111104	201224	0.002	6.068	9	1	1	0	1	0	58	1	15.2	0.625326	425.6	264.2	Q3UWL8	Prefoldin subunit 4 OS=Mus musculus GN=Pfdn4 PE=1 SV=1	388
-0.685	-2.18	0.1	-0.25	-3.2	False		FALSE	FALSE	FALSE	-1.243	147952	92853.7	240806	0.002	6.065	5	2	3	2	2	0	64	1	56.6	0.191857	171.2	516.6	Q99K28	ADP-ribosylation factor GTPase-activating protein 2 OS=Mus musculus GN=Arfgap2 PE=1 SV=1	645
-0.105	0.1	0.62	-0.51	0.15	False		FALSE	FALSE	FALSE	0.051	144631	133795	278425	0.002	5.932	3	1	4	0	1	0	59	1	44.7	0.844205	372.2	318.4	Q9CZ30	Obg-like ATPase 1 OS=Mus musculus GN=Ola1 PE=1 SV=1	772
-0.005	-0.17	0.03	0.44	0.08	False		FALSE	FALSE	FALSE	0.075	160365	194474	354839	0.002	5.908	5	1	4	1	1	0	48	1	19.3	0.874296	358.8	331.2	P84104	Serine/arginine-rich splicing factor 3 OS=Mus musculus GN=Srsf3 PE=1 SV=1	712
0.755	1.04	2.02	4.64	1.37	False		TRUE	FALSE	TRUE	1.965	87829	240177	328006	0.002	5.899	16	2	2	2	2	0	33	1	15.5	0.000666847	652.4	34.8	P63276	40S ribosomal protein S17 OS=Mus musculus GN=Rps17 PE=1 SV=2	475
0.155	-0.06	-0.55	0.76	-0.27	False		FALSE	FALSE	FALSE	0.00699999	109943	127839	237782	0.002	5.892	4	2	3	0	2	0	54	1	55	0.928877	345.4	345.4	D3YYI8	Histone deacetylase OS=Mus musculus GN=Gm10093 PE=3 SV=1	39
-1.585	-3.6	-2.13	-1.18	-1.94	False		TRUE	TRUE	FALSE	-2.087	117685	42596.7	160282	0.002	5.858	2	1	1	1	1	0	63	1	45.7	0.00507801	66	620.8	Q9QYJ0	DnaJ homolog subfamily A member 2 OS=Mus musculus GN=Dnaja2 PE=1 SV=1	775
0.335	0.03	-0.09	0.14	0.47	False		FALSE	FALSE	FALSE	0.177	238978	326350	565328	0.002	5.853	10	2	3	2	2	0	57	1	30.8	0.58568	433.2	255.8	Q8BL97	Serine/arginine-rich splicing factor 7 OS=Mus musculus GN=Srsf7 PE=1 SV=1	29
0.025	0.2	0.64	-0.24	0.41	False		FALSE	FALSE	FALSE	0.207	213668	281810	495478	0.002	5.851	4	2	2	2	2	0	52	1	64.2	0.610346	429.4	261	Q8BP47	Asparagine--tRNA ligase, cytoplasmic OS=Mus musculus GN=Nars PE=1 SV=2	488
-0.445	-0.53	-0.61	3.62	-0.8	False		FALSE	FALSE	FALSE	0.247	284858	252854	537712	0.002	5.814	2	1	3	1	1	0	31	1	43.5	0.721983	267	420.2	P54728	UV excision repair protein RAD23 homolog B OS=Mus musculus GN=Rad23b PE=1 SV=2	456
-0.455	-0.41	-1	1.86	0.13	False		FALSE	FALSE	FALSE	0.025	53901.8	81992	135894	0.002	5.787	4	1	1	1	1	0	74	1	35	0.995794	313.4	375	Q99LC5	Electron transfer flavoprotein subunit alpha, mitochondrial OS=Mus musculus GN=Etfa PE=1 SV=2	2
0.855	0.51	0.96	0.03	0.28	False		FALSE	FALSE	FALSE	0.527	267808	496571	764378	0.002	5.779	16	3	3	0	3	0	27	1	25.2	0.242737	522	167.6	Q60631	Growth factor receptor-bound protein 2 OS=Mus musculus GN=Grb2 PE=1 SV=1	269
0.385	1.83	0.7	0.9	0.26	False		FALSE	FALSE	FALSE	0.815	70965.2	135961	206926	0.002	5.763	4	1	2	0	1	0	44	1	50.2	0.135702	554	134.4	Q61152	Tyrosine-protein phosphatase non-receptor type 18 OS=Mus musculus GN=Ptpn18 PE=1 SV=1	759
0.395	0.63	0.46	-0.86	0.19	False		FALSE	FALSE	FALSE	0.163	60292.5	113422	173714	0.002	5.734	4	1	4	1	1	0	86	1	21.6	0.524923	449.6	240.8	P00375	Dihydrofolate reductase OS=Mus musculus GN=Dhfr PE=1 SV=3	549
0.485	0.41	0.41	0.62	0.18	False		FALSE	FALSE	FALSE	0.421	79330	115122	194452	0.002	5.67	4	1	1	0	1	0	43	1	35.1	0.332767	500	189.2	Q9CQR6	Serine/threonine-protein phosphatase 6 catalytic subunit OS=Mus musculus GN=Ppp6c PE=1 SV=1	275
0.125	3.07	1.81	1.62	1.35	False		TRUE	FALSE	TRUE	1.595	238400	544370	782770	0.002	5.62	8	2	2	0	2	0	39	1	29.4	0.0254797	604	84.6	Q3TE40	Putative uncharacterized protein OS=Mus musculus GN=Rpa2 PE=1 SV=1	367
-0.495	0.67	0.08	0.78	-0.1	False		FALSE	FALSE	FALSE	0.187	81652.1	104320	185972	0.003	5.537	9	2	3	2	2	0	15	1	38.1	0.738509	395.6	293.6	Q9CX34	Protein SGT1 homolog OS=Mus musculus GN=Sugt1 PE=1 SV=3	621
-2.405	0.14	-0.99	-0.07	-0.39	False		FALSE	FALSE	FALSE	-0.743	69877	67659.9	137537	0.003	5.536	4	3	3	2	3	0	0	1	102	0.415332	220.2	468.8	Q78PY7	Staphylococcal nuclease domain-containing protein 1 OS=Mus musculus GN=Snd1 PE=1 SV=1	162
-1.715	-1.03	-0.75	0.21	-0.47	False		FALSE	FALSE	FALSE	-0.751	96385.8	71627.7	168013	0.003	5.507	4	2	2	0	2	0	19	1	82.4	0.22998	181.4	507	Q52KC3	DNA helicase OS=Mus musculus GN=Mcm5 PE=1 SV=1	21
-2.595	0.32	-2.29	-4.68	0.53	False		FALSE	FALSE	FALSE	-1.743	31231.1	31046.6	62277.7	0.003	5.455	25	1	3	1	1	0	34	1	6.8	0.520969	236.8	450.8	P56394	Cytochrome c oxidase copper chaperone OS=Mus musculus GN=Cox17 PE=1 SV=2	644
1.655	1.7	0.21	1.57	0.27	False		FALSE	FALSE	FALSE	1.081	233129	295023	528152	0.003	5.454	22	2	3	1	2	0	34	1	12.5	0.0822167	569	119.6	P16254	Signal recognition particle 14 kDa protein OS=Mus musculus GN=Srp14 PE=1 SV=1	863
-0.225	-0.96	-2.29	-0.05	-0.94	False		FALSE	FALSE	FALSE	-0.893	100532	76390.8	176923	0.003	5.445	4	1	2	1	1	0	0	1	54.2	0.188445	170	518.4	P54823	Probable ATP-dependent RNA helicase DDX6 OS=Mus musculus GN=Ddx6 PE=1 SV=1	528
-0.675	0.67	-0.73	0.72	0.35	False		FALSE	FALSE	FALSE	0.067	60900	45739	106639	0.003	5.412	2	1	2	0	1	0	33	1	39.9	0.738509	395.8	292.4	Q9CX56	26S proteasome non-ATPase regulatory subunit 8 OS=Mus musculus GN=Psmd8 PE=1 SV=2	114
1.715	1.37	2.7	-0.54	1.52	False		FALSE	FALSE	FALSE	1.353	281760	707222	988982	0.003	5.386	4	2	4	1	2	0	64	1	43.7	0.0637029	576.8	110	P50580	Proliferation-associated protein 2G4 OS=Mus musculus GN=Pa2g4 PE=1 SV=3	161
-0.225	-3.73	-0.73	5.4	-0.3	False		FALSE	FALSE	FALSE	0.083	45967.2	44521	90488.2	0.003	5.384	3	1	3	1	1	0	0	1	124	0.737718	270.4	417	Q5SXA9	Protein KIBRA OS=Mus musculus GN=Wwc1 PE=1 SV=1	915
-2.025	0.6	-0.67	-2.52	-5.11	False		FALSE	FALSE	FALSE	-1.945	68194.6	30485.7	98680.4	0.003	5.367	5	2	2	0	1	0	23	1	54.1	0.188445	169.6	518	P97379	Ras GTPase-activating protein-binding protein 2 OS=Mus musculus GN=G3bp2 PE=1 SV=2	294
-0.685	0.45	-0.02	1.64	-0.12	False		FALSE	FALSE	FALSE	0.253	70939.7	80621.5	151561	0.003	5.364	2	1	2	1	1	0	24	1	66.7	0.750885	391	298	Q9JLZ6	Hypermethylated in cancer 2 protein OS=Mus musculus GN=Hic2 PE=2 SV=4	700
-0.035	-0.00999999	-0.32	1.52	-0.77	False		FALSE	FALSE	FALSE	0.077	219044	236366	455410	0.003	5.348	8	1	4	1	1	0	67	1	12.4	0.962671	333	355.8	P83882	60S ribosomal protein L36a OS=Mus musculus GN=Rpl36a PE=1 SV=2	771
1.035	0.09	-1.14	-0.48	-0.37	False		FALSE	FALSE	FALSE	-0.173	149964	138675	288640	0.003	5.338	6	2	2	1	2	0	26	1	62.3	0.985437	321	367.4	Q6PAM1	Alpha-taxilin OS=Mus musculus GN=Txlna PE=1 SV=1	410
-1.555	-0.77	-0.88	-1	-0.96	False		FALSE	FALSE	FALSE	-1.033	53452.4	20881.5	74334	0.003	5.327	3	2	2	2	2	0	27	1	105.5	0.050846	120.6	566.6	Q8R1B4	Eukaryotic translation initiation factor 3 subunit C OS=Mus musculus GN=Eif3c PE=1 SV=1	348
0.375	-0.09	-0.49	0.11	0	False		FALSE	FALSE	FALSE	-0.019	139900	153606	293506	0.003	5.297	3	1	2	0	1	0	23	1	52.8	0.898741	353	336.8	Q9JMD0	BUB3-interacting and GLEBS motif-containing protein ZNF207 OS=Mus musculus GN=Znf207 PE=1 SV=1	214
1.905	-1.39	1.19	3.6	1.25	False		FALSE	FALSE	FALSE	1.311	12954.7	47640.9	60595.6	0.003	5.297	1	1	1	0	1	0	37	1	161.1	0.193741	529	157.6	F8WIA1	CAP-Gly domain-containing linker protein 1 OS=Mus musculus GN=Clip1 PE=1 SV=1	716
-0.625	-0.48	-1.02	-0.62	-0.86	False		FALSE	FALSE	FALSE	-0.721	230334	186984	417318	0.003	5.29	8	2	2	0	2	0	35	1	46.6	0.144734	158.4	529.4	Q7TNC4	Putative RNA-binding protein Luc7-like 2 OS=Mus musculus GN=Luc7l2 PE=1 SV=1	612
0.165	0.58	1.43	0.52	0.17	False		FALSE	FALSE	FALSE	0.573	126167	186432	312598	0.003	5.257	11	1	3	0	1	0	96	1	9.1	0.324121	504	185.4	E9QMV2	Costars family protein ABRACL OS=Mus musculus GN=Abracl PE=1 SV=1	617
-1.965	1.11	0.05	-0.4	-1.35	False		FALSE	FALSE	FALSE	-0.511	69284	61450.1	130734	0.003	5.248	2	2	2	2	2	0	20	1	116.6	0.7582	275.2	412.8	Q64727	Vinculin OS=Mus musculus GN=Vcl PE=1 SV=4	13
-0.325	-0.76	-1.25	-0.33	-0.34	False		FALSE	FALSE	FALSE	-0.601	90300.8	59970.6	150271	0.003	5.245	3	1	2	0	1	0	33	1	40.7	0.249402	189.4	500	Q3UND0	Src kinase-associated phosphoprotein 2 OS=Mus musculus GN=Skap2 PE=1 SV=2	209
0.445	0.04	0.14	0.27	0.07	False		FALSE	FALSE	FALSE	0.193	222308	297544	519853	0.003	5.226	4	1	3	1	1	0	88	1	25.2	0.629358	423.2	265.2	Q6IRU5	Clathrin light chain B OS=Mus musculus GN=Cltb PE=1 SV=1	715
2.815	2.51	2.14	3.75	2.34	False		TRUE	FALSE	TRUE	2.711	43458.9	265199	308658	0.003	5.206	3	2	8	1	1	0	60	1	58.7	2.47e-05	672.4	14.6	Q8R326	Paraspeckle component 1 OS=Mus musculus GN=Pspc1 PE=1 SV=1	603
0.415	0.38	2.37	-0.1	0.19	False		FALSE	FALSE	FALSE	0.651	61625.8	70659.6	132285	0.003	5.192	9	1	1	0	1	0	48	1	18.4	0.318661	506.2	183.8	F6X9I3	Peptidylprolyl isomerase (Fragment) OS=Mus musculus GN=Fkbp1a PE=1 SV=1	509
-0.115	0.04	-0.61	0.58	-0.14	False		FALSE	FALSE	FALSE	-0.049	188556	205943	394500	0.003	5.189	3	1	5	0	1	0	74	1	31.8	0.981843	324.8	366	Q62189	U1 small nuclear ribonucleoprotein A OS=Mus musculus GN=Snrpa PE=1 SV=3	321
-0.145	0.28	1.75	1.48	-0.1	False		FALSE	FALSE	FALSE	0.653	40175.2	81864.1	122039	0.004	5.118	3	2	2	0	2	0	29	1	71.4	0.468169	464	225.6	Q5SWN2	Replication protein A 70 kDa DNA-binding subunit OS=Mus musculus GN=Rpa1 PE=1 SV=2	156
-4.395	-1.77	-0.62	-1.14	-1.8	False		TRUE	TRUE	FALSE	-1.945	89285.9	32734.1	122020	0.004	5.097	9	1	1	1	1	0	44	1	18	0.0154333	89.4	597.6	Q9CPT4	Myeloid-derived growth factor OS=Mus musculus GN=Mydgf PE=1 SV=1	383
-1.125	-0.14	-1.84	-4.33	-0.15	False		FALSE	FALSE	FALSE	-1.517	97242.1	38622.1	135864	0.004	5.065	4	1	2	0	1	0	37	1	45.1	0.115188	147.8	540.8	P11157	Ribonucleoside-diphosphate reductase subunit M2 OS=Mus musculus GN=Rrm2 PE=1 SV=1	320
0.485	0.4	1.21	-0.8	0.31	False		FALSE	FALSE	FALSE	0.321	66322	133285	199607	0.004	4.986	8	1	2	0	1	0	27	1	15.5	0.389421	483.6	205.2	P21460	Cystatin-C OS=Mus musculus GN=Cst3 PE=1 SV=2	436
0.095	-0.59	-0.53	0.68	-0.35	False		FALSE	FALSE	FALSE	-0.139	188405	183950	372355	0.004	4.976	22	2	4	1	2	0	0	1	17.9	0.895662	296.6	393.2	P62983	Ubiquitin-40S ribosomal protein S27a OS=Mus musculus GN=Rps27a PE=1 SV=2	460
-1.005	-0.41	-1.55	-0.44	-1.04	False		FALSE	FALSE	FALSE	-0.889	278374	163314	441688	0.004	4.963	4	2	3	2	2	0	27	1	108.6	0.115188	147.4	541.2	Q9DBR1	5'-3' exoribonuclease 2 OS=Mus musculus GN=Xrn2 PE=1 SV=1	58
-0.175	-0.53	-0.95	0.13	-0.99	False		FALSE	FALSE	FALSE	-0.503	319190	223401	542592	0.004	4.939	3	1	1	1	1	0	57	1	44.3	0.330114	206.2	482.2	Q8QZY9	Splicing factor 3B subunit 4 OS=Mus musculus GN=Sf3b4 PE=1 SV=1	629
-1.315	-2.45	1.05	-2.24	-1.79	False		FALSE	FALSE	FALSE	-1.349	69788.5	34901.1	104690	0.004	4.919	3	1	2	0	1	0	13	1	36.6	0.135735	155.2	532.2	D3Z2U7	cAMP-responsive element modulator (Fragment) OS=Mus musculus GN=Crem PE=1 SV=1	745
-0.265	-1.6	-2.48	0.2	-0.42	False		FALSE	FALSE	FALSE	-0.913	230384	93615.8	324000	0.004	4.901	6	3	3	3	3	0	41	1	92.1	0.239304	185.4	502.4	Q6A068	Cell division cycle 5-like protein OS=Mus musculus GN=Cdc5l PE=1 SV=2	480
0.445	0.31	1.29	-1.14	0.29	False		FALSE	FALSE	FALSE	0.239	65402.5	98107.6	163510	0.004	4.858	3	1	2	1	1	0	18	1	50.9	0.464381	465.2	223.8	P54071	Isocitrate dehydrogenase [NADP], mitochondrial OS=Mus musculus GN=Idh2 PE=1 SV=3	405
-0.305	0.83	0.02	-1.03	-0.31	False		FALSE	FALSE	FALSE	-0.159	107527	131217	238744	0.004	4.85	9	2	2	2	2	0	14	1	28.1	0.997817	316.4	372.6	P20108	Thioredoxin-dependent peroxide reductase, mitochondrial OS=Mus musculus GN=Prdx3 PE=1 SV=1	387
-1.305	-0.82	-0.73	-0.39	-2.64	False		FALSE	FALSE	FALSE	-1.177	257219	190930	448149	0.004	4.822	2	2	2	0	2	0	34	1	108.4	0.08112	134.8	553.4	Q9R1C7	Pre-mRNA-processing factor 40 homolog A OS=Mus musculus GN=Prpf40a PE=1 SV=1	691
0.035	-0.3	1.19	-1.68	0.12	False		FALSE	FALSE	FALSE	-0.127	285290	373851	659141	0.004	4.817	5	1	1	1	1	0	50	1	28.4	0.96342	331.2	357.2	O70435	Proteasome subunit alpha type-3 OS=Mus musculus GN=Psma3 PE=1 SV=3	438
0.075	0.1	0.65	-0.8	0.19	False		FALSE	FALSE	FALSE	0.043	332877	432196	765073	0.004	4.798	28	2	3	2	2	0	27	1	14.5	0.790795	386.2	305.4	P61971	Nuclear transport factor 2 OS=Mus musculus GN=Nutf2 PE=1 SV=1	844
-1.125	-0.69	-0.54	0.68	0.1	False		FALSE	FALSE	FALSE	-0.315	81160.4	69699.6	150860	0.004	4.797	9	2	2	0	2	0	46	1	27.9	0.737718	270.4	419	Q91XH5	Sepiapterin reductase OS=Mus musculus GN=Spr PE=1 SV=1	575
-4.775	-1.13	-0.88	-1.77	-2.64	False		TRUE	TRUE	FALSE	-2.239	161497	28157.7	189654	0.004	4.657	1	2	2	2	2	0	29	1	161.8	0.00659957	71.8	616.2	P23116	Eukaryotic translation initiation factor 3 subunit A OS=Mus musculus GN=Eif3a PE=1 SV=5	118
0.185	-0.26	0.63	-1.86	-3.13	False		FALSE	FALSE	FALSE	-0.887	96222.5	84825.7	181048	0.004	4.649	6	1	1	1	1	0	52	1	31	0.617281	251.8	435.8	Q9CQ65	S-methyl-5'-thioadenosine phosphorylase OS=Mus musculus GN=Mtap PE=1 SV=1	611
1.575	0.09	-0.27	0.64	0.23	False		FALSE	FALSE	FALSE	0.453	65760.7	65975.8	131736	0.005	4.639	4	1	1	1	1	0	43	1	34.6	0.487011	458.2	231.4	O35593	26S proteasome non-ATPase regulatory subunit 14 OS=Mus musculus GN=Psmd14 PE=1 SV=2	649
0.285	-0.09	-0.36	0.26	-0.33	False		FALSE	FALSE	FALSE	-0.047	217433	227672	445105	0.005	4.631	12	1	2	0	1	0	43	1	10.4	0.950642	336.8	352	P63168	Dynein light chain 1, cytoplasmic OS=Mus musculus GN=Dynll1 PE=1 SV=1	810
-2.075	-1.11	-1.68	-1.68	0.27	False		FALSE	FALSE	FALSE	-1.255	92104.7	42185	134290	0.005	4.624	3	1	2	0	1	0	33	1	44.8	0.165948	163.6	524.6	P63037	DnaJ homolog subfamily A member 1 OS=Mus musculus GN=Dnaja1 PE=1 SV=1	226
-0.075	2.15	0.47	2.28	0.54	False		FALSE	FALSE	FALSE	1.073	30502.4	51105.2	81607.6	0.005	4.565	5	1	1	0	1	0	40	1	39.4	0.170408	540	148.2	Q9Z0P5	Twinfilin-2 OS=Mus musculus GN=Twf2 PE=1 SV=1	17
-0.945	-3.14	-3.26	-3.82	-2.44	False		TRUE	TRUE	FALSE	-2.721	250932	44357.6	295290	0.005	4.56	3	2	3	1	2	0	36	1	81.7	0.000905297	43.4	643.8	Q02257	Junction plakoglobin OS=Mus musculus GN=Jup PE=1 SV=3	201
0.435	0.04	0.8	1.05	0.12	False		FALSE	FALSE	FALSE	0.489	120302	190787	311089	0.005	4.509	14	1	1	1	1	0	45	1	9.1	0.384694	489.8	200.4	P62313	U6 snRNA-associated Sm-like protein LSm6 OS=Mus musculus GN=Lsm6 PE=1 SV=1	244
-1.045	2.25	-1.1	1.14	-0.29	False		FALSE	FALSE	FALSE	0.191	81600.5	146200	227800	0.005	4.508	3	2	2	1	2	0	41	1	56	0.918071	346	342	Q9D0K2	Succinyl-CoA:3-ketoacid coenzyme A transferase 1, mitochondrial OS=Mus musculus GN=Oxct1 PE=1 SV=1	604
0.065	0.06	-1.52	0.44	-0.44	False		FALSE	FALSE	FALSE	-0.279	169324	71654.3	240979	0.005	4.505	4	1	1	0	1	0	48	1	45.4	0.895662	296.2	393.8	Q8BW10	RNA-binding protein NOB1 OS=Mus musculus GN=Nob1 PE=1 SV=1	523
-1.075	-2.14	-0.35	-1.02	-1.49	False		FALSE	FALSE	FALSE	-1.215	287963	187914	475877	0.005	4.474	17	2	4	1	2	0	22	1	15.9	0.05836	124.8	562.6	P62911	60S ribosomal protein L32 OS=Mus musculus GN=Rpl32 PE=1 SV=2	578
0.425	0.27	0.73	0.26	0.62	False		FALSE	FALSE	FALSE	0.461	142298	243542	385840	0.005	4.449	2	1	2	0	1	0	68	1	54.8	0.265106	516	173.2	P54822	Adenylosuccinate lyase OS=Mus musculus GN=Adsl PE=1 SV=2	468
0.435	0.33	1.57	-3.77	0.13	False		FALSE	FALSE	FALSE	-0.261	74371.9	97946.8	172319	0.005	4.409	5	1	1	0	1	0	37	1	20.5	0.616324	427.4	262.4	Q9QZ88	Vacuolar protein sorting-associated protein 29 OS=Mus musculus GN=Vps29 PE=1 SV=1	86
0.655	0.06	-0.25	0.71	-0.08	False		FALSE	FALSE	FALSE	0.219	173281	199957	373238	0.005	4.406	4	1	2	1	1	0	53	1	29.6	0.646563	422	267.4	Q9ERB0	Synaptosomal-associated protein 29 OS=Mus musculus GN=Snap29 PE=1 SV=1	160
0.975	0.34	-0.09	0.86	-2.73	False		FALSE	FALSE	FALSE	-0.129	93439.1	136059	229498	0.005	4.392	7	2	2	0	2	0	21	1	56.9	0.682697	409.2	279.8	Q922V4	Pleiotropic regulator 1 OS=Mus musculus GN=Plrg1 PE=1 SV=1	8
0.285	0.08	0.26	0.4	0.11	False		FALSE	FALSE	FALSE	0.227	128330	174025	302355	0.005	4.379	9	1	1	0	1	0	39	1	14.4	0.610346	429.2	261	Q03958	Prefoldin subunit 6 OS=Mus musculus GN=Pfdn6 PE=1 SV=1	446
0.945	-0.76	0.55	-0.47	2.08	False		FALSE	FALSE	FALSE	0.469	41230	60859.3	102089	0.005	4.338	3	1	1	0	1	0	33	1	35	0.58568	433	255	Q8K183	Pyridoxal kinase OS=Mus musculus GN=Pdxk PE=1 SV=1	18
-3.365	0.59	0.27	-3.97	-0.3	False		FALSE	FALSE	FALSE	-1.355	56095.7	44526.7	100622	0.005	4.294	2	1	1	1	1	0	50	1	52.5	0.610888	250	438.4	Q9CT10	Ran-binding protein 3 OS=Mus musculus GN=Ranbp3 PE=1 SV=2	596
0.385	1.37	4.05	-0.34	0.32	False		FALSE	FALSE	FALSE	1.157	45816.3	106048	151865	0.005	4.283	2	1	1	1	1	0	33	1	60.6	0.170576	538.6	149.8	P29416	Beta-hexosaminidase subunit alpha OS=Mus musculus GN=Hexa PE=1 SV=2	492
0.505	0	0.18	-0.46	0.18	False		FALSE	FALSE	FALSE	0.081	60861.5	62219.9	123081	0.005	4.279	5	2	2	1	2	0	20	1	43.2	0.690159	404.4	285	Q8BP48	Methionine aminopeptidase 1 OS=Mus musculus GN=Metap1 PE=1 SV=1	736
-0.085	-0.4	-3.99	0.1	-0.26	False		FALSE	FALSE	FALSE	-0.927	184252	180498	364750	0.005	4.264	6	1	2	1	1	0	43	1	23.6	0.454479	227.2	461.4	Q9ESP1	Stromal cell-derived factor 2-like protein 1 OS=Mus musculus GN=Sdf2l1 PE=1 SV=2	329
-2.145	0.24	-0.22	1.38	0.42	False		FALSE	FALSE	FALSE	-0.065	134742	208435	343177	0.005	4.258	5	2	4	2	2	0	50	1	58.3	0.738509	394.8	294	Q9DAW6	U4/U6 small nuclear ribonucleoprotein Prp4 OS=Mus musculus GN=Prpf4 PE=1 SV=1	309
-1.425	-1.16	-1.78	0.14	-0.71	False		FALSE	FALSE	FALSE	-0.987	83172.8	61519.2	144692	0.005	4.251	2	1	1	0	1	0	54	1	79.1	0.123076	151.4	537	E9QN37	Macrophage-expressed gene 1 protein OS=Mus musculus GN=Mpeg1 PE=1 SV=1	586
-0.365	-1.19	-1.24	-0.74	-1.45	False		FALSE	FALSE	FALSE	-0.997	248346	137269	385614	0.005	4.15	8	1	5	1	1	0	144	1	13.8	0.0816821	135.6	552	P01887	Beta-2-microglobulin OS=Mus musculus GN=B2m PE=1 SV=2	687
-3.375	0.18	0.43	2.26	-0.3	False		FALSE	FALSE	FALSE	-0.161	38233	46995	85228	0.005	4.134	9	1	2	0	1	0	47	1	25.1	0.887069	356.2	334.2	Q9DB34	Charged multivesicular body protein 2a OS=Mus musculus GN=Chmp2a PE=1 SV=1	459
0.125	-0.54	-1.59	-1.41	-0.4	False		FALSE	FALSE	FALSE	-0.763	45196.8	21249.4	66446.1	0.005	4.117	6	1	1	1	1	0	31	1	21.9	0.278181	195.4	493.6	P12815	Programmed cell death protein 6 OS=Mus musculus GN=Pdcd6 PE=1 SV=2	458
-2.715	-0.87	-1.92	0.85	-0.57	False		FALSE	FALSE	FALSE	-1.045	59340.1	35605.8	94945.9	0.005	4.113	1	1	2	1	1	0	27	1	294.7	0.23397	184.2	504.6	Q8BTI8	Serine/arginine repetitive matrix protein 2 OS=Mus musculus GN=Srrm2 PE=1 SV=3	233
-0.505	-0.16	-1.57	0.5	0.48	False		FALSE	FALSE	FALSE	-0.251	70206.4	52928.5	123135	0.005	4.032	3	1	1	1	1	0	31	1	48.3	0.997817	314.4	374.2	Q3TIV5	Zinc finger CCCH domain-containing protein 15 OS=Mus musculus GN=Zc3h15 PE=1 SV=2	123
-3.505	-3.73	-5.19	-3.52	-2.99	False		TRUE	TRUE	FALSE	-3.787	216824	16627.2	233451	0.005	3.971	11	1	2	1	1	0	35	1	14.6	1.31e-05	16.2	670.8	P59708	Splicing factor 3B subunit 6 OS=Mus musculus GN=Sf3b6 PE=1 SV=1	803
-0.725	-0.09	-1.2	0.62	-0.24	False		FALSE	FALSE	FALSE	-0.327	320704	188468	509172	0.006	3.955	4	1	1	0	1	0	0	1	53.5	0.658376	257.6	432.2	P26369	Splicing factor U2AF 65 kDa subunit OS=Mus musculus GN=U2af2 PE=1 SV=3	260
-2.995	0.42	-0.42	-0.45	-1.39	False		FALSE	FALSE	FALSE	-0.967	40594.5	23276.8	63871.3	0.006	3.953	2	1	1	0	1	0	42	1	50.4	0.41945	221	466.8	B7ZCF1	26S protease regulatory subunit 6A OS=Mus musculus GN=Psmc3 PE=1 SV=1	722
-2.025	-3.84	-2.87	-2.72	-1.94	False		TRUE	TRUE	FALSE	-2.679	92952.9	18703.8	111657	0.006	3.939	2	1	1	1	1	0	23	1	109.9	0.000343008	34.6	652.8	O70318	Band 4.1-like protein 2 OS=Mus musculus GN=Epb41l2 PE=1 SV=2	225
-1.425	-2.49	-2.39	-1.68	-3.11	False		TRUE	TRUE	FALSE	-2.219	175775	51679.8	227455	0.006	3.927	3	1	1	1	1	0	27	1	63.9	0.00196703	53	634.6	O70194	Eukaryotic translation initiation factor 3 subunit D OS=Mus musculus GN=Eif3d PE=1 SV=2	301
-1.715	-3.07	-3.41	0.87	0.34	False		FALSE	FALSE	FALSE	-1.397	113274	35819.3	149093	0.006	3.906	15	1	2	1	1	0	30	1	9.1	0.541731	240	449	Q8BHL7	CDC42 small effector protein 1 OS=Mus musculus GN=Cdc42se1 PE=1 SV=1	790
-6.635	-2.31	-9.32	-7.11	-7.98	False		TRUE	TRUE	FALSE	-6.671	6013330	30113.6	6043440	0.006	3.883	8	1	7	0	1	0	0	1	26.3	1.85e-06	10.2	676.8	Q9QUK9	MCG15083 OS=Mus musculus GN=Try5 PE=1 SV=1	441
0.445	-1.76	-0.13	1.23	0.29	False		FALSE	FALSE	FALSE	0.015	132400	180860	313260	0.006	3.873	6	1	1	0	1	0	44	1	16.6	0.671858	411.6	276.8	A2A7K5	C-Myc-binding protein OS=Mus musculus GN=Mycbp PE=1 SV=1	562
-2.745	-3.63	-5.52	-3.15	-2.44	False		TRUE	TRUE	FALSE	-3.497	230649	27308	257957	0.007	3.868	2	1	1	0	1	0	48	1	61.4	6.24e-05	24	663.2	A0A0B4J1E2	SNW domain-containing protein 1 OS=Mus musculus GN=Snw1 PE=1 SV=1	477
-0.825	-3.73	0.32	-3.48	1.33	False		FALSE	FALSE	FALSE	-1.277	96305	23673.3	119978	0.007	3.862	5	1	1	0	1	0	0	1	24.6	0.610888	249.8	437.8	A0A1D5RM85	60S ribosomal protein L18a (Fragment) OS=Mus musculus GN=Rpl18a PE=1 SV=1	917
4.065	1.7	2.44	2.4	3.89	False		TRUE	FALSE	TRUE	2.899	13944.8	176113	190057	0.007	3.862	2	1	2	1	1	0	49	1	58.8	2.47e-05	671.8	15.6	O08795	Glucosidase 2 subunit beta OS=Mus musculus GN=Prkcsh PE=1 SV=1	127
-0.035	-0.06	-0.9	0.57	0.19	False		FALSE	FALSE	FALSE	-0.047	238163	223525	461689	0.007	3.858	3	1	4	1	1	0	60	1	39.5	0.935521	343.4	347.2	Q9JHJ0	Tropomodulin-3 OS=Mus musculus GN=Tmod3 PE=1 SV=1	394
0.095	0.6	0.48	0.79	-0.03	False		FALSE	FALSE	FALSE	0.387	114118	192822	306940	0.007	3.853	27	2	2	0	2	0	26	1	9.1	0.476007	462	227.8	P61961	Ubiquitin-fold modifier 1 OS=Mus musculus GN=Ufm1 PE=1 SV=1	892
-0.485	1.22	1.2	2.21	-0.92	False		FALSE	FALSE	FALSE	0.645	44563.8	119570	164134	0.006	3.82	2	1	1	1	1	0	40	1	79	0.591562	429.8	257.2	Q9QUJ7	Long-chain-fatty-acid--CoA ligase 4 OS=Mus musculus GN=Acsl4 PE=1 SV=2	595
0.445	-3.8	1.21	-2.29	-0.53	False		FALSE	FALSE	FALSE	-0.993	182270	28854	211124	0.006	3.804	8	1	2	0	1	0	75	1	12.2	0.790634	278.6	410	O35143	ATPase inhibitor, mitochondrial OS=Mus musculus GN=Atpif1 PE=1 SV=2	854
3.595	1.08	-0.06	5.19	1.01	False		TRUE	FALSE	TRUE	2.163	47436.2	118288	165724	0.007	3.761	3	1	1	0	1	0	30	1	43.4	0.0375863	594.8	93.2	P70318	Nucleolysin TIAR OS=Mus musculus GN=Tial1 PE=1 SV=1	669
-0.995	-1.27	-1.63	0.15	-0.79	False		FALSE	FALSE	FALSE	-0.907	78016.4	41116.6	119133	0.007	3.755	1	1	1	1	1	0	37	1	93.5	0.135751	155.6	532.6	Q9JIK5	Nucleolar RNA helicase 2 OS=Mus musculus GN=Ddx21 PE=1 SV=3	717
0.205	-0.4	-0.03	-0.16	-0.17	False		FALSE	FALSE	FALSE	-0.111	143317	156069	299386	0.007	3.749	27	1	1	1	1	0	17	1	10.1	0.997817	315.6	374.8	O54962	Barrier-to-autointegration factor OS=Mus musculus GN=Banf1 PE=1 SV=1	785
2.845	1.02	1.53	2.21	1.9	False		TRUE	FALSE	TRUE	1.901	43963.4	198033	241997	0.007	3.745	4	1	2	0	1	0	35	1	43.7	0.000930405	648	39.4	Q3THS6	S-adenosylmethionine synthase isoform type-2 OS=Mus musculus GN=Mat2a PE=1 SV=2	71
0.385	-0.13	-0.16	-0.19	0.27	False		FALSE	FALSE	FALSE	0.035	117253	138983	256236	0.007	3.722	4	1	3	1	1	0	22	1	46.6	0.793739	385.2	306	P63005	Platelet-activating factor acetylhydrolase IB subunit alpha OS=Mus musculus GN=Pafah1b1 PE=1 SV=2	234
-2.815	-4.27	-5.22	-2.84	-3.13	False		TRUE	TRUE	FALSE	-3.655	394476	45387	439863	0.007	3.719	3	1	4	1	1	0	38	1	36.4	2.43e-05	19	668.2	Q9QZD9	Eukaryotic translation initiation factor 3 subunit I OS=Mus musculus GN=Eif3i PE=1 SV=1	198
-3.425	0.4	-0.33	2.1	-0.64	False		FALSE	FALSE	FALSE	-0.379	49346.3	78696.4	128043	0.007	3.706	4	1	1	1	1	0	39	1	37.6	0.997817	317.8	370.4	Q9QYS9	Protein quaking OS=Mus musculus GN=Qki PE=1 SV=1	151
0.275	0.31	0.44	2.24	0.1	False		FALSE	FALSE	FALSE	0.673	360201	639853	1000050	0.007	3.705	8	1	6	1	1	0	57	1	13	0.33923	500.4	190.4	P62855	40S ribosomal protein S26 OS=Mus musculus GN=Rps26 PE=1 SV=3	642
0.055	0.07	2.75	-2.73	0.04	False		FALSE	FALSE	FALSE	0.037	133072	199630	332702	0.007	3.694	5	1	1	1	1	0	37	1	28.5	0.847371	367	323.2	O55234	Proteasome subunit beta type-5 OS=Mus musculus GN=Psmb5 PE=1 SV=3	753
3.385	2.43	2.45	2.07	3.74	False		TRUE	FALSE	TRUE	2.815	9770.6	79158.9	88929.5	0.007	3.688	9	1	1	1	1	0	25	1	19	2.47e-05	671.2	16	Q9CPP0	Nucleoplasmin-3 OS=Mus musculus GN=Npm3 PE=1 SV=3	639
-1.535	-3.59	1.95	-2.09	-2.51	False		FALSE	FALSE	FALSE	-1.555	51931.1	21967.5	73898.7	0.007	3.661	2	1	1	1	1	0	39	1	48.9	0.17526	165.8	521.2	P59325	Eukaryotic translation initiation factor 5 OS=Mus musculus GN=Eif5 PE=1 SV=1	902
0.265	1.22	0.4	-0.41	0.16	False		FALSE	FALSE	FALSE	0.327	47352.9	76098.6	123451	0.007	3.64	3	1	2	1	1	0	18	1	46.2	0.489643	455.8	235.2	Q8K2Q7	BRO1 domain-containing protein BROX OS=Mus musculus GN=Brox PE=1 SV=1	251
-2.405	-2.01	-1.01	-0.56	-2.32	False		TRUE	TRUE	FALSE	-1.661	40168.3	19870.9	60039.2	0.008	3.564	3	1	1	1	1	0	24	1	47.2	0.0195641	95.2	592.4	Q9DBG5	Perilipin-3 OS=Mus musculus GN=Plin3 PE=1 SV=1	111
-1.685	-2.26	-0.62	-1.87	-3.74	False		TRUE	TRUE	FALSE	-2.035	134349	34038.9	168388	0.008	3.535	2	1	1	1	1	0	41	1	45.7	0.00775133	75	612.6	P17047	Lysosome-associated membrane glycoprotein 2 OS=Mus musculus GN=Lamp2 PE=1 SV=2	778
0.255	0.19	0.91	-1.66	0.00999999	False		FALSE	FALSE	FALSE	-0.059	104139	144578	248717	0.008	3.527	3	1	3	1	1	0	0	1	22.9	0.80489	381	309.2	Q9R1P1	Proteasome subunit beta type-3 OS=Mus musculus GN=Psmb3 PE=1 SV=1	880
-1.665	-1.04	-2.58	-1.35	-2.26	False		TRUE	TRUE	FALSE	-1.779	70083	21956.1	92039.1	0.008	3.525	2	1	1	1	1	0	39	1	49.5	0.00775133	75	612.8	Q9JIH2	Nuclear pore complex protein Nup50 OS=Mus musculus GN=Nup50 PE=1 SV=3	425
0.195	0.27	-3.05	-1.39	-1.3	False		FALSE	FALSE	FALSE	-1.055	129081	59650.8	188732	0.009	3.509	3	2	2	0	2	0	31	1	99.5	0.490342	232	457.2	B2RY56	RNA-binding protein 25 OS=Mus musculus GN=Rbm25 PE=1 SV=2	103
0.075	-0.19	-0.41	0.95	-0.44	False		FALSE	FALSE	FALSE	-0.003	74323.3	66018.4	140342	0.009	3.493	17	1	2	1	1	0	18	1	11.5	0.972114	328.6	362.8	Q9JIX0	Transcription and mRNA export factor ENY2 OS=Mus musculus GN=Eny2 PE=1 SV=1	677
1.775	-2.42	-2.64	-3.63	3.78	False		FALSE	FALSE	FALSE	-0.627	118434	34492.2	152926	0.009	3.479	10	1	1	1	1	0	42	1	10.4	0.857391	288.8	398.6	Q6ZWM4	U6 snRNA-associated Sm-like protein LSm8 OS=Mus musculus GN=Lsm8 PE=1 SV=3	825
1.265	-4.54	-0.24	1.17	-0.18	False		FALSE	FALSE	FALSE	-0.505	161340	159617	320958	0.009	3.478	4	1	2	0	1	0	59	1	25.1	0.851406	362.6	325.6	A2AUD5	Tumor protein D54 OS=Mus musculus GN=Tpd52l2 PE=1 SV=1	455
1.725	2.51	2.04	3.6	0.77	False		TRUE	FALSE	TRUE	2.129	10567.5	91127.3	101695	0.009	3.477	4	1	1	1	1	0	22	1	34.3	0.000235412	660.2	27.6	Q8BJU0	Small glutamine-rich tetratricopeptide repeat-containing protein alpha OS=Mus musculus GN=Sgta PE=1 SV=2	125
0.225	0.21	-3.05	0.7	0.1	False		FALSE	FALSE	FALSE	-0.363	114297	160539	274835	0.009	3.469	4	1	1	0	1	0	40	1	31.5	0.84141	373	317.8	P70677	Caspase-3 OS=Mus musculus GN=Casp3 PE=1 SV=1	7
0.275	1.41	0.83	1.29	0.43	False		FALSE	FALSE	FALSE	0.847	82932.3	170297	253229	0.009	3.465	1	1	2	0	1	0	24	1	117.9	0.0771319	572.8	117.4	Q91VX2	Ubiquitin-associated protein 2 OS=Mus musculus GN=Ubap2 PE=1 SV=1	81
0.655	1.02	1.31	-0.69	0.87	False		FALSE	FALSE	FALSE	0.633	66321.7	106228	172550	0.009	3.456	3	1	2	1	1	0	21	1	43.9	0.170408	539.2	148.6	Q9Z1G3	V-type proton ATPase subunit C 1 OS=Mus musculus GN=Atp6v1c1 PE=1 SV=4	833
-0.865	-2.06	-1.89	-0.76	-1.47	False		TRUE	TRUE	FALSE	-1.409	125407	56405.6	181813	0.009	3.421	2	1	2	0	1	0	35	1	69.7	0.0257123	101.8	585.8	Q5SUH6	Clathrin interactor 1 OS=Mus musculus GN=Clint1 PE=1 SV=1	372
-0.635	-1.11	0.3	-1.48	-0.17	False		FALSE	FALSE	FALSE	-0.619	50782.6	34576.5	85359.2	0.009	3.398	2	1	1	0	1	0	27	1	49.9	0.371571	212.4	476.2	Q8CBC8	Branched-chain-amino-acid aminotransferase OS=Mus musculus GN=Bcat1 PE=1 SV=1	349
-1.595	-1.64	-0.98	-3.3	-2.04	False		TRUE	TRUE	FALSE	-1.911	66895.3	21233.4	88128.6	0.009	3.367	9	1	1	1	1	0	0	1	21	0.00487283	65	622.2	Q99N11	Dual specificity protein phosphatase 22 OS=Mus musculus GN=Dusp22 PE=1 SV=1	613
0.755	0.7	0.18	0.91	0.12	False		FALSE	FALSE	FALSE	0.533	57537.3	94096.4	151634	0.009	3.366	3	1	1	0	1	0	28	1	30.3	0.249104	520.4	169	Q9QZ06	Toll-interacting protein OS=Mus musculus GN=Tollip PE=1 SV=1	287
-0.415	-1.55	1.2	-0.72	-1.15	False		FALSE	FALSE	FALSE	-0.527	28712.4	27495.5	56207.9	0.009	3.364	1	1	1	0	1	0	22	1	273.8	0.448332	226.2	462.4	F6ZDS4	Nucleoprotein TPR OS=Mus musculus GN=Tpr PE=1 SV=1	224
0.625	-0.95	2.15	2.35	3.3	False		FALSE	FALSE	FALSE	1.495	17097.8	55603.9	72701.8	0.009	3.345	2	1	1	1	1	0	26	1	87.1	0.153833	547	140.6	Q99KC8	von Willebrand factor A domain-containing protein 5A OS=Mus musculus GN=Vwa5a PE=1 SV=2	755
2.555	-0.27	-1.95	0.65	2.37	False		FALSE	FALSE	FALSE	0.671	42588	68584.5	111172	0.009	3.308	2	1	1	0	1	0	24	1	51.2	0.598452	428.6	258.8	A0A087WQS2	Basic leucine zipper and W2 domain-containing protein 1 OS=Mus musculus GN=Bzw1 PE=1 SV=1	112
2.415	-0.15	2.32	-0.26	1.92	False		FALSE	FALSE	FALSE	1.249	16548.2	41366.6	57914.8	0.009	3.305	3	1	1	1	1	0	29	1	43.5	0.290123	510.4	177.4	Q8VCN5	Cystathionine gamma-lyase OS=Mus musculus GN=Cth PE=1 SV=1	524
0.355	0.28	0.23	0.28	0.26	False		FALSE	FALSE	FALSE	0.281	89678.3	124387	214065	0.009	3.27	11	1	2	1	1	0	28	1	11	0.463952	466.6	223.4	Q9WVA2	Mitochondrial import inner membrane translocase subunit Tim8 A OS=Mus musculus GN=Timm8a1 PE=1 SV=1	847
-1.025	0.44	-1.2	-0.87	-4.07	False		FALSE	FALSE	FALSE	-1.345	36223.8	20350.8	56574.7	0.01	3.209	2	1	1	1	1	0	34	1	41.3	0.251498	190.2	497.6	Q3UM45	Protein phosphatase 1 regulatory subunit 7 OS=Mus musculus GN=Ppp1r7 PE=1 SV=2	683
-2.035	0.29	-2.32	-4.41	-0.06	False		FALSE	FALSE	FALSE	-1.707	68822.8	35912.7	104735	0.01	3.207	6	1	2	0	1	0	19	1	24.5	0.23397	183.2	505.6	P86048	60S ribosomal protein L10-like OS=Mus musculus GN=Rpl10l PE=2 SV=1	116
